# Supplementary material for: The Black Necrotic Lesion Enhanced Fusarium graminearum Resistance in Wheat
Source: Front Plant Sci. 2022 Jun 30;13:926621. doi: 10.3389/fpls.2022.926621 (PMC9280303; doi:10.3389/fpls.2022.926621)
Supplement: Supplementary file 1 [file Table_1.XLSX]

## Sheet: Table S1 Primers
Supplemental Table 1 Primers used in the study
Primer name	Primer sequence (5'-3')	Description
TaICS1-F-lic	AAGGAAGTTTAATTTCTCCAGGAGAAG	VIGS vector construction of TaICS1 gene
TaICS1-R-lic	AACCACCACCACCGTTCTCCAGTTATTTGAG
TaNPR1-F-lic	AAGGAAGTTTAACACTTAGCTCGGATGAGAGCCCTCTC	VIGS vector construction of TaNPR1 gene
TaNPR1-R-lic	AACCACCACCACCGTCCTCCTTGTCCTCGCTGAACGC
TaNPR2-F-lic	AAGGAAGTTTAAGCAAAGATGGAGCAGGGCCAAGAG	VIGS vector construction of TaNPR2 gene
TaNPR2-R-lic	AACCACCACCACCGTGCGCAATTTGCATCGCAACCTTCGC
TaNPR3-F-lic	AAGGAAGTTTAACGACAGCCGGTACCTCGAGAAG	VIGS vector construction of TaNPR3 gene
TaNPR3-R-lic	AACCACCACCACCGTCAAGAGCAAAGCCAACACTTTAGG
TaPAL2-F-lic	AAGGAAGTTTAATGACCTCGTCCCGCTTTCATACATC	VIGS vector construction of TaPAL2 gene
TaPAL2-R-lic	AACCACCACCACCGTAGCCTCGAAAAGCACCATGGATG
qTaICS1-F	AGAAATGAGGACGACGAGTTTGAC	qPCR primer for TaICS1 gene
qTaICS1-R	CCAAGTAGTGCTGATCTAATTCCAA
qTaNPR1-F	GCTCACAGAAGGGCAGACAA	qPCR primer for TaNPR1 gene
qTaNPR1-R	GCTTAGCGGCGATGTGAAGA
qTaNPR2-F	CTGAAGCGAAGGTTGCG	qPCR primer for TaNPR2 gene
qTaNPR2-R	TTTGTTACTGGCGTCTCATTC
qTaNPR3-F	ACGACGATTCAGACGAGTTCA	qPCR primer for TaNPR3 gene
qTaNPR3-R	GCCAACACTTTAGGCTCACAAT
qTaPAL2-F	CAATCTCCACAACGCACGCTTCT	qPCR primer for TaPAL2 gene
qTaPAL2-R	GTGGCAAGCTTAGCAAACACAG
18SrRNA-F	GTGACGGGTGACGGAGAATT	Housekeeping gene for qPCR normalization in wheat
18SrRNA-R	GACACTAATGCGCCCGGTAT
BS10	GGTGCTTGATGCTTTGGATAAGG	Primer for BSMV-virus fragment testing
BS32	TGGTCTTCCCTTGGGGGAC
Sequences underlined represented the adaptor of VIGS vector construction.

## Sheet: Table S2 DEG RR
Supplemental Table 2 A total of 5458 common significantly differentially expressed genes in both "CK_vs_R40" and "CK_vs_R64"
	CK_vs_R40	CK_vs_R64
Gene_id	Log2FoldChange	Log2FoldChange
TraesCS1A01G033000	-1.002	-0.73012
TraesCS1A01G033300	3.5938	2.8491
TraesCS1A01G033600	-2.4501	-1.7037
TraesCS1A01G035000	1.2899	1.2554
TraesCS1A01G037400	1.4067	1.5
TraesCS1A01G041400	#NAME?	#NAME?
TraesCS1A01G046400	1.0172	1.0393
TraesCS1A01G046500	-0.57056	-0.57366
TraesCS1A01G054000	1.7642	1.774
TraesCS1A01G055200	-1.0273	-1.031
TraesCS1A01G056900	-2.1423	-1.2751
TraesCS1A01G057200	2.0104	1.9422
TraesCS1A01G058100	-3.5058	-2.9204
TraesCS1A01G058300	5.3466	5.6069
TraesCS1A01G058700	3.4827	2.9278
TraesCS1A01G062100	0.75346	0.42455
TraesCS1A01G067900	-0.9641	-0.92393
TraesCS1A01G068000	0.96026	0.82069
TraesCS1A01G069400	-0.38633	-0.50359
TraesCS1A01G069500	1.9838	2.1183
TraesCS1A01G069600	2.345	2.2846
TraesCS1A01G069700	1.0617	0.9348
TraesCS1A01G074800	1.1922	1.1018
TraesCS1A01G077500	0.59256	0.50774
TraesCS1A01G079900	-2.635	-1.658
TraesCS1A01G081200	2.7284	1.4214
TraesCS1A01G081300	0.93127	0.69859
TraesCS1A01G082000	-1.2699	-1.0749
TraesCS1A01G083400	0.97844	0.74916
TraesCS1A01G083500	-1.2103	-0.88038
TraesCS1A01G084600	-0.89887	-1.842
TraesCS1A01G084800	-2.6796	-2.9337
TraesCS1A01G085400	-0.95905	-2.1796
TraesCS1A01G085500	1.1935	0.83176
TraesCS1A01G088200	0.9137	0.65476
TraesCS1A01G088900	-0.99911	-0.96732
TraesCS1A01G089500	2.1813	1.8189
TraesCS1A01G091200	-1.1486	-0.9014
TraesCS1A01G091300	-1.0485	-0.88617
TraesCS1A01G093300	-0.399	-0.94251
TraesCS1A01G094000	0.61251	0.73344
TraesCS1A01G094700	2.8194	1.8857
TraesCS1A01G094900	2.364	1.904
TraesCS1A01G096600	-1.596	-1.5306
TraesCS1A01G097500	-0.86651	-0.74924
TraesCS1A01G100200	0.91542	0.89758
TraesCS1A01G102300	-0.85023	-0.68339
TraesCS1A01G103900	1.0776	0.81189
TraesCS1A01G104200	2.2949	0.70096
TraesCS1A01G105300	1.3856	1.8706
TraesCS1A01G106000	-0.58453	-0.48867
TraesCS1A01G107600	-0.61034	-0.47642
TraesCS1A01G107900	1.2254	1.4932
TraesCS1A01G108300	-0.70933	-0.83599
TraesCS1A01G108400	0.8539	0.8275
TraesCS1A01G109200	-0.57351	-0.65562
TraesCS1A01G112100	-0.55266	-0.60888
TraesCS1A01G113700	1.6491	1.2521
TraesCS1A01G114400	3.8308	3.6131
TraesCS1A01G115200	2.0944	2.2055
TraesCS1A01G115500	-0.99519	-1.0375
TraesCS1A01G115900	-1.5665	-0.97639
TraesCS1A01G121400	-0.48264	-0.71786
TraesCS1A01G124400	1.2766	1.5256
TraesCS1A01G127000	-0.63571	-0.45778
TraesCS1A01G131000	-0.43558	-0.51664
TraesCS1A01G132600	-0.55955	-0.46136
TraesCS1A01G134300	-0.54657	-0.56446
TraesCS1A01G137400	-0.85132	-0.85052
TraesCS1A01G137700	-0.49539	-0.5974
TraesCS1A01G138000	-1.096	-1.0113
TraesCS1A01G138400	-0.62918	-0.74297
TraesCS1A01G138600	-0.48656	-0.44398
TraesCS1A01G140800	Inf	Inf
TraesCS1A01G144300	-0.8631	-1.023
TraesCS1A01G149200	0.6864	0.67676
TraesCS1A01G150400	0.60329	0.54626
TraesCS1A01G151000	1.2182	1.5131
TraesCS1A01G154200	-1.195	-0.82725
TraesCS1A01G154300	-0.59814	-0.58695
TraesCS1A01G156600	-1.1452	-1.0136
TraesCS1A01G157900	1.3356	1.6387
TraesCS1A01G159400	-0.72127	-0.867
TraesCS1A01G160600	-0.59542	-0.64814
TraesCS1A01G161300	1.5489	1.6756
TraesCS1A01G162300	-0.72895	-0.95741
TraesCS1A01G165400	1.969	1.2999
TraesCS1A01G169200	2.1644	1.5471
TraesCS1A01G169500	1.8702	1.7041
TraesCS1A01G170600	0.85707	0.90578
TraesCS1A01G171300	3.923	4.1025
TraesCS1A01G171600	-0.85764	-1.4107
TraesCS1A01G173100	1.0674	0.77744
TraesCS1A01G175200	4.9561	5.4624
TraesCS1A01G179500	1.6274	2.0084
TraesCS1A01G182500	1.0278	1.6573
TraesCS1A01G183900	-1.3072	-1.2376
TraesCS1A01G184900	2.1681	1.9238
TraesCS1A01G188200	-0.5453	-0.51731
TraesCS1A01G191400	-0.54885	-0.60549
TraesCS1A01G191700	2.8669	3.4012
TraesCS1A01G191800	4.3205	4.7054
TraesCS1A01G191900	0.64322	0.74022
TraesCS1A01G194100	0.97855	1.2792
TraesCS1A01G194500	4.2364	4.3617
TraesCS1A01G194800	-0.57896	-0.41891
TraesCS1A01G196600	-0.93073	-0.4743
TraesCS1A01G196800	-1.0325	-1.1957
TraesCS1A01G201700	2.276	2.2669
TraesCS1A01G203200	2.8277	2.6846
TraesCS1A01G205300	-0.76951	-0.64035
TraesCS1A01G206300	-1.8046	-1.1023
TraesCS1A01G206800	3.4812	3.3038
TraesCS1A01G207900	-2.07	-1.5744
TraesCS1A01G208600	-0.85978	-0.72097
TraesCS1A01G209400	2.6843	3.2253
TraesCS1A01G209600	0.90417	1.2214
TraesCS1A01G210500	1.6876	2.0274
TraesCS1A01G213600	2.1478	2.2986
TraesCS1A01G215100	2.4401	2.0768
TraesCS1A01G218300	4.4084	4.6509
TraesCS1A01G220300	3.6719	3.4679
TraesCS1A01G221000	1.4645	1.6116
TraesCS1A01G222000	-1.142	-0.81384
TraesCS1A01G222500	3.0386	2.8462
TraesCS1A01G223000	-1.3966	-1.3992
TraesCS1A01G223800	0.56432	0.54987
TraesCS1A01G228900	1.4155	1.5308
TraesCS1A01G229800	2.134	2.8305
TraesCS1A01G230000	-0.85834	-0.70241
TraesCS1A01G233100	-2.7411	-2.6387
TraesCS1A01G233600	0.53345	0.57103
TraesCS1A01G234600	1.0103	0.5333
TraesCS1A01G235500	-1.0071	-0.69467
TraesCS1A01G236300	-0.85512	-1.9861
TraesCS1A01G237000	#NAME?	-5.7338
TraesCS1A01G237200	-0.47455	-0.55852
TraesCS1A01G240000	-0.76133	-0.77662
TraesCS1A01G240200	2.2413	1.7878
TraesCS1A01G240600	-0.68629	-0.46128
TraesCS1A01G241500	3.0613	2.8897
TraesCS1A01G242400	1.9095	2.136
TraesCS1A01G243100	-0.60683	-0.53934
TraesCS1A01G244900	1.183	1.9114
TraesCS1A01G247900	-0.62631	-1.1683
TraesCS1A01G250400	2.2332	2.0363
TraesCS1A01G251100	0.82107	0.6778
TraesCS1A01G251600	-0.2444	-0.43714
TraesCS1A01G252000	0.56177	0.61887
TraesCS1A01G252400	0.81936	0.95643
TraesCS1A01G258100	0.63533	0.67276
TraesCS1A01G258400	1.4523	2.4942
TraesCS1A01G260900	-0.91846	-0.73604
TraesCS1A01G263900	2.7489	3.1964
TraesCS1A01G268800	3.9088	4.3096
TraesCS1A01G273100	-0.41266	-0.43455
TraesCS1A01G274800	1.6969	1.3948
TraesCS1A01G275300	1.1654	1.2102
TraesCS1A01G277600	-0.97261	-0.7099
TraesCS1A01G279900	-1.2208	-1.3029
TraesCS1A01G280600	0.6483	1.0555
TraesCS1A01G281000	0.52819	1.1853
TraesCS1A01G281100	1.3016	1.2568
TraesCS1A01G282400	1.538	1.5283
TraesCS1A01G283100	2.5532	2.4114
TraesCS1A01G283400	4.6094	3.2664
TraesCS1A01G285000	2.3106	0.60122
TraesCS1A01G285600	0.92604	0.83566
TraesCS1A01G286300	0.50274	0.57944
TraesCS1A01G287000	6.0482	6.9015
TraesCS1A01G288400	-0.45138	-0.41086
TraesCS1A01G295300	2.1493	2.0034
TraesCS1A01G295900	3.8988	3.2338
TraesCS1A01G297400	0.99657	1.5521
TraesCS1A01G297500	1.7915	2.2522
TraesCS1A01G297900	1.2933	1.1327
TraesCS1A01G298300	4.0985	4.0367
TraesCS1A01G298800	1.8108	1.9488
TraesCS1A01G299300	4.876	4.9094
TraesCS1A01G304000	1.2196	2.1081
TraesCS1A01G305200	-1.8277	-1.2951
TraesCS1A01G305400	2.9287	3.2573
TraesCS1A01G306600	3.105	3.9874
TraesCS1A01G307200	-3.6275	-2.9581
TraesCS1A01G307900	-2.3024	-1.1685
TraesCS1A01G311300	5.6951	5.5264
TraesCS1A01G311400	-0.3745	-0.40373
TraesCS1A01G315500	1.5166	1.7626
TraesCS1A01G316100	0.959	0.65431
TraesCS1A01G317200	-0.44604	-0.57517
TraesCS1A01G321900	0.90858	0.74878
TraesCS1A01G324000	1.1035	1.8508
TraesCS1A01G325600	-0.97098	-0.45665
TraesCS1A01G326100	4.382	4.8604
TraesCS1A01G328100	3.7613	3.4152
TraesCS1A01G328800	2.2034	2.5788
TraesCS1A01G329300	1.6675	1.8795
TraesCS1A01G330300	-0.7232	-0.55761
TraesCS1A01G330700	0.56566	0.56775
TraesCS1A01G331700	-0.81109	-0.58063
TraesCS1A01G331800	1.0331	1.0286
TraesCS1A01G337800	-0.39605	-0.3321
TraesCS1A01G339200	1.1974	1.4073
TraesCS1A01G339700	5.322	4.2566
TraesCS1A01G341200	3.3526	3.008
TraesCS1A01G344000	0.48671	0.36256
TraesCS1A01G347200	2.569	2.4099
TraesCS1A01G349200	1.8013	2.0006
TraesCS1A01G350500	-0.45048	-0.3887
TraesCS1A01G351300	5.2416	4.8539
TraesCS1A01G351900	0.98315	0.45244
TraesCS1A01G354800	3.5945	3.4352
TraesCS1A01G356300	-1.7164	-1.7244
TraesCS1A01G365600	0.78024	0.67842
TraesCS1A01G367600	-0.63094	-0.62348
TraesCS1A01G375000	3.7666	3.3258
TraesCS1A01G377000	Inf	Inf
TraesCS1A01G378200	-0.61277	-0.62124
TraesCS1A01G379700	1.283	1.2207
TraesCS1A01G383200	2.8511	3.1103
TraesCS1A01G383500	1.9769	2.2119
TraesCS1A01G383800	3.835	4.2002
TraesCS1A01G391100	Inf	Inf
TraesCS1A01G401900	2.8365	2.6474
TraesCS1A01G403200	0.82845	1.0323
TraesCS1A01G403300	5.1141	5.1411
TraesCS1A01G405800	-0.46951	-0.59955
TraesCS1A01G406300	-1.6985	-1.2538
TraesCS1A01G407100	0.83326	0.61134
TraesCS1A01G409100	0.68332	0.88133
TraesCS1A01G419600	-1.6727	-1.4696
TraesCS1A01G421600	3.083	4.619
TraesCS1A01G423700	2.8682	3.3699
TraesCS1A01G425000	0.36537	0.67433
TraesCS1A01G425400	-0.54935	-0.77922
TraesCS1A01G426900	1.2487	1.9467
TraesCS1A01G430400	-0.66786	-0.66306
TraesCS1A01G432800	-1.6953	-1.0552
TraesCS1A01G435200	-2.1346	-1.4442
TraesCS1A01G439800	4.1575	4.5351
TraesCS1A01G441100	0.77064	0.92328
TraesCS1B01G001100	1.3949	1.435
TraesCS1B01G004000	#NAME?	#NAME?
TraesCS1B01G007900	1.5853	1.0267
TraesCS1B01G016400	-0.97256	-1.3885
TraesCS1B01G018600	-3.1911	-2.0316
TraesCS1B01G019700	2.7645	2.2779
TraesCS1B01G022800	1.2796	1.388
TraesCS1B01G024400	-0.98981	-1.0684
TraesCS1B01G024900	2.9398	3.531
TraesCS1B01G036500	1.8804	1.7595
TraesCS1B01G038000	0.57668	0.72424
TraesCS1B01G041300	-0.54019	-0.70015
TraesCS1B01G043200	-1.0898	-1.3663
TraesCS1B01G044800	4.0407	3.6291
TraesCS1B01G045300	3.0354	3.0216
TraesCS1B01G047900	1.8812	1.8736
TraesCS1B01G059000	0.90314	1.0527
TraesCS1B01G060000	-0.43604	-0.51624
TraesCS1B01G066900	-1.9804	-1.5372
TraesCS1B01G068400	-0.80095	-0.34202
TraesCS1B01G071200	1.5717	2.284
TraesCS1B01G073600	-1.4287	-1.1493
TraesCS1B01G075200	2.6821	2.8697
TraesCS1B01G076400	2.4823	2.5678
TraesCS1B01G086100	-1.348	-1.0978
TraesCS1B01G089100	2.9729	2.4826
TraesCS1B01G098800	2.8502	1.9363
TraesCS1B01G100800	1.1552	0.95661
TraesCS1B01G101500	3.0283	2.6078
TraesCS1B01G102500	-0.79454	-2.7589
TraesCS1B01G102600	0.94922	0.74207
TraesCS1B01G104600	0.79529	0.6181
TraesCS1B01G111500	1.258	1.3383
TraesCS1B01G114400	4.9837	4.0393
TraesCS1B01G116700	1.4872	1.394
TraesCS1B01G117400	1.3448	1.0751
TraesCS1B01G119100	-1.1571	-0.8801
TraesCS1B01G123600	-1.5132	-1.2549
TraesCS1B01G126900	0.76843	1.0296
TraesCS1B01G127000	-1.0805	-1.3232
TraesCS1B01G130100	2.4258	2.7614
TraesCS1B01G131700	#NAME?	-5.2032
TraesCS1B01G132000	2.835	3.4231
TraesCS1B01G132600	-0.67431	-0.56902
TraesCS1B01G135100	3.4287	3.1901
TraesCS1B01G138700	3.1908	2.3049
TraesCS1B01G139900	1.4147	1.5069
TraesCS1B01G140900	-0.48901	-0.65995
TraesCS1B01G141900	-0.44129	-0.4073
TraesCS1B01G142600	0.57593	0.81812
TraesCS1B01G144300	0.75984	0.6273
TraesCS1B01G146500	-1.447	-0.56685
TraesCS1B01G148600	-0.77602	-0.84935
TraesCS1B01G148900	-0.7452	-0.7534
TraesCS1B01G149900	-1.0077	-1.2489
TraesCS1B01G150000	-0.61195	-0.66241
TraesCS1B01G151900	-0.78562	-0.42557
TraesCS1B01G152000	-0.82708	-0.98242
TraesCS1B01G152200	-0.8716	-0.94118
TraesCS1B01G152300	-0.89189	-0.63445
TraesCS1B01G153400	-0.52734	-0.4698
TraesCS1B01G153600	-0.64072	-0.56435
TraesCS1B01G154100	-0.58101	-0.53816
TraesCS1B01G159100	-1.1704	-0.73899
TraesCS1B01G163400	-0.49387	-0.51451
TraesCS1B01G164900	-0.85439	-0.46448
TraesCS1B01G168100	0.62262	0.61973
TraesCS1B01G168200	-0.50819	-0.61725
TraesCS1B01G172100	Inf	Inf
TraesCS1B01G172300	-1.0905	-0.94082
TraesCS1B01G173300	-0.97883	-0.87183
TraesCS1B01G173900	-0.98325	-0.81492
TraesCS1B01G174100	1.6771	1.9608
TraesCS1B01G179200	-0.81687	-0.95565
TraesCS1B01G180200	-1.6772	-1.466
TraesCS1B01G180300	-1.2158	-1.2486
TraesCS1B01G184600	3.1767	3.153
TraesCS1B01G184700	1.0018	1.1706
TraesCS1B01G184900	Inf	Inf
TraesCS1B01G185100	-1.19	-1.1822
TraesCS1B01G185900	2.9714	3.8518
TraesCS1B01G186700	2.0674	1.5934
TraesCS1B01G187100	-0.37547	-0.40206
TraesCS1B01G187500	2.9482	2.9304
TraesCS1B01G188000	-0.37416	-0.41567
TraesCS1B01G192000	-1.9565	-1.3407
TraesCS1B01G196000	-0.37739	-0.45449
TraesCS1B01G196900	2.1342	1.4439
TraesCS1B01G198400	0.94724	0.89419
TraesCS1B01G199600	4.8267	4.047
TraesCS1B01G205400	-0.65707	-0.9498
TraesCS1B01G206300	-0.49565	-0.59101
TraesCS1B01G206600	2.3648	3.0037
TraesCS1B01G206800	2.997	3.4802
TraesCS1B01G206900	1.1354	1.4037
TraesCS1B01G207000	0.63021	1.0892
TraesCS1B01G207100	1.8851	1.3399
TraesCS1B01G209100	1.3119	1.5426
TraesCS1B01G209300	0.74007	0.68749
TraesCS1B01G209400	3.5843	3.394
TraesCS1B01G211800	-0.65024	-0.79794
TraesCS1B01G213600	1.4572	1.6277
TraesCS1B01G217700	#NAME?	#NAME?
TraesCS1B01G218900	-0.5886	-0.62833
TraesCS1B01G220800	2.3989	3.3067
TraesCS1B01G222600	-0.51366	-0.65252
TraesCS1B01G223400	1.8407	1.913
TraesCS1B01G223600	0.92143	1.4404
TraesCS1B01G224100	-0.48443	-0.59825
TraesCS1B01G227800	2.7719	2.2285
TraesCS1B01G228600	5.2416	4.285
TraesCS1B01G228800	2.9306	3.5024
TraesCS1B01G228900	-0.97523	-1.0216
TraesCS1B01G231000	4.9297	4.7692
TraesCS1B01G232700	5.8953	5.7887
TraesCS1B01G233600	6.6608	6.7682
TraesCS1B01G236300	-1.0328	-0.92919
TraesCS1B01G237100	0.66913	0.57543
TraesCS1B01G240600	1.0458	1.1021
TraesCS1B01G241500	4.3497	5.2034
TraesCS1B01G241900	-0.69229	-0.61491
TraesCS1B01G242200	1.1902	1.0445
TraesCS1B01G243000	-1.8485	-1.4972
TraesCS1B01G243300	-1.1109	-0.80011
TraesCS1B01G244000	1.0659	1.1651
TraesCS1B01G244100	-0.7504	-0.73864
TraesCS1B01G245100	1.8756	2.2359
TraesCS1B01G249700	0.43242	0.62479
TraesCS1B01G252700	-0.91756	-0.46354
TraesCS1B01G255000	1.4629	1.7873
TraesCS1B01G255800	0.98077	0.52141
TraesCS1B01G257000	0.69416	0.80663
TraesCS1B01G258300	-0.574	-0.55177
TraesCS1B01G258500	2.4324	2.2137
TraesCS1B01G264300	0.85489	0.93647
TraesCS1B01G266500	2.4203	2.9813
TraesCS1B01G268500	1.2083	0.7869
TraesCS1B01G271300	1.2899	1.1319
TraesCS1B01G271700	-0.90028	-0.72491
TraesCS1B01G271800	-0.29743	-0.43463
TraesCS1B01G272200	-0.93633	-0.67174
TraesCS1B01G279100	3.9556	4.8398
TraesCS1B01G279600	-0.52297	-0.55919
TraesCS1B01G280100	1.347	1.1331
TraesCS1B01G281600	1.9456	2.0652
TraesCS1B01G284200	1.2357	0.92463
TraesCS1B01G284500	1.4205	1.3193
TraesCS1B01G286600	-0.61594	-0.53107
TraesCS1B01G289600	1.2001	1.3197
TraesCS1B01G290200	0.70905	1.0089
TraesCS1B01G294400	-0.55231	-0.58498
TraesCS1B01G296000	4.064	3.1216
TraesCS1B01G296400	Inf	Inf
TraesCS1B01G296600	5.2256	5.1971
TraesCS1B01G296900	1.4757	1.5911
TraesCS1B01G297800	-0.48727	-0.53009
TraesCS1B01G298000	-0.73537	-0.43925
TraesCS1B01G305800	1.3873	1.9988
TraesCS1B01G306500	1.4346	1.8482
TraesCS1B01G307400	1.6178	1.4747
TraesCS1B01G307800	6.6507	6.1945
TraesCS1B01G315900	-2.419	-2.3608
TraesCS1B01G316400	0.77156	0.93738
TraesCS1B01G322900	-0.46846	-0.39403
TraesCS1B01G323000	-1.3476	-1.1515
TraesCS1B01G324300	0.57688	0.54904
TraesCS1B01G324500	-1.0949	-0.93062
TraesCS1B01G327400	4.1029	3.8026
TraesCS1B01G327500	-0.87507	-0.74787
TraesCS1B01G330000	1.1611	1.561
TraesCS1B01G334600	-0.61012	-0.35074
TraesCS1B01G336000	0.74994	0.72283
TraesCS1B01G337400	1.0838	1.5633
TraesCS1B01G338800	-0.59201	-0.42183
TraesCS1B01G341900	2.3274	1.7945
TraesCS1B01G342500	4.3114	4.0114
TraesCS1B01G343900	-0.52423	-0.39724
TraesCS1B01G345300	-0.97462	-1.0241
TraesCS1B01G346100	-1.7647	-1.1654
TraesCS1B01G349100	Inf	Inf
TraesCS1B01G351200	3.8693	3.9962
TraesCS1B01G352000	3.5843	3.1243
TraesCS1B01G352400	1.5199	2.2998
TraesCS1B01G353700	3.5853	3.6216
TraesCS1B01G353900	2.8395	3.136
TraesCS1B01G359500	2.2793	2.243
TraesCS1B01G361000	1.6794	1.7603
TraesCS1B01G361300	0.76691	0.6394
TraesCS1B01G361400	1.283	1.5862
TraesCS1B01G361700	3.093	3.2342
TraesCS1B01G364800	-0.64304	-0.47388
TraesCS1B01G365100	1.5473	1.5593
TraesCS1B01G366300	Inf	Inf
TraesCS1B01G366900	3.219	4.7025
TraesCS1B01G372400	-0.70404	-1.0974
TraesCS1B01G376000	-3.6598	-2.9918
TraesCS1B01G379300	4.9446	4.1965
TraesCS1B01G382100	1.4877	1.3718
TraesCS1B01G386700	-2.5673	-1.8832
TraesCS1B01G386900	2.0318	2.1894
TraesCS1B01G387200	Inf	Inf
TraesCS1B01G388300	6.1694	5.686
TraesCS1B01G388500	Inf	Inf
TraesCS1B01G390000	-0.38753	-0.43546
TraesCS1B01G396700	Inf	Inf
TraesCS1B01G399000	-0.5332	-0.56103
TraesCS1B01G401400	1.4549	2.7151
TraesCS1B01G407500	-3.1377	-2.4076
TraesCS1B01G409300	2.5726	2.631
TraesCS1B01G414800	4.2908	4.2837
TraesCS1B01G425700	1.2726	1.2799
TraesCS1B01G432600	0.50446	0.56155
TraesCS1B01G438600	-1.1206	-0.93746
TraesCS1B01G439700	0.94877	1.1662
TraesCS1B01G442600	Inf	Inf
TraesCS1B01G444600	1.6464	1.2335
TraesCS1B01G450600	-1.4816	-1.5294
TraesCS1B01G451100	Inf	Inf
TraesCS1B01G452400	3.3675	3.4111
TraesCS1B01G453700	-0.43546	-0.56126
TraesCS1B01G456200	-0.46387	-1.0689
TraesCS1B01G456800	Inf	Inf
TraesCS1B01G459500	-0.6864	-0.82089
TraesCS1B01G463400	-0.66524	-0.59917
TraesCS1B01G465100	-0.54482	-0.84721
TraesCS1B01G468700	1.0025	0.95714
TraesCS1B01G469200	-0.64643	-0.82589
TraesCS1B01G472000	-0.39704	-0.4345
TraesCS1B01G474100	0.65044	0.70831
TraesCS1B01G474900	1.0761	1.4861
TraesCS1B01G475000	1.7593	1.473
TraesCS1B01G475800	1.4921	1.4927
TraesCS1B01G477400	0.53118	0.35428
TraesCS1B01G478800	0.65477	1.1345
TraesCS1B01G479700	3.0989	2.7269
TraesCS1D01G000800	0.79857	1.4979
TraesCS1D01G002900	2.5685	3.0359
TraesCS1D01G003300	0.61218	0.78772
TraesCS1D01G003900	0.76393	0.72227
TraesCS1D01G004800	Inf	Inf
TraesCS1D01G005800	-3.3166	-2.0093
TraesCS1D01G009200	1.9926	1.9096
TraesCS1D01G009300	1.9273	1.795
TraesCS1D01G012800	-1.8833	-1.2455
TraesCS1D01G018100	#NAME?	-4.9012
TraesCS1D01G018300	0.53203	0.69659
TraesCS1D01G018400	-0.63167	-0.70053
TraesCS1D01G024400	-0.71202	-0.58872
TraesCS1D01G037000	4.4656	4.4062
TraesCS1D01G039000	1.9618	2.2107
TraesCS1D01G040000	#NAME?	-4.6613
TraesCS1D01G040800	-0.75322	-0.63315
TraesCS1D01G043700	-0.44092	-0.69022
TraesCS1D01G047400	-0.52911	-0.37562
TraesCS1D01G047600	-0.4395	-0.50714
TraesCS1D01G048100	4.0284	3.4617
TraesCS1D01G054900	2.56	2.5207
TraesCS1D01G057200	-0.76035	-0.97778
TraesCS1D01G058900	-0.28811	-0.53865
TraesCS1D01G059100	3.6774	3.6879
TraesCS1D01G067200	2.1051	1.5698
TraesCS1D01G072000	-0.45472	-0.57231
TraesCS1D01G072200	2.5246	2.3642
TraesCS1D01G072800	0.76825	0.75284
TraesCS1D01G074400	-0.4469	-0.80149
TraesCS1D01G077400	0.66977	0.97932
TraesCS1D01G082800	1.4464	1.1782
TraesCS1D01G084600	0.91098	0.81502
TraesCS1D01G086600	0.86757	0.81684
TraesCS1D01G087800	1.1495	0.92095
TraesCS1D01G089500	0.67577	0.67322
TraesCS1D01G091700	4.546	4.5933
TraesCS1D01G093500	-2.241	-1.7404
TraesCS1D01G094900	5.2069	4.6483
TraesCS1D01G098000	1.8632	1.5052
TraesCS1D01G099700	-1.1179	-1.1066
TraesCS1D01G107200	0.71577	0.40435
TraesCS1D01G107500	-1.3049	-0.63353
TraesCS1D01G108300	1.2917	1.3446
TraesCS1D01G108700	-0.58979	-0.90995
TraesCS1D01G109100	0.85277	0.86762
TraesCS1D01G109900	1.054	1.2798
TraesCS1D01G110900	-0.52132	-0.42416
TraesCS1D01G111100	1.0057	1.4038
TraesCS1D01G111500	-0.85261	-0.57107
TraesCS1D01G112500	1.0798	0.85997
TraesCS1D01G114600	-1.5124	-1.679
TraesCS1D01G120000	1.8177	1.8064
TraesCS1D01G121500	1.3309	1.3696
TraesCS1D01G122200	-0.59417	-0.56884
TraesCS1D01G123900	-0.9272	-0.78742
TraesCS1D01G124300	-0.60056	-0.57112
TraesCS1D01G126700	-0.61656	-0.76571
TraesCS1D01G127800	Inf	Inf
TraesCS1D01G129000	-0.9189	-0.62379
TraesCS1D01G129200	-0.99953	-0.40872
TraesCS1D01G131000	-0.56388	-0.61771
TraesCS1D01G133900	1.569	1.4908
TraesCS1D01G135200	-0.72559	-0.93436
TraesCS1D01G135300	-0.58903	-0.58524
TraesCS1D01G135400	-0.49507	-0.49667
TraesCS1D01G135500	-0.51311	-0.49167
TraesCS1D01G136500	-0.67476	-0.7617
TraesCS1D01G136800	-0.46102	-0.52712
TraesCS1D01G137000	-0.52035	-0.48731
TraesCS1D01G137500	-0.70844	-0.838
TraesCS1D01G141400	1.2896	0.9898
TraesCS1D01G142700	1.8972	1.8032
TraesCS1D01G146500	0.58566	0.703
TraesCS1D01G146600	2.6296	2.643
TraesCS1D01G153300	-0.83873	-0.75177
TraesCS1D01G154800	-0.63398	-0.61135
TraesCS1D01G157800	-0.75189	-1.0164
TraesCS1D01G162400	0.97159	0.73494
TraesCS1D01G162500	-0.36183	-0.47016
TraesCS1D01G169900	1.5763	1.9463
TraesCS1D01G175300	-0.73186	-0.9439
TraesCS1D01G177000	4.4593	3.971
TraesCS1D01G177800	2.0141	1.8666
TraesCS1D01G178200	1.4847	1.103
TraesCS1D01G185700	1.6802	1.5271
TraesCS1D01G187300	-0.9707	-0.85909
TraesCS1D01G188100	-0.69871	-0.63386
TraesCS1D01G190700	-1.6336	-1.3769
TraesCS1D01G191900	1.7758	1.5413
TraesCS1D01G192800	-1.22	-1.4057
TraesCS1D01G194800	-0.82964	-0.85125
TraesCS1D01G195500	1.1685	1.2544
TraesCS1D01G196700	-0.62503	-0.70272
TraesCS1D01G198000	1.0422	1.0734
TraesCS1D01G198200	3.3965	3.4816
TraesCS1D01G198700	-0.93736	-0.55671
TraesCS1D01G200500	-0.80539	-0.81651
TraesCS1D01G200800	-0.66414	-0.42807
TraesCS1D01G201000	0.59025	0.79334
TraesCS1D01G206700	1.8524	2.7755
TraesCS1D01G211800	-0.69203	-0.65518
TraesCS1D01G212800	1.1852	1.6848
TraesCS1D01G213000	0.70258	1.1259
TraesCS1D01G216400	1.8071	2.3129
TraesCS1D01G217200	-0.92947	-0.88732
TraesCS1D01G217700	5.7539	4.0651
TraesCS1D01G217900	-1.0094	-0.95754
TraesCS1D01G218900	2.3748	2.2136
TraesCS1D01G220400	0.65604	0.69602
TraesCS1D01G221800	Inf	Inf
TraesCS1D01G223400	1.9452	2.8461
TraesCS1D01G223500	1.295	0.86776
TraesCS1D01G224600	-0.97967	-0.95271
TraesCS1D01G225400	0.50408	0.55837
TraesCS1D01G229300	-0.38813	-0.54317
TraesCS1D01G229600	1.8223	1.5388
TraesCS1D01G231000	-0.69734	-0.58086
TraesCS1D01G231800	0.77518	0.99273
TraesCS1D01G232000	-1.0858	-0.71973
TraesCS1D01G233100	2.2075	2.2957
TraesCS1D01G235800	-0.62004	-0.54194
TraesCS1D01G239300	-0.90183	-1.0063
TraesCS1D01G240300	2.8916	2.7053
TraesCS1D01G240700	-0.79255	-0.46375
TraesCS1D01G242600	0.98917	1.0235
TraesCS1D01G245600	1.3176	1.376
TraesCS1D01G247800	-0.48322	-0.40687
TraesCS1D01G249700	1.9075	2.0358
TraesCS1D01G250000	1.6	1.7265
TraesCS1D01G250500	-0.4403	-0.46472
TraesCS1D01G250700	0.52727	0.72511
TraesCS1D01G251100	-0.50864	-0.41532
TraesCS1D01G251700	4.3449	3.8698
TraesCS1D01G253500	6.2444	6.0918
TraesCS1D01G255500	-1.1121	-0.61219
TraesCS1D01G255700	-0.47575	-0.33126
TraesCS1D01G255800	-0.56008	-0.39925
TraesCS1D01G256400	1.4919	1.2522
TraesCS1D01G260900	-0.85578	-0.43041
TraesCS1D01G261400	1.2175	1.6669
TraesCS1D01G262400	1.4516	1.3392
TraesCS1D01G265200	-2.381	-1.7187
TraesCS1D01G270600	0.48572	0.51373
TraesCS1D01G270900	1.5957	1.4682
TraesCS1D01G271400	4.2107	4.0788
TraesCS1D01G274800	-1.1309	-0.5248
TraesCS1D01G277000	0.92284	0.79088
TraesCS1D01G279700	1.3467	1.8506
TraesCS1D01G281800	1.8191	1.3124
TraesCS1D01G282300	1.9092	1.8689
TraesCS1D01G283400	-2.0781	-2.3244
TraesCS1D01G284000	2.4247	0.98605
TraesCS1D01G285800	0.90607	0.97306
TraesCS1D01G285900	Inf	Inf
TraesCS1D01G288600	-1.9343	-2.8672
TraesCS1D01G293300	1.3882	1.2182
TraesCS1D01G294600	2.2639	2.4297
TraesCS1D01G295000	1.3474	1.0569
TraesCS1D01G296300	2.724	1.8829
TraesCS1D01G296600	1.9059	1.7801
TraesCS1D01G297200	1.1105	1.2881
TraesCS1D01G304800	-1.9957	-1.4962
TraesCS1D01G305000	1.7439	1.7566
TraesCS1D01G305700	4.7278	5.3432
TraesCS1D01G306200	4.4633	4.7621
TraesCS1D01G309100	5.6496	5.599
TraesCS1D01G310100	0.87087	0.9353
TraesCS1D01G311400	-0.58283	-0.52951
TraesCS1D01G315800	-0.66798	-0.66712
TraesCS1D01G316900	-0.96965	-0.9446
TraesCS1D01G317300	2.7798	2.2141
TraesCS1D01G324700	-1.8627	-1.7138
TraesCS1D01G325300	1.1591	1.6328
TraesCS1D01G327500	-0.81675	-1.736
TraesCS1D01G327700	-0.29382	-0.44662
TraesCS1D01G330400	-1.5916	-1.7614
TraesCS1D01G330600	2.9346	2.4569
TraesCS1D01G331400	1.3517	1.3959
TraesCS1D01G332700	-0.44976	-0.35912
TraesCS1D01G334800	1.3919	1.8566
TraesCS1D01G338100	Inf	Inf
TraesCS1D01G340600	3.8501	3.545
TraesCS1D01G340900	4.2966	3.9076
TraesCS1D01G341700	1.8048	2.0533
TraesCS1D01G342100	1.2691	0.99743
TraesCS1D01G352000	3.9241	3.5715
TraesCS1D01G355200	0.41441	0.4265
TraesCS1D01G355500	2.5631	2.2433
TraesCS1D01G356800	5.6709	6.7033
TraesCS1D01G361900	0.55762	0.40037
TraesCS1D01G363500	-1.0462	-0.90383
TraesCS1D01G368200	-1.2471	-0.78963
TraesCS1D01G369800	5.2665	6.3465
TraesCS1D01G370300	1.2031	0.99244
TraesCS1D01G374200	Inf	Inf
TraesCS1D01G374900	Inf	Inf
TraesCS1D01G375000	10.284	10.036
TraesCS1D01G378200	0.84379	0.54423
TraesCS1D01G381400	-0.99894	-1.0689
TraesCS1D01G382100	#NAME?	-2.5467
TraesCS1D01G385200	-0.52895	-0.60002
TraesCS1D01G386800	1.8383	2.4925
TraesCS1D01G387100	1.4754	1.5533
TraesCS1D01G388600	-1.5559	-1.0462
TraesCS1D01G388900	2.007	1.9038
TraesCS1D01G390600	1.5743	1.1252
TraesCS1D01G391600	1.9546	1.8763
TraesCS1D01G395100	Inf	Inf
TraesCS1D01G395200	1.9859	2.8009
TraesCS1D01G395600	0.81351	1.2901
TraesCS1D01G396800	1.3619	1.9527
TraesCS1D01G398400	1.6223	1.392
TraesCS1D01G398600	-0.89253	-0.79004
TraesCS1D01G399000	-0.54083	-0.49075
TraesCS1D01G403500	1.926	1.4352
TraesCS1D01G405800	-0.62472	-0.63576
TraesCS1D01G405900	3.0862	3.0929
TraesCS1D01G407800	1.4347	1.145
TraesCS1D01G408100	-0.33608	-0.37281
TraesCS1D01G410800	0.8849	0.60968
TraesCS1D01G411600	6.2624	6.0738
TraesCS1D01G416700	2.4053	1.8713
TraesCS1D01G417000	1.6608	1.5168
TraesCS1D01G421100	0.48058	0.8523
TraesCS1D01G421900	3.4835	3.5152
TraesCS1D01G426100	1.1068	1.0763
TraesCS1D01G429200	2.0864	1.424
TraesCS1D01G430600	-0.80165	-0.8508
TraesCS1D01G432300	1.9821	2.2463
TraesCS1D01G433500	Inf	Inf
TraesCS1D01G436200	-1.5416	-1.6733
TraesCS1D01G437900	0.9785	0.98616
TraesCS1D01G438000	-0.85554	-0.74019
TraesCS1D01G439600	-0.63532	-0.82559
TraesCS1D01G445200	-0.46519	-0.49852
TraesCS1D01G447700	1.203	1.2578
TraesCS1D01G447900	2.6155	2.3211
TraesCS1D01G449000	1.622	2.499
TraesCS1D01G451500	-1.8547	-1.6666
TraesCS2A01G004000	-1.505	-1.1811
TraesCS2A01G005200	-1.7508	-1.0906
TraesCS2A01G007500	2.4756	2.9422
TraesCS2A01G009300	4.7056	5.1677
TraesCS2A01G009400	-0.64433	-0.94577
TraesCS2A01G011300	-0.70316	-0.77609
TraesCS2A01G014200	0.65881	0.74688
TraesCS2A01G016700	-1.3345	-0.80963
TraesCS2A01G028400	1.2273	0.8526
TraesCS2A01G028600	3.3237	2.9895
TraesCS2A01G031600	2.378	2.5454
TraesCS2A01G034800	1.351	1.4597
TraesCS2A01G036300	0.59652	0.64818
TraesCS2A01G036400	1.1937	1.5285
TraesCS2A01G037400	0.28916	0.61566
TraesCS2A01G044900	2.5546	2.7581
TraesCS2A01G045200	#NAME?	-5.1687
TraesCS2A01G046600	1.2121	1.5573
TraesCS2A01G066100	0.40003	0.51532
TraesCS2A01G067300	1.8573	2.3145
TraesCS2A01G069200	1.9443	2.1084
TraesCS2A01G069800	0.9652	0.88036
TraesCS2A01G070200	3.1254	3.8581
TraesCS2A01G070800	Inf	Inf
TraesCS2A01G071500	3.2754	3.0124
TraesCS2A01G076900	1.4441	1.3308
TraesCS2A01G079300	-0.74821	-0.82505
TraesCS2A01G080000	2.1551	2.7712
TraesCS2A01G080700	-0.93148	-0.85364
TraesCS2A01G081900	1.8303	2.0483
TraesCS2A01G082200	1.3703	0.98736
TraesCS2A01G084100	#NAME?	#NAME?
TraesCS2A01G084800	2.9324	3.581
TraesCS2A01G086900	2.1691	2.2513
TraesCS2A01G087100	1.959	2.4407
TraesCS2A01G088500	2.3284	1.658
TraesCS2A01G089400	3.185	2.7817
TraesCS2A01G092200	2.0409	2.0452
TraesCS2A01G096900	-0.75515	-0.73707
TraesCS2A01G098800	2.7497	2.8872
TraesCS2A01G099900	2.3883	2.6075
TraesCS2A01G100300	4.1074	3.2881
TraesCS2A01G103000	-0.62861	-0.62879
TraesCS2A01G105500	-1.7295	-1.0827
TraesCS2A01G107100	1.8892	1.4696
TraesCS2A01G110500	0.92806	0.96569
TraesCS2A01G113600	3.5191	4.2483
TraesCS2A01G114300	2.3312	2.0142
TraesCS2A01G115100	0.59647	0.6288
TraesCS2A01G116700	-0.65608	-0.4652
TraesCS2A01G117300	-1.3259	-1.3302
TraesCS2A01G122200	-0.67103	-0.85187
TraesCS2A01G124100	3.1121	2.6629
TraesCS2A01G124400	2.7098	2.9784
TraesCS2A01G125400	-1.4111	-1.2837
TraesCS2A01G125700	-0.58032	-0.69217
TraesCS2A01G126800	-0.9068	-0.83943
TraesCS2A01G128200	2.3716	3.3097
TraesCS2A01G128700	0.84987	0.65834
TraesCS2A01G131400	-1.0043	-0.75054
TraesCS2A01G132600	1.2431	1.6664
TraesCS2A01G133600	-2.4969	-2.0107
TraesCS2A01G134300	3.7771	3.9088
TraesCS2A01G142700	-0.95541	-0.61201
TraesCS2A01G142900	0.5695	0.75504
TraesCS2A01G143300	2.5538	3.3619
TraesCS2A01G143500	3.9113	4.2743
TraesCS2A01G144300	Inf	Inf
TraesCS2A01G145900	1.0567	1.4487
TraesCS2A01G146000	0.88134	0.56488
TraesCS2A01G148200	#NAME?	#NAME?
TraesCS2A01G155300	1.3322	1.321
TraesCS2A01G155600	0.57453	0.50981
TraesCS2A01G156300	2.4258	2.2784
TraesCS2A01G157000	-0.86398	-0.58937
TraesCS2A01G158000	-1.4453	-1.0708
TraesCS2A01G159000	1.9375	2.5444
TraesCS2A01G160400	2.2843	3.004
TraesCS2A01G163100	1.9224	1.8012
TraesCS2A01G163700	0.61985	0.58207
TraesCS2A01G165000	-0.91716	-0.58211
TraesCS2A01G166500	-1.0957	-0.64022
TraesCS2A01G167300	3.12	3.1614
TraesCS2A01G172600	2.0151	2.2693
TraesCS2A01G172900	#NAME?	-4.8653
TraesCS2A01G173800	1.7407	1.9347
TraesCS2A01G174400	0.68608	0.84984
TraesCS2A01G174700	1.6594	1.9753
TraesCS2A01G176600	2.6021	2.621
TraesCS2A01G177500	-2.3423	-1.6281
TraesCS2A01G180900	#NAME?	#NAME?
TraesCS2A01G182500	-1.4034	-1.4673
TraesCS2A01G182600	-1.536	-1.259
TraesCS2A01G183600	2.8646	2.9799
TraesCS2A01G184000	1.4429	1.2037
TraesCS2A01G184900	-1.0669	-0.79346
TraesCS2A01G189400	-0.53237	-0.55737
TraesCS2A01G189900	Inf	Inf
TraesCS2A01G190000	3.5928	3.3794
TraesCS2A01G191700	3.6178	4.1083
TraesCS2A01G192100	1.8477	2.0398
TraesCS2A01G193900	3.3444	2.9894
TraesCS2A01G194500	1.3144	1.8737
TraesCS2A01G195600	3.0764	2.959
TraesCS2A01G198400	-0.37047	-0.74266
TraesCS2A01G198900	2.5634	2.5357
TraesCS2A01G199400	-0.83002	-0.73002
TraesCS2A01G200000	-0.64202	-0.5008
TraesCS2A01G200300	1.3925	1.3918
TraesCS2A01G201200	0.89532	0.86901
TraesCS2A01G202200	3.0524	3.0856
TraesCS2A01G203500	5.4672	4.3347
TraesCS2A01G204800	Inf	Inf
TraesCS2A01G205900	3.4274	2.5159
TraesCS2A01G206100	-0.92431	-0.50538
TraesCS2A01G210600	-4.5322	-2.8153
TraesCS2A01G211400	-3.91	-3.0104
TraesCS2A01G214000	2.6289	2.541
TraesCS2A01G214100	-1.3638	-1.2876
TraesCS2A01G215300	3.1562	2.5288
TraesCS2A01G219000	-1.9654	-1.3137
TraesCS2A01G223000	-0.54154	-0.39494
TraesCS2A01G223100	-0.48758	-0.54321
TraesCS2A01G225600	-0.42642	-0.55754
TraesCS2A01G225900	0.9792	0.76425
TraesCS2A01G226200	-1.4246	-1.046
TraesCS2A01G226700	-0.64447	-0.57528
TraesCS2A01G227000	0.90664	0.70167
TraesCS2A01G227200	-0.75384	-0.70405
TraesCS2A01G227900	-0.3223	-0.61622
TraesCS2A01G229200	-2.8481	-2.5245
TraesCS2A01G236200	0.38197	0.72405
TraesCS2A01G238600	-0.74369	-0.72751
TraesCS2A01G239000	-0.92787	-0.91564
TraesCS2A01G239900	-0.60443	-0.60263
TraesCS2A01G240000	-0.64233	-0.81194
TraesCS2A01G240200	0.44988	0.46968
TraesCS2A01G246400	-1.5554	-1.3582
TraesCS2A01G246500	-1.7149	-1.4369
TraesCS2A01G249100	-0.26898	-0.4952
TraesCS2A01G249400	0.91572	0.95332
TraesCS2A01G250600	Inf	Inf
TraesCS2A01G251600	2.3401	2.0119
TraesCS2A01G252100	-1.6426	-1.4361
TraesCS2A01G253800	1.3795	1.0983
TraesCS2A01G254800	-0.60943	-0.58807
TraesCS2A01G258200	-1.0993	-1.364
TraesCS2A01G259400	-1.0769	-1.0696
TraesCS2A01G259900	1.4524	1.8827
TraesCS2A01G260100	-0.66781	-0.61875
TraesCS2A01G262000	-0.34531	-0.42667
TraesCS2A01G262400	1.3288	1.0929
TraesCS2A01G270500	2.0104	1.6309
TraesCS2A01G276200	-1.9334	-1.5826
TraesCS2A01G281500	0.68594	0.44622
TraesCS2A01G282600	3.6526	3.7514
TraesCS2A01G283700	-1.3892	-1.5967
TraesCS2A01G284200	-0.5264	-0.53124
TraesCS2A01G285500	-0.40038	-0.44902
TraesCS2A01G287300	-0.4729	-0.46592
TraesCS2A01G290000	1.2794	1.3087
TraesCS2A01G291100	-0.94025	-1.0392
TraesCS2A01G292600	-2.1783	-1.361
TraesCS2A01G293300	1.3336	1.5709
TraesCS2A01G294000	0.54815	0.48049
TraesCS2A01G294600	3.3662	4.2406
TraesCS2A01G298100	2.1545	2.5142
TraesCS2A01G298800	1.1367	1.1346
TraesCS2A01G299500	Inf	Inf
TraesCS2A01G300000	-2.0502	-1.7649
TraesCS2A01G300400	1.7689	1.8103
TraesCS2A01G303600	1.1991	1.2326
TraesCS2A01G304600	-1.1988	-1.3455
TraesCS2A01G304700	Inf	Inf
TraesCS2A01G307700	0.74171	0.6206
TraesCS2A01G313400	7.8217	8.1381
TraesCS2A01G313700	-0.51066	-0.91898
TraesCS2A01G317400	Inf	Inf
TraesCS2A01G317800	1.9217	1.1524
TraesCS2A01G318000	-1.0121	-0.90071
TraesCS2A01G318200	6.2994	5.3469
TraesCS2A01G318600	-1.4315	-1.4913
TraesCS2A01G321600	-0.91939	-1.069
TraesCS2A01G324000	Inf	Inf
TraesCS2A01G325500	1.7445	1.4106
TraesCS2A01G329900	0.53263	0.32863
TraesCS2A01G331500	-1.8998	-1.7341
TraesCS2A01G334600	-0.977	-0.92545
TraesCS2A01G337100	2.0405	1.7456
TraesCS2A01G340900	-2.3303	-1.4429
TraesCS2A01G341700	2.021	2.3631
TraesCS2A01G341800	0.3378	0.37591
TraesCS2A01G343600	2.2918	2.6566
TraesCS2A01G344800	-2.0162	-1.8656
TraesCS2A01G345700	4.6998	4.2807
TraesCS2A01G347400	2.2674	1.6864
TraesCS2A01G348200	2.5096	2.1813
TraesCS2A01G348900	4.8799	4.8688
TraesCS2A01G349100	2.6365	2.9542
TraesCS2A01G349800	-0.54137	-0.57905
TraesCS2A01G350700	0.92377	0.80169
TraesCS2A01G353200	-0.58996	-0.63437
TraesCS2A01G357500	-1.1843	-0.8663
TraesCS2A01G359300	5.393	4.1655
TraesCS2A01G360200	2.235	1.3121
TraesCS2A01G361700	-0.89788	-0.80742
TraesCS2A01G362200	1.1731	1.6276
TraesCS2A01G362400	4.2442	3.1751
TraesCS2A01G362500	4.841	3.7884
TraesCS2A01G363300	-0.51259	-0.53995
TraesCS2A01G365500	-1.3652	-1.297
TraesCS2A01G368800	2.8894	2.3346
TraesCS2A01G369700	1.095	0.93235
TraesCS2A01G374500	-1.171	-0.92877
TraesCS2A01G375100	6.1353	4.5628
TraesCS2A01G376200	-0.57976	-0.73212
TraesCS2A01G378100	1.457	1.3424
TraesCS2A01G379600	2.9277	2.6057
TraesCS2A01G384700	1.0731	1.0127
TraesCS2A01G384800	2.5768	1.85
TraesCS2A01G386400	3.0986	2.908
TraesCS2A01G388300	1.3662	1.572
TraesCS2A01G391900	-0.82385	-1.064
TraesCS2A01G393700	1.5735	1.0627
TraesCS2A01G394700	4.6063	4.3696
TraesCS2A01G395400	0.82156	0.86326
TraesCS2A01G395500	0.81622	1.0826
TraesCS2A01G398400	#NAME?	-2.6604
TraesCS2A01G399000	-1.9327	-1.6882
TraesCS2A01G400000	1.9049	2.2673
TraesCS2A01G400900	-1.1059	-1.0477
TraesCS2A01G403600	2.0155	2.0079
TraesCS2A01G404000	-2.252	-1.2078
TraesCS2A01G404200	-0.77362	-1.0732
TraesCS2A01G406100	-1.4157	-1.1153
TraesCS2A01G412200	-1.596	-1.386
TraesCS2A01G414500	-1.4172	-1.0168
TraesCS2A01G414700	1.3908	1.3407
TraesCS2A01G415100	4.075	3.0287
TraesCS2A01G417300	2.9127	3.4301
TraesCS2A01G419500	2.3914	3.0253
TraesCS2A01G420900	-0.97509	-0.84983
TraesCS2A01G423400	-0.62123	-0.52984
TraesCS2A01G424700	0.28329	0.34745
TraesCS2A01G425900	1.5593	1.4255
TraesCS2A01G430400	6.6094	5.0292
TraesCS2A01G431400	0.74205	1.0383
TraesCS2A01G432100	-0.45421	-0.47932
TraesCS2A01G432200	Inf	Inf
TraesCS2A01G432500	4.2288	3.3437
TraesCS2A01G437300	2.0266	1.8327
TraesCS2A01G438500	1.2134	1.0252
TraesCS2A01G447300	Inf	Inf
TraesCS2A01G450000	Inf	Inf
TraesCS2A01G453700	1.7075	0.83218
TraesCS2A01G454300	5.7821	5.5451
TraesCS2A01G455400	1.1612	2.0417
TraesCS2A01G455900	-0.90355	-0.92876
TraesCS2A01G459300	4.8954	4.3872
TraesCS2A01G461600	-0.74303	-0.47587
TraesCS2A01G464600	0.8721	0.92232
TraesCS2A01G467100	0.81022	0.97993
TraesCS2A01G471500	2.7462	2.362
TraesCS2A01G478300	-0.63348	-0.66275
TraesCS2A01G479100	2.5762	2.4427
TraesCS2A01G485100	2.452	2.7228
TraesCS2A01G485300	1.986	1.5991
TraesCS2A01G485500	-1.2024	-0.85954
TraesCS2A01G485700	1.8774	1.907
TraesCS2A01G489000	5.5577	5.8461
TraesCS2A01G489500	3.0069	2.1101
TraesCS2A01G495600	-0.80958	-0.7267
TraesCS2A01G498000	-0.55674	-0.59727
TraesCS2A01G500200	-0.61238	-1.166
TraesCS2A01G506000	3.4317	3.2354
TraesCS2A01G506500	-0.83753	-0.65892
TraesCS2A01G507200	1.5399	1.5611
TraesCS2A01G508800	-2.8776	-1.0963
TraesCS2A01G510100	-2.8201	-2.7472
TraesCS2A01G510300	-2.4565	-1.6885
TraesCS2A01G511300	1.9432	1.9
TraesCS2A01G512100	-1.384	-1.1703
TraesCS2A01G512400	3.6428	3.4451
TraesCS2A01G513200	3.2804	3.2427
TraesCS2A01G514200	0.52956	0.90397
TraesCS2A01G515300	#NAME?	#NAME?
TraesCS2A01G517100	0.25993	0.42447
TraesCS2A01G519900	Inf	Inf
TraesCS2A01G520400	0.47685	0.76952
TraesCS2A01G523000	-1.1596	-0.99272
TraesCS2A01G523700	2.2183	1.9283
TraesCS2A01G535900	2.1028	2.125
TraesCS2A01G536200	3.396	3.1332
TraesCS2A01G547300	2.6552	2.3145
TraesCS2A01G552000	-1.1494	-1.1044
TraesCS2A01G553400	-0.91774	-1.0053
TraesCS2A01G554200	0.94091	0.80614
TraesCS2A01G554900	3.5831	3.3003
TraesCS2A01G560500	2.1882	2.2482
TraesCS2A01G560900	#NAME?	-4.6595
TraesCS2A01G561300	-1.6694	-1.2402
TraesCS2A01G562500	-0.53382	-0.7328
TraesCS2A01G564100	4.5705	4.2265
TraesCS2A01G568300	2.7792	3.8763
TraesCS2A01G571700	3.164	2.2553
TraesCS2A01G575400	0.85247	0.6369
TraesCS2A01G576600	-0.78838	-0.51901
TraesCS2A01G583600	1.2502	1.177
TraesCS2A01G586500	2.3323	2.0907
TraesCS2A01G587700	1.0009	0.63375
TraesCS2A01G590600	4.7695	3.142
TraesCS2B01G010300	-0.78346	-0.5676
TraesCS2B01G012000	2.0811	2.8002
TraesCS2B01G012800	0.70745	0.78207
TraesCS2B01G021800	-1.4275	-1.1855
TraesCS2B01G022800	-0.7426	-0.54362
TraesCS2B01G023800	-0.31955	-0.78357
TraesCS2B01G038200	-0.90417	-0.78138
TraesCS2B01G042600	1.1163	0.61308
TraesCS2B01G045200	-1.1932	-0.68767
TraesCS2B01G045400	-0.52589	-0.5909
TraesCS2B01G047300	4.7321	4.438
TraesCS2B01G047900	1.5762	1.991
TraesCS2B01G051700	2.3136	2.2081
TraesCS2B01G052600	1.491	1.0807
TraesCS2B01G067500	-2.14	-1.6972
TraesCS2B01G072400	2.6597	4.2351
TraesCS2B01G079900	0.7077	1.1998
TraesCS2B01G083000	1.6373	1.2865
TraesCS2B01G084800	7.373	8.1955
TraesCS2B01G090000	Inf	Inf
TraesCS2B01G091400	Inf	Inf
TraesCS2B01G091800	0.6307	0.6218
TraesCS2B01G095500	-1.0806	-0.89002
TraesCS2B01G096200	0.73186	0.64496
TraesCS2B01G101600	1.9564	1.4685
TraesCS2B01G101800	-2.6227	-2.5928
TraesCS2B01G110800	0.531	0.51953
TraesCS2B01G113200	-0.32124	-0.4445
TraesCS2B01G115200	Inf	Inf
TraesCS2B01G116900	1.8057	1.8834
TraesCS2B01G117700	-0.45254	-0.56627
TraesCS2B01G118300	-4.7207	-4.8279
TraesCS2B01G119100	1.8374	2.0699
TraesCS2B01G119300	1.7537	1.8537
TraesCS2B01G120200	1.5105	1.6373
TraesCS2B01G123000	3.5855	3.8369
TraesCS2B01G123100	-0.78883	-1.0454
TraesCS2B01G132400	3.652	4.6377
TraesCS2B01G133600	-2.8405	-1.252
TraesCS2B01G135900	-0.60363	-0.56048
TraesCS2B01G138200	2.0184	2.5777
TraesCS2B01G144900	3.2102	3.2635
TraesCS2B01G146200	1.2862	1.5849
TraesCS2B01G147000	0.83524	1.0705
TraesCS2B01G148700	-0.82756	-0.91361
TraesCS2B01G148800	-0.76086	-0.54229
TraesCS2B01G150900	3.2239	4.234
TraesCS2B01G153800	-0.74379	-0.73743
TraesCS2B01G158100	2.8621	3.6613
TraesCS2B01G159000	Inf	Inf
TraesCS2B01G165300	-1.124	-0.96248
TraesCS2B01G168300	4.6519	4.7884
TraesCS2B01G170400	0.61078	0.55709
TraesCS2B01G172700	1.316	1.3575
TraesCS2B01G175300	0.51449	0.68744
TraesCS2B01G180400	2.6479	2.9325
TraesCS2B01G181900	1.1137	0.91765
TraesCS2B01G182600	-0.73976	-0.73426
TraesCS2B01G183100	1.5886	1.6718
TraesCS2B01G183700	-0.98225	-0.90908
TraesCS2B01G186700	3.3402	3.4668
TraesCS2B01G187100	Inf	Inf
TraesCS2B01G187700	3.0497	3.0472
TraesCS2B01G188900	1.7993	1.9362
TraesCS2B01G191500	Inf	Inf
TraesCS2B01G192400	-0.71075	-0.72445
TraesCS2B01G192800	-0.38339	-0.46106
TraesCS2B01G194500	-0.62123	-0.63405
TraesCS2B01G200300	1.999	1.9334
TraesCS2B01G201100	1.4021	1.5402
TraesCS2B01G205600	3.4093	2.8682
TraesCS2B01G209100	-1.439	-1.2271
TraesCS2B01G210200	1.7564	1.8336
TraesCS2B01G210900	3.4442	3.3281
TraesCS2B01G212400	0.89443	1.8157
TraesCS2B01G212600	Inf	Inf
TraesCS2B01G212900	7.3026	6.8464
TraesCS2B01G215700	-0.58483	-0.52168
TraesCS2B01G217200	2.2566	2.2494
TraesCS2B01G217300	-0.77005	-0.87359
TraesCS2B01G217800	-0.7262	-0.45398
TraesCS2B01G219300	1.6492	2.0064
TraesCS2B01G220400	2.8447	2.4505
TraesCS2B01G222400	-1.2544	-0.96173
TraesCS2B01G223400	2.3349	1.5858
TraesCS2B01G226700	-0.66878	-0.79899
TraesCS2B01G227600	-0.54309	-0.56477
TraesCS2B01G228200	1.9199	2.3351
TraesCS2B01G228300	2.888	3.2705
TraesCS2B01G229300	2.3785	2.5756
TraesCS2B01G229900	-1.0384	-0.84873
TraesCS2B01G230800	2.4775	1.7117
TraesCS2B01G233200	0.54032	0.75879
TraesCS2B01G234400	1.1832	1.508
TraesCS2B01G236000	-0.74538	-0.48447
TraesCS2B01G236700	0.83699	0.79419
TraesCS2B01G237000	4.0491	3.712
TraesCS2B01G238900	0.35995	0.39663
TraesCS2B01G239400	-1.1413	-1.1463
TraesCS2B01G240200	3.5806	3.4246
TraesCS2B01G241200	1.0901	0.64478
TraesCS2B01G242300	Inf	Inf
TraesCS2B01G243500	1.4277	1.6094
TraesCS2B01G245200	-1.2183	-0.95444
TraesCS2B01G248600	-0.65558	-0.41526
TraesCS2B01G248700	-0.50539	-0.543
TraesCS2B01G248900	1.7514	2.0429
TraesCS2B01G249200	0.83066	0.96139
TraesCS2B01G249500	-0.88978	-0.83951
TraesCS2B01G251800	-0.95952	-0.54061
TraesCS2B01G251900	-0.56365	-0.58004
TraesCS2B01G252200	-0.44595	-0.39487
TraesCS2B01G253500	-0.67504	-0.72105
TraesCS2B01G254000	-0.33971	-0.43904
TraesCS2B01G256600	-0.63327	-0.55489
TraesCS2B01G257000	-1.2924	-0.94224
TraesCS2B01G259400	-0.98368	-0.69906
TraesCS2B01G259800	1.8786	1.9092
TraesCS2B01G260100	-1.0404	-0.93685
TraesCS2B01G260900	-0.47676	-0.62236
TraesCS2B01G262900	-0.78572	-0.65889
TraesCS2B01G263900	-1.7936	-1.1548
TraesCS2B01G266200	-0.35202	-0.45899
TraesCS2B01G269300	1.3837	2.2467
TraesCS2B01G269400	-0.74782	-0.8407
TraesCS2B01G270000	-1.0019	-0.94315
TraesCS2B01G271200	-1.1877	-1.3875
TraesCS2B01G278500	1.8547	2.4305
TraesCS2B01G278700	-0.47666	-0.65577
TraesCS2B01G279000	-0.4117	-0.41263
TraesCS2B01G280200	-0.47849	-0.57032
TraesCS2B01G280500	1.8628	2.7899
TraesCS2B01G281800	-0.47908	-0.53023
TraesCS2B01G282500	-0.87316	-0.98646
TraesCS2B01G287200	-1.7823	-1.0334
TraesCS2B01G287900	-0.85193	-0.59383
TraesCS2B01G289300	1.6731	1.5804
TraesCS2B01G289900	-2.6535	-1.8199
TraesCS2B01G294500	1.9408	0.72668
TraesCS2B01G296900	-0.63676	-0.48058
TraesCS2B01G298400	0.83682	0.51928
TraesCS2B01G298800	1.0185	0.63007
TraesCS2B01G299300	-0.74837	-0.54197
TraesCS2B01G299900	4.4747	4.5922
TraesCS2B01G301100	-0.4309	-0.68234
TraesCS2B01G304200	-0.59918	-0.56572
TraesCS2B01G305800	-0.53207	-0.48628
TraesCS2B01G306400	-0.63134	-0.55972
TraesCS2B01G306500	0.61857	0.80811
TraesCS2B01G308700	2.4818	2.8042
TraesCS2B01G309100	-0.36207	-0.52618
TraesCS2B01G310000	-0.81293	-0.32702
TraesCS2B01G310300	0.51765	0.43442
TraesCS2B01G312200	2.1664	2.7858
TraesCS2B01G315600	1.6208	1.2131
TraesCS2B01G321000	-0.48475	-0.53623
TraesCS2B01G321300	-0.64789	-1.0565
TraesCS2B01G321400	Inf	Inf
TraesCS2B01G323500	-3.6011	-2.1534
TraesCS2B01G324800	-0.47806	-0.48717
TraesCS2B01G325200	-0.53911	-0.50094
TraesCS2B01G329100	-0.70311	-0.57429
TraesCS2B01G335700	0.59358	0.50785
TraesCS2B01G336300	5.2044	4.1191
TraesCS2B01G337800	-0.79919	-0.84561
TraesCS2B01G340400	-0.95587	-0.75291
TraesCS2B01G342300	-2.9942	-1.946
TraesCS2B01G344700	1.7556	1.1167
TraesCS2B01G344800	2.111	1.71
TraesCS2B01G344900	2.032	1.7413
TraesCS2B01G345700	-0.86628	-0.6862
TraesCS2B01G351400	-0.38207	-0.37179
TraesCS2B01G356800	-0.98406	-0.89305
TraesCS2B01G356900	-1.2326	-1.0578
TraesCS2B01G358700	Inf	Inf
TraesCS2B01G360900	-1.5585	-1.5716
TraesCS2B01G362600	-0.59735	-0.60405
TraesCS2B01G365900	1.9584	1.324
TraesCS2B01G370900	-3.267	-2.0411
TraesCS2B01G371100	-0.81456	-0.60831
TraesCS2B01G371700	1.4119	1.5389
TraesCS2B01G376700	-1.0647	-0.7745
TraesCS2B01G380000	1.5583	1.9332
TraesCS2B01G388800	1.2792	0.6471
TraesCS2B01G391400	Inf	Inf
TraesCS2B01G394200	-1.53	-1.0861
TraesCS2B01G395100	1.4297	1.3416
TraesCS2B01G396500	1.6169	1.8142
TraesCS2B01G397000	0.80344	1.3472
TraesCS2B01G397200	-0.89644	-0.95455
TraesCS2B01G397300	0.92419	1.1547
TraesCS2B01G401800	1.6895	1.3044
TraesCS2B01G406400	1.9442	1.9461
TraesCS2B01G406500	-0.80614	-0.8091
TraesCS2B01G407800	4.63	5.512
TraesCS2B01G410200	-1.8998	-0.96117
TraesCS2B01G411500	4.0306	4.1843
TraesCS2B01G413800	1.6328	2.3369
TraesCS2B01G417300	2.3979	2.5168
TraesCS2B01G417400	-1.1945	-1.6629
TraesCS2B01G418100	1.3994	1.8999
TraesCS2B01G419800	2.4937	2.1176
TraesCS2B01G420100	-1.2006	-1.2843
TraesCS2B01G422400	-2.1318	-2.7247
TraesCS2B01G423700	2.7196	2.086
TraesCS2B01G423900	#NAME?	-3.6638
TraesCS2B01G424900	-1.4203	-2.2243
TraesCS2B01G426200	-1.1747	-0.99829
TraesCS2B01G428700	2.6521	2.4821
TraesCS2B01G428800	2.5765	2.3855
TraesCS2B01G428900	5.4313	5.1494
TraesCS2B01G431200	0.92076	1.0733
TraesCS2B01G431800	3.5218	2.9978
TraesCS2B01G434600	-1.1504	-0.54175
TraesCS2B01G435700	-0.69247	-0.71845
TraesCS2B01G439800	2.7925	3.2818
TraesCS2B01G443300	0.63585	0.80252
TraesCS2B01G446200	1.8305	1.6655
TraesCS2B01G451700	-1.6997	-0.75678
TraesCS2B01G453800	Inf	Inf
TraesCS2B01G454300	1.6902	1.4251
TraesCS2B01G455600	2.1654	1.796
TraesCS2B01G455900	0.66449	0.92438
TraesCS2B01G456300	-1.1036	-0.75247
TraesCS2B01G458800	1.0192	1.0112
TraesCS2B01G462800	6.1174	5.7227
TraesCS2B01G464400	1.6011	0.65307
TraesCS2B01G465200	3.7511	2.9156
TraesCS2B01G467400	-0.35651	-0.49352
TraesCS2B01G472000	-0.77268	-0.95505
TraesCS2B01G472800	-0.4168	-0.37669
TraesCS2B01G474700	3.8766	2.6301
TraesCS2B01G477500	1.6074	2.1514
TraesCS2B01G480800	3.4673	3.4227
TraesCS2B01G483200	-0.6074	-0.57126
TraesCS2B01G483500	-1.8405	-1.8804
TraesCS2B01G484200	0.85898	0.69085
TraesCS2B01G484700	1.9774	1.3646
TraesCS2B01G491600	-0.79668	-0.70092
TraesCS2B01G494300	2.4541	1.6211
TraesCS2B01G497500	0.6154	0.66117
TraesCS2B01G503100	4.1364	3.9012
TraesCS2B01G503500	5.6167	4.8474
TraesCS2B01G516300	3.8574	4.4705
TraesCS2B01G518000	1.5602	1.1338
TraesCS2B01G518400	2.8148	2.7991
TraesCS2B01G520700	-0.39913	-1.4046
TraesCS2B01G521800	-3.2158	-1.6332
TraesCS2B01G525700	1.2169	1.6031
TraesCS2B01G526100	2.7689	2.4271
TraesCS2B01G527300	6.8385	6.8988
TraesCS2B01G527800	2.9214	2.3014
TraesCS2B01G528100	-0.62693	-0.64186
TraesCS2B01G529900	2.0849	3.0626
TraesCS2B01G530000	5.0904	4.7636
TraesCS2B01G530300	0.73686	0.65524
TraesCS2B01G531900	1.798	1.8977
TraesCS2B01G534400	4.3937	4.0534
TraesCS2B01G535200	0.88225	0.80644
TraesCS2B01G537700	1.1807	0.92407
TraesCS2B01G538800	4.7387	4.4497
TraesCS2B01G540300	3.5213	3.3909
TraesCS2B01G541400	4.2953	3.4499
TraesCS2B01G541500	2.9696	2.3249
TraesCS2B01G543900	1.4841	0.80331
TraesCS2B01G555200	0.76687	0.57054
TraesCS2B01G563000	2.7581	3.0291
TraesCS2B01G566000	3.6404	3.9157
TraesCS2B01G567600	0.6144	0.89209
TraesCS2B01G567700	6.3147	5.8627
TraesCS2B01G569600	-0.99113	-1.4279
TraesCS2B01G570100	1.1706	1.2588
TraesCS2B01G570700	-0.50257	-0.52977
TraesCS2B01G571300	-1.2281	-0.86804
TraesCS2B01G572500	0.7172	0.81159
TraesCS2B01G572700	1.5157	1.6809
TraesCS2B01G574200	0.72971	0.73243
TraesCS2B01G576100	0.80978	0.53258
TraesCS2B01G576300	-1.0466	-0.87061
TraesCS2B01G577100	0.91519	1.5117
TraesCS2B01G580900	#NAME?	#NAME?
TraesCS2B01G584300	1.4867	1.3221
TraesCS2B01G586100	5.5354	5.6726
TraesCS2B01G588600	0.51464	0.64695
TraesCS2B01G589100	2.9721	3.1971
TraesCS2B01G591300	0.44005	0.70899
TraesCS2B01G595600	0.95884	0.61154
TraesCS2B01G596600	-0.62011	-0.76262
TraesCS2B01G599300	0.61066	0.48853
TraesCS2B01G603600	1.7441	2.5353
TraesCS2B01G610200	-0.73876	-0.91785
TraesCS2B01G622500	1.5606	1.7361
TraesCS2B01G624800	-1.0566	-0.52286
TraesCS2B01G628500	2.6427	2.7222
TraesCS2B01G628600	0.86125	0.74383
TraesCS2D01G000600	-0.51416	-0.33001
TraesCS2D01G005100	-3.2764	-2.6384
TraesCS2D01G005500	#NAME?	-4.3253
TraesCS2D01G008300	1.1868	1.133
TraesCS2D01G009700	0.69958	0.87647
TraesCS2D01G010100	2.371	1.8459
TraesCS2D01G010600	#NAME?	#NAME?
TraesCS2D01G013400	-0.75374	-0.52778
TraesCS2D01G014900	0.60082	0.6858
TraesCS2D01G018000	-2.2032	-2.5225
TraesCS2D01G024900	#NAME?	-3.8259
TraesCS2D01G026300	2.3051	2.2032
TraesCS2D01G026600	-6.2464	-3.3839
TraesCS2D01G027600	0.97247	0.96645
TraesCS2D01G028700	-1.9927	-2.5495
TraesCS2D01G030900	2.9059	2.7509
TraesCS2D01G031600	Inf	Inf
TraesCS2D01G031900	-0.70366	-1.0101
TraesCS2D01G033000	0.5797	0.83955
TraesCS2D01G033300	1.97	2.01
TraesCS2D01G034000	1.711	1.8268
TraesCS2D01G035400	0.59115	0.56576
TraesCS2D01G038400	3.1791	2.5587
TraesCS2D01G043500	3.3416	2.9945
TraesCS2D01G052900	3.2895	3.7914
TraesCS2D01G055300	1.1959	1.0881
TraesCS2D01G057600	Inf	Inf
TraesCS2D01G057800	1.8118	1.595
TraesCS2D01G063100	0.56574	0.63499
TraesCS2D01G067900	3.7392	3.8302
TraesCS2D01G068600	1.8531	1.83
TraesCS2D01G069700	4.9381	4.9437
TraesCS2D01G070400	2.3153	2.6274
TraesCS2D01G075500	0.51494	0.71163
TraesCS2D01G076500	3.4553	3.402
TraesCS2D01G078400	-0.92103	-1.1894
TraesCS2D01G078500	-1.1508	-1.0641
TraesCS2D01G078700	2.3983	2.3599
TraesCS2D01G080000	0.81761	0.74669
TraesCS2D01G082200	-0.48919	-0.46272
TraesCS2D01G082700	3.7193	4.2699
TraesCS2D01G084200	1.711	2.1004
TraesCS2D01G084400	1.695	1.7797
TraesCS2D01G087500	5.0238	4.7867
TraesCS2D01G091300	1.7526	1.7251
TraesCS2D01G093100	0.99276	0.76226
TraesCS2D01G094800	Inf	Inf
TraesCS2D01G095800	2.4452	2.0128
TraesCS2D01G099400	1.8482	2.0172
TraesCS2D01G100600	-1.0577	-2.2147
TraesCS2D01G101400	0.99116	0.97181
TraesCS2D01G102500	1.1606	0.9032
TraesCS2D01G103500	Inf	Inf
TraesCS2D01G103800	0.99101	0.69458
TraesCS2D01G110100	0.694	0.51383
TraesCS2D01G115100	1.2852	1.1896
TraesCS2D01G118400	-0.9664	-0.79306
TraesCS2D01G119200	1.3062	1.7715
TraesCS2D01G123200	-0.49795	-0.47401
TraesCS2D01G127100	1.8612	1.84
TraesCS2D01G127200	2.0545	2.7514
TraesCS2D01G128900	1.3959	1.6746
TraesCS2D01G130700	4.0506	4.0344
TraesCS2D01G134100	2.4142	2.5264
TraesCS2D01G136200	3.5891	3.5984
TraesCS2D01G139100	1.1486	1.427
TraesCS2D01G146300	3.6849	3.8974
TraesCS2D01G161200	0.95531	1.1166
TraesCS2D01G161700	-0.57752	-0.59206
TraesCS2D01G167800	1.1149	1.3294
TraesCS2D01G168800	3.9306	3.8256
TraesCS2D01G169700	0.51075	0.47271
TraesCS2D01G170000	2.4049	2.2673
TraesCS2D01G170600	0.6019	0.57086
TraesCS2D01G173300	4.7821	3.7073
TraesCS2D01G174300	-0.74881	-0.73362
TraesCS2D01G174800	3.3357	2.9016
TraesCS2D01G175700	0.43636	0.37052
TraesCS2D01G175800	-0.37712	-0.5307
TraesCS2D01G178700	3.8465	4.2897
TraesCS2D01G179700	1.9299	2.1093
TraesCS2D01G180200	3.1717	3.1174
TraesCS2D01G184500	Inf	Inf
TraesCS2D01G188500	-0.64286	-0.57943
TraesCS2D01G190400	-1.4753	-1.197
TraesCS2D01G190500	-1.9737	-0.86406
TraesCS2D01G190600	1.167	0.80606
TraesCS2D01G191500	2.1065	2.2493
TraesCS2D01G192100	2.7024	2.8563
TraesCS2D01G195800	4.3294	4.6388
TraesCS2D01G197900	4.8845	4.5907
TraesCS2D01G201100	1.1703	1.0026
TraesCS2D01G203800	1.8629	1.3245
TraesCS2D01G205400	-0.76573	-0.69958
TraesCS2D01G206700	1.8446	1.5967
TraesCS2D01G207000	-0.73182	-0.49288
TraesCS2D01G208500	2.1544	3.1497
TraesCS2D01G208700	2.3347	2.8195
TraesCS2D01G210100	0.47647	0.48862
TraesCS2D01G210300	Inf	Inf
TraesCS2D01G211600	-0.65852	-0.54304
TraesCS2D01G211900	-0.90866	-0.87818
TraesCS2D01G212900	-0.91884	-0.77116
TraesCS2D01G213300	1.7248	2.3812
TraesCS2D01G214500	-1.7026	-1.6782
TraesCS2D01G217300	0.54119	0.68578
TraesCS2D01G221000	3.1312	3.1214
TraesCS2D01G221200	-0.49274	-0.50813
TraesCS2D01G224200	-3.3533	-2.9386
TraesCS2D01G224700	1.1048	0.84587
TraesCS2D01G224900	1.3751	1.5831
TraesCS2D01G225100	-0.49427	-0.41151
TraesCS2D01G225800	-0.4728	-0.45696
TraesCS2D01G227000	1.8902	1.6339
TraesCS2D01G233900	-1.0982	-0.70254
TraesCS2D01G234200	-0.44361	-0.41131
TraesCS2D01G236800	-0.5517	-0.49641
TraesCS2D01G238300	-0.35303	-0.44236
TraesCS2D01G238900	-0.77092	-0.813
TraesCS2D01G242500	-0.79268	-0.84418
TraesCS2D01G242600	-0.68501	-0.76365
TraesCS2D01G246400	1.1544	1.4853
TraesCS2D01G246600	-0.50457	-0.62606
TraesCS2D01G248100	-1.4299	-1.4343
TraesCS2D01G250700	-0.37059	-0.48594
TraesCS2D01G251300	1.8243	1.6445
TraesCS2D01G253500	-0.60652	-0.67814
TraesCS2D01G255500	-1.4912	-0.47249
TraesCS2D01G258500	-0.62431	-0.5011
TraesCS2D01G258700	-1.2099	-0.90054
TraesCS2D01G264300	-0.90389	-0.90094
TraesCS2D01G266100	0.61283	0.6882
TraesCS2D01G269500	-0.85264	-0.79634
TraesCS2D01G269600	1.958	1.4888
TraesCS2D01G270300	-3.0107	-1.369
TraesCS2D01G271500	-1.1698	-0.81623
TraesCS2D01G275300	1.5157	1.1066
TraesCS2D01G279000	0.70626	0.909
TraesCS2D01G280700	-1.8481	-1.0574
TraesCS2D01G281300	3.428	3.7631
TraesCS2D01G283000	-2.3893	-4.5412
TraesCS2D01G283100	-0.45205	-0.51585
TraesCS2D01G285800	-0.5622	-0.54014
TraesCS2D01G287200	-0.60997	-0.48407
TraesCS2D01G287400	-1.9009	-1.7112
TraesCS2D01G287900	0.76277	1.0806
TraesCS2D01G289100	-1.112	-0.79182
TraesCS2D01G289400	2.889	2.8287
TraesCS2D01G289500	-1.0175	-0.66443
TraesCS2D01G290500	-0.70449	-0.58776
TraesCS2D01G290900	0.90751	1.1122
TraesCS2D01G293800	-0.35304	-0.5075
TraesCS2D01G294700	-0.83653	-1.0155
TraesCS2D01G295000	-5.1523	-2.7736
TraesCS2D01G296200	1.9698	2.1324
TraesCS2D01G296500	-0.92898	-0.79276
TraesCS2D01G297400	2.9601	2.8946
TraesCS2D01G301800	1.8671	1.2435
TraesCS2D01G303200	-1.0095	-0.91432
TraesCS2D01G304100	0.62207	0.61072
TraesCS2D01G304400	2.7626	1.9357
TraesCS2D01G307500	-0.8158	-0.58176
TraesCS2D01G308600	-0.79885	-0.79013
TraesCS2D01G308700	-1.5816	-0.85289
TraesCS2D01G310600	-0.47982	-0.60734
TraesCS2D01G312100	-0.56498	-0.59072
TraesCS2D01G313500	-5.008	-4.6018
TraesCS2D01G315400	0.86976	0.68352
TraesCS2D01G315500	1.8624	1.987
TraesCS2D01G319600	0.91575	0.74298
TraesCS2D01G324700	-3.2629	-1.2885
TraesCS2D01G325800	1.9311	1.4385
TraesCS2D01G332100	-0.37354	-0.40594
TraesCS2D01G334800	2.6935	2.5606
TraesCS2D01G336400	4.3256	4.3746
TraesCS2D01G339500	4.1477	5.0647
TraesCS2D01G339600	1.0366	1.6874
TraesCS2D01G341400	-0.53803	-0.55158
TraesCS2D01G341900	-1.0161	-0.85533
TraesCS2D01G342700	-0.63865	-0.76672
TraesCS2D01G346600	1.5188	1.1968
TraesCS2D01G347200	-3.0531	-2.2852
TraesCS2D01G347800	-0.37386	-0.53935
TraesCS2D01G351500	-1.0611	-0.72531
TraesCS2D01G351600	1.886	1.8111
TraesCS2D01G351900	3.0949	3.4254
TraesCS2D01G355300	-0.61053	-0.54747
TraesCS2D01G359000	2.2271	1.4156
TraesCS2D01G359900	4.9828	4.8937
TraesCS2D01G361200	-0.79753	-0.9792
TraesCS2D01G364200	-1.095	-0.78077
TraesCS2D01G368400	1.3733	2.4915
TraesCS2D01G371000	0.4786	0.65582
TraesCS2D01G371200	0.81287	0.85933
TraesCS2D01G372300	-0.49421	-0.39363
TraesCS2D01G372600	1.1459	1.8518
TraesCS2D01G375100	-0.68727	-0.70115
TraesCS2D01G375200	-1.6577	-1.2459
TraesCS2D01G376600	1.0292	1.041
TraesCS2D01G379600	-1.4571	-1.3986
TraesCS2D01G381100	-1.4508	-1.9653
TraesCS2D01G381500	2.5705	2.5474
TraesCS2D01G386100	1.2838	1.2243
TraesCS2D01G386200	-0.66189	-0.49453
TraesCS2D01G387500	3.2588	4.6702
TraesCS2D01G387600	-1.088	-1.0131
TraesCS2D01G387800	-0.50255	-0.4052
TraesCS2D01G390000	-1.3976	-0.6928
TraesCS2D01G391600	2.7857	1.8792
TraesCS2D01G392400	2.2111	1.6818
TraesCS2D01G396900	-1.8957	-1.6369
TraesCS2D01G398400	-0.91714	-0.87118
TraesCS2D01G399100	3.0435	2.6111
TraesCS2D01G400700	2.0553	1.9093
TraesCS2D01G401000	-2.7593	-1.7056
TraesCS2D01G404100	-1.4384	-1.1793
TraesCS2D01G405000	-0.48124	-0.4693
TraesCS2D01G407600	2.5489	2.4565
TraesCS2D01G407800	-0.76362	-1.0138
TraesCS2D01G410800	#NAME?	-4.8977
TraesCS2D01G412000	0.80508	0.74551
TraesCS2D01G412400	2.6683	3.1077
TraesCS2D01G414600	2.9763	3.437
TraesCS2D01G420900	4.4094	3.4686
TraesCS2D01G421100	-0.83862	-0.67648
TraesCS2D01G422600	0.35856	0.51255
TraesCS2D01G423800	2.3271	1.8417
TraesCS2D01G423900	0.9398	1.222
TraesCS2D01G428000	5.8897	4.537
TraesCS2D01G429400	0.91202	0.90214
TraesCS2D01G431000	2.069	1.8587
TraesCS2D01G432300	2.6993	2.1551
TraesCS2D01G432600	1.1359	1.3156
TraesCS2D01G432900	-0.92732	-0.71297
TraesCS2D01G434700	-0.60117	-0.38238
TraesCS2D01G435900	1.631	1.2402
TraesCS2D01G437800	3.8749	3.6371
TraesCS2D01G438500	#NAME?	#NAME?
TraesCS2D01G439600	3.5445	3.1558
TraesCS2D01G440900	2.3025	2.2948
TraesCS2D01G443200	1.3843	1.7123
TraesCS2D01G446300	Inf	Inf
TraesCS2D01G450000	-0.84005	-0.78721
TraesCS2D01G451800	5.8172	5.4588
TraesCS2D01G455800	2.5453	3.1532
TraesCS2D01G461500	-0.69607	-0.60911
TraesCS2D01G464900	#NAME?	#NAME?
TraesCS2D01G467700	0.70009	0.88166
TraesCS2D01G477500	-0.69641	-0.58209
TraesCS2D01G478000	2.458	2.1322
TraesCS2D01G478400	5.8515	5.269
TraesCS2D01G489700	2.8181	1.8332
TraesCS2D01G491300	1.3408	1.831
TraesCS2D01G493600	1.8198	1.8189
TraesCS2D01G496100	-0.36961	-0.39555
TraesCS2D01G498000	6.4667	5.2177
TraesCS2D01G500400	-0.5147	-0.76251
TraesCS2D01G505300	0.54005	0.58989
TraesCS2D01G505600	1.818	1.378
TraesCS2D01G506800	1.6436	1.5867
TraesCS2D01G507600	1.2763	1.1694
TraesCS2D01G509700	2.3933	1.8662
TraesCS2D01G511900	5.1418	4.8057
TraesCS2D01G512700	1.9719	1.8855
TraesCS2D01G513800	2.8555	2.8971
TraesCS2D01G514500	5.5471	5.2561
TraesCS2D01G514600	3.4869	3.6219
TraesCS2D01G515000	3.0546	2.8641
TraesCS2D01G521300	5.2794	4.8913
TraesCS2D01G521600	0.62061	0.86816
TraesCS2D01G524900	-3.7718	-2.1406
TraesCS2D01G525800	1.7258	1.2347
TraesCS2D01G528200	1.3432	0.8044
TraesCS2D01G540100	-2.0296	-1.0675
TraesCS2D01G540300	-1.4016	-0.81603
TraesCS2D01G540500	-0.99477	-1.1766
TraesCS2D01G542700	1.123	0.96969
TraesCS2D01G545200	0.72063	0.64671
TraesCS2D01G548300	1.7243	1.2097
TraesCS2D01G551000	3.5811	3.1241
TraesCS2D01G551600	-1.0792	-0.71254
TraesCS2D01G553000	-0.40277	-0.49185
TraesCS2D01G557200	-2.0134	-1.9799
TraesCS2D01G558800	0.59291	0.39633
TraesCS2D01G560100	1.0239	1.0591
TraesCS2D01G563600	5.8591	5.1015
TraesCS2D01G563800	-1.9339	-1.6285
TraesCS2D01G564200	0.65568	0.7447
TraesCS2D01G565600	0.94592	0.7778
TraesCS2D01G569700	3.4696	2.4685
TraesCS2D01G569800	0.48595	0.63427
TraesCS2D01G573600	2.2053	2.4179
TraesCS2D01G578600	-0.46973	-0.58439
TraesCS2D01G579000	2.4816	2.5281
TraesCS2D01G581200	4.2756	4.2204
TraesCS2D01G583400	-2.4213	-1.1721
TraesCS2D01G586100	1.1789	0.93754
TraesCS2D01G587900	-1.3136	-1.0611
TraesCS2D01G599700	-0.98153	-0.55535
TraesCS2D01G600200	0.90854	0.94611
TraesCS3A01G002300	1.2354	0.94839
TraesCS3A01G007600	4.0258	3.6964
TraesCS3A01G011000	#NAME?	#NAME?
TraesCS3A01G013700	1.429	1.1706
TraesCS3A01G018200	3.1814	3.3969
TraesCS3A01G023200	0.35674	0.43329
TraesCS3A01G024200	3.1621	3.3143
TraesCS3A01G024300	1.4771	2.0519
TraesCS3A01G026400	Inf	Inf
TraesCS3A01G030700	1.5892	1.4343
TraesCS3A01G034800	1.0038	0.76035
TraesCS3A01G035100	1.327	1.6127
TraesCS3A01G035500	2.6737	2.5512
TraesCS3A01G036600	-1.1735	-1.0508
TraesCS3A01G041600	2.7451	2.4855
TraesCS3A01G042700	Inf	Inf
TraesCS3A01G045900	-1.1716	-1.2057
TraesCS3A01G047200	0.36532	0.4481
TraesCS3A01G048400	6.0394	5.3824
TraesCS3A01G049300	-0.78727	-0.95365
TraesCS3A01G053300	-0.86449	-0.59521
TraesCS3A01G055600	-0.43389	-0.50498
TraesCS3A01G070500	-1.2594	-1.3223
TraesCS3A01G071100	-1.2121	-1.0967
TraesCS3A01G072000	1.0326	0.74338
TraesCS3A01G073000	1.652	1.817
TraesCS3A01G082100	0.51981	0.49316
TraesCS3A01G084500	2.3036	2.3905
TraesCS3A01G092000	-2.8702	-2.0593
TraesCS3A01G094200	7.0801	6.2251
TraesCS3A01G095400	-1.4351	-0.96859
TraesCS3A01G095900	-3.3095	-2.4698
TraesCS3A01G097000	-0.32148	-0.47284
TraesCS3A01G098300	1.1798	1.4421
TraesCS3A01G098700	3.1827	3.101
TraesCS3A01G102000	2.6126	2.0169
TraesCS3A01G103500	3.5944	3.808
TraesCS3A01G104600	1.738	2.6465
TraesCS3A01G112600	-0.85162	-0.75079
TraesCS3A01G116700	-1.6208	-0.82842
TraesCS3A01G121000	Inf	Inf
TraesCS3A01G122000	3.8146	4.1716
TraesCS3A01G123300	2.7504	2.7953
TraesCS3A01G125300	-1.4912	-1.1698
TraesCS3A01G125500	2.2694	1.5917
TraesCS3A01G127100	1.7207	1.643
TraesCS3A01G129800	3.3354	2.4689
TraesCS3A01G130800	5.6099	5.4172
TraesCS3A01G131200	5.696	4.9528
TraesCS3A01G132400	-1.0026	-1.1302
TraesCS3A01G134600	1.4599	0.97486
TraesCS3A01G135100	1.2687	1.5083
TraesCS3A01G140000	1.6183	1.6122
TraesCS3A01G140200	1.4135	1.544
TraesCS3A01G142700	0.42495	0.67722
TraesCS3A01G143400	2.5293	2.6008
TraesCS3A01G146800	0.91378	1.4773
TraesCS3A01G147100	Inf	Inf
TraesCS3A01G150100	-1.4218	-2.0739
TraesCS3A01G150900	0.8451	0.86672
TraesCS3A01G151000	3.4401	4.3568
TraesCS3A01G151200	2.0873	2.2445
TraesCS3A01G152700	-1.585	-1.6215
TraesCS3A01G158000	-1.304	-0.83126
TraesCS3A01G159100	2.3472	2.8553
TraesCS3A01G160800	2.4776	2.7691
TraesCS3A01G163000	1.5034	1.903
TraesCS3A01G172900	-0.34027	-0.64368
TraesCS3A01G174500	-0.4539	-0.37304
TraesCS3A01G179500	1.1718	1.2913
TraesCS3A01G181800	-0.6997	-0.66457
TraesCS3A01G183100	1.5531	1.2958
TraesCS3A01G184200	-1.0401	-0.71309
TraesCS3A01G184500	-0.63563	-0.48925
TraesCS3A01G184900	-0.83786	-1.1627
TraesCS3A01G186600	-0.63996	-0.55732
TraesCS3A01G189300	-0.4205	-0.34806
TraesCS3A01G189800	-1.0732	-0.80405
TraesCS3A01G191900	-0.59924	-0.49686
TraesCS3A01G192900	-0.33772	-0.43974
TraesCS3A01G193700	-0.70338	-0.68742
TraesCS3A01G195200	0.63668	0.48991
TraesCS3A01G195500	-1.4238	-2.0326
TraesCS3A01G200600	2.4061	2.3655
TraesCS3A01G200800	-0.82181	-0.61982
TraesCS3A01G200900	-0.49687	-0.63229
TraesCS3A01G201600	-0.84182	-0.71149
TraesCS3A01G203300	-0.42244	-0.41788
TraesCS3A01G204900	-0.49663	-0.56565
TraesCS3A01G205000	2.7049	2.8053
TraesCS3A01G205300	-0.57751	-0.61703
TraesCS3A01G207100	-0.78228	-0.96166
TraesCS3A01G207500	-0.82134	-0.69284
TraesCS3A01G208800	1.0213	1.269
TraesCS3A01G209900	-0.9375	-1.0965
TraesCS3A01G210200	-0.8051	-0.94626
TraesCS3A01G214300	0.56104	0.90011
TraesCS3A01G215900	2.0568	2.2251
TraesCS3A01G216700	1.4687	1.2922
TraesCS3A01G217300	-1.2187	-1.0427
TraesCS3A01G218100	-0.63903	-0.46691
TraesCS3A01G219200	-4.0466	-1.1023
TraesCS3A01G220800	0.77625	0.58721
TraesCS3A01G222400	1.2234	0.86055
TraesCS3A01G223000	1.6588	1.2533
TraesCS3A01G224100	-2.4846	-3.1476
TraesCS3A01G226200	-1.541	-1.2197
TraesCS3A01G231900	-0.8827	-0.74678
TraesCS3A01G233100	2.389	1.6761
TraesCS3A01G234600	-2.9843	-1.8825
TraesCS3A01G235500	2.772	3.3499
TraesCS3A01G236100	-3.1051	-1.5687
TraesCS3A01G237800	4.22	4.0523
TraesCS3A01G239000	2.3861	2.0328
TraesCS3A01G239400	0.91337	0.76005
TraesCS3A01G239700	1.8636	1.9757
TraesCS3A01G240000	-1.1596	-0.88064
TraesCS3A01G242000	-0.88374	-0.82502
TraesCS3A01G242500	1.2162	0.83192
TraesCS3A01G243900	0.66177	1.0146
TraesCS3A01G245400	0.99832	1.1329
TraesCS3A01G246100	Inf	Inf
TraesCS3A01G250400	0.60232	0.5284
TraesCS3A01G250500	-0.76257	-0.71509
TraesCS3A01G251900	0.555	0.57067
TraesCS3A01G253800	3.0528	3.3456
TraesCS3A01G255100	-2.416	-1.05
TraesCS3A01G258600	-0.8123	-0.48503
TraesCS3A01G258900	1.3565	1.6312
TraesCS3A01G259900	1.2776	0.64361
TraesCS3A01G261300	-0.60551	-0.52965
TraesCS3A01G263500	-0.55629	-0.71998
TraesCS3A01G264100	0.44684	0.66844
TraesCS3A01G268100	3.2486	3.316
TraesCS3A01G268400	2.564	2.387
TraesCS3A01G268700	-0.46896	-1.1485
TraesCS3A01G270900	5.6484	5.3888
TraesCS3A01G271400	3.0447	2.0258
TraesCS3A01G273600	0.91378	0.89268
TraesCS3A01G275000	-0.63845	-0.66837
TraesCS3A01G275300	4.5349	3.9724
TraesCS3A01G275800	1.5326	1.9693
TraesCS3A01G277100	3.5501	2.8045
TraesCS3A01G279500	-1.2526	-0.74376
TraesCS3A01G280200	-1.8709	-0.97207
TraesCS3A01G282200	1.2027	1.0321
TraesCS3A01G283700	1.7244	2.1118
TraesCS3A01G283800	0.88129	0.82164
TraesCS3A01G284100	Inf	Inf
TraesCS3A01G285800	8.2331	7.7168
TraesCS3A01G287100	1.8842	2.8138
TraesCS3A01G287500	2.3496	2.2005
TraesCS3A01G290200	-0.87082	-0.84082
TraesCS3A01G291000	0.96854	0.77694
TraesCS3A01G291100	0.84321	0.64473
TraesCS3A01G291400	6.105	5.5542
TraesCS3A01G291900	-0.6895	-0.4633
TraesCS3A01G292200	-1.0028	-0.75573
TraesCS3A01G293400	5.0507	3.6529
TraesCS3A01G293500	1.9124	0.90545
TraesCS3A01G294000	-0.6225	-0.80907
TraesCS3A01G294700	-1.4388	-0.96599
TraesCS3A01G296300	3.7829	3.2875
TraesCS3A01G296400	Inf	Inf
TraesCS3A01G298300	-0.85893	-0.56802
TraesCS3A01G298600	-1.6777	-1.5461
TraesCS3A01G301800	0.69096	0.45783
TraesCS3A01G302700	-0.92908	-0.83391
TraesCS3A01G302800	1.8913	1.9629
TraesCS3A01G303300	1.3448	1.3004
TraesCS3A01G305400	-1.5169	-1.0755
TraesCS3A01G307500	0.88537	1.4985
TraesCS3A01G312800	0.89501	1.0578
TraesCS3A01G313700	2.7759	2.8916
TraesCS3A01G315500	-0.70899	-0.51846
TraesCS3A01G317000	1.287	1.2611
TraesCS3A01G320100	-0.74194	-0.93964
TraesCS3A01G320500	-1.8078	-1.3065
TraesCS3A01G321400	-1.4083	-1.3801
TraesCS3A01G323000	-0.34751	-0.43551
TraesCS3A01G323700	1.3534	1.6432
TraesCS3A01G324600	4.0751	3.3922
TraesCS3A01G326200	-0.63514	-0.50186
TraesCS3A01G327200	-1.0181	-0.9799
TraesCS3A01G329300	0.53704	0.58306
TraesCS3A01G330800	Inf	Inf
TraesCS3A01G331800	5.0295	5.0896
TraesCS3A01G334400	2.1639	2.0823
TraesCS3A01G340700	3.15	2.9686
TraesCS3A01G342100	0.98648	0.72142
TraesCS3A01G345800	1.235	0.7914
TraesCS3A01G347400	-2.8869	-2.0257
TraesCS3A01G348100	1.1074	1.0107
TraesCS3A01G352500	-0.5281	-0.44466
TraesCS3A01G354600	-0.48154	-0.39066
TraesCS3A01G355800	-2.9988	-2.6946
TraesCS3A01G356200	Inf	Inf
TraesCS3A01G356800	1.561	1.4726
TraesCS3A01G360500	3.5825	4.2333
TraesCS3A01G361400	-0.72409	-0.94181
TraesCS3A01G362200	0.99872	1.1669
TraesCS3A01G363900	1.139	1.8424
TraesCS3A01G366000	2.1399	2.4588
TraesCS3A01G368400	3.3673	3.2665
TraesCS3A01G368600	6.2831	5.1956
TraesCS3A01G369900	1.9825	2.1914
TraesCS3A01G371200	2.746	3.3786
TraesCS3A01G371300	0.56318	0.5286
TraesCS3A01G374200	3.2336	3.6522
TraesCS3A01G375400	1.1599	0.80567
TraesCS3A01G375800	-1.1202	-1.078
TraesCS3A01G376900	Inf	Inf
TraesCS3A01G381100	-1.9507	-1.4695
TraesCS3A01G381200	-0.79108	-0.66034
TraesCS3A01G387600	1.4049	1.4088
TraesCS3A01G387700	Inf	Inf
TraesCS3A01G390900	0.4723	0.40729
TraesCS3A01G391200	1.0842	1.0145
TraesCS3A01G394200	1.998	1.8361
TraesCS3A01G395000	1.9664	1.8944
TraesCS3A01G395900	-0.50991	-0.65825
TraesCS3A01G397700	3.7908	3.3721
TraesCS3A01G399200	0.55177	0.82426
TraesCS3A01G400400	-1.1894	-0.84312
TraesCS3A01G403300	2.5317	2.55
TraesCS3A01G403500	2.3065	2.2239
TraesCS3A01G404500	0.86237	1.2834
TraesCS3A01G405600	1.2578	1.7183
TraesCS3A01G405700	-1.9734	-2.6147
TraesCS3A01G406900	3.405	2.4862
TraesCS3A01G407100	1.8614	1.791
TraesCS3A01G410600	-0.97061	-0.60924
TraesCS3A01G411700	#NAME?	-1.736
TraesCS3A01G413900	2.4169	2.1399
TraesCS3A01G414000	-0.60865	-0.6501
TraesCS3A01G414100	-0.41255	-0.53398
TraesCS3A01G414500	Inf	Inf
TraesCS3A01G422200	1.5201	2.1531
TraesCS3A01G423200	0.37437	0.43515
TraesCS3A01G426500	1.5428	1.2875
TraesCS3A01G433300	-1.0695	-0.75706
TraesCS3A01G437800	2.8797	2.1401
TraesCS3A01G438100	0.90543	1.2675
TraesCS3A01G441000	3.018	2.9654
TraesCS3A01G446500	1.8124	1.7533
TraesCS3A01G449000	2.8664	2.2742
TraesCS3A01G452800	3.2218	3.1167
TraesCS3A01G452900	0.91367	0.81682
TraesCS3A01G455800	2.7688	3.8701
TraesCS3A01G460300	1.361	1.0445
TraesCS3A01G463100	1.6028	1.7954
TraesCS3A01G463700	1.5587	1.1132
TraesCS3A01G467300	-0.49582	-0.50314
TraesCS3A01G480200	2.9124	2.4186
TraesCS3A01G480900	-1.6059	-1.4538
TraesCS3A01G489800	3.1094	2.8597
TraesCS3A01G490900	1.0411	0.96366
TraesCS3A01G491500	3.0399	2.3777
TraesCS3A01G495400	2.7864	2.8004
TraesCS3A01G503600	0.78816	0.58105
TraesCS3A01G507400	1.4554	1.9111
TraesCS3A01G509700	4.732	4.4865
TraesCS3A01G512500	-0.62952	-0.66394
TraesCS3A01G512600	-0.66987	-0.90085
TraesCS3A01G512700	0.6355	0.4218
TraesCS3A01G513000	1.1048	1.9585
TraesCS3A01G516500	2.3748	2.5673
TraesCS3A01G528600	1.3921	1.0039
TraesCS3A01G532700	1.4785	1.7347
TraesCS3A01G537700	2.1805	2.2287
TraesCS3A01G538100	0.81871	0.80832
TraesCS3A01G538200	-0.74088	-0.63558
TraesCS3B01G002300	-1.6779	-1.1766
TraesCS3B01G005000	-0.97976	-0.9771
TraesCS3B01G006400	2.5079	2.4425
TraesCS3B01G006800	7.199	7.2593
TraesCS3B01G020200	2.554	2.2344
TraesCS3B01G020500	2.7148	2.9076
TraesCS3B01G020700	3.7939	3.512
TraesCS3B01G022100	Inf	Inf
TraesCS3B01G022200	Inf	Inf
TraesCS3B01G024200	Inf	Inf
TraesCS3B01G027700	1.2538	1.4123
TraesCS3B01G030500	1.1887	1.9321
TraesCS3B01G030600	0.76048	1.0951
TraesCS3B01G035200	2.0376	2.395
TraesCS3B01G039900	0.48867	0.36327
TraesCS3B01G042000	1.7403	1.5024
TraesCS3B01G042400	1.2458	0.82621
TraesCS3B01G042600	0.96175	0.65872
TraesCS3B01G044600	-1.9185	-1.9444
TraesCS3B01G045900	1.2095	1.0394
TraesCS3B01G047300	-1.2342	-1.1125
TraesCS3B01G048800	2.277	1.9109
TraesCS3B01G049200	3.4145	3.6469
TraesCS3B01G050300	4.3032	3.6703
TraesCS3B01G050500	1.4184	1.8086
TraesCS3B01G055700	-1.1764	-0.83905
TraesCS3B01G057000	1.8367	1.0628
TraesCS3B01G064500	-1.1259	-0.61044
TraesCS3B01G064900	0.48322	0.99965
TraesCS3B01G068100	3.7601	3.072
TraesCS3B01G089300	0.747	0.85714
TraesCS3B01G091200	0.4693	0.47934
TraesCS3B01G093100	0.35152	0.79249
TraesCS3B01G094500	4.7017	4.9248
TraesCS3B01G094800	Inf	Inf
TraesCS3B01G095900	2.5819	2.6278
TraesCS3B01G097000	-0.52095	-0.6698
TraesCS3B01G097200	0.89095	0.77184
TraesCS3B01G098000	1.2176	1.6118
TraesCS3B01G098500	1.1894	0.84646
TraesCS3B01G098600	2.6762	2.5232
TraesCS3B01G100700	-0.68826	-0.47311
TraesCS3B01G103300	5.7429	5.4607
TraesCS3B01G106900	5.6774	5.5516
TraesCS3B01G107200	-1.371	-1.2009
TraesCS3B01G109000	-0.69066	-0.57611
TraesCS3B01G119700	3.1267	2.7219
TraesCS3B01G123200	3.3163	2.625
TraesCS3B01G125600	3.0856	2.8326
TraesCS3B01G126900	#NAME?	#NAME?
TraesCS3B01G128500	-1.9481	-1.0514
TraesCS3B01G129000	-0.40882	-0.56333
TraesCS3B01G131500	-0.77889	-0.65938
TraesCS3B01G132900	1.8974	1.9812
TraesCS3B01G133200	-0.59601	-0.77326
TraesCS3B01G134000	-0.82312	-0.75237
TraesCS3B01G136000	2.8565	2.7221
TraesCS3B01G136200	Inf	Inf
TraesCS3B01G138900	3.2628	3.1872
TraesCS3B01G139500	5.3723	4.0008
TraesCS3B01G140300	Inf	Inf
TraesCS3B01G141200	3.3162	3.3519
TraesCS3B01G145100	-0.86364	-0.85067
TraesCS3B01G145200	3.1941	2.8757
TraesCS3B01G148300	-0.84436	-0.64298
TraesCS3B01G148400	0.67034	1.1157
TraesCS3B01G154500	3.3445	3.2965
TraesCS3B01G158200	2.6694	3.1903
TraesCS3B01G158500	1.5136	1.8275
TraesCS3B01G159200	-1.6309	-1.6608
TraesCS3B01G159300	-2.8115	-3.0501
TraesCS3B01G161700	2.0184	1.6207
TraesCS3B01G164300	1.4475	1.3134
TraesCS3B01G165800	0.816	1.0789
TraesCS3B01G166100	2.5235	1.9061
TraesCS3B01G169400	2.4691	2.945
TraesCS3B01G173500	-0.39427	-0.43402
TraesCS3B01G175000	1.3188	1.5187
TraesCS3B01G176500	2.4078	2.1293
TraesCS3B01G177600	1.435	1.5615
TraesCS3B01G177700	0.4877	0.47985
TraesCS3B01G179600	3.4663	3.3107
TraesCS3B01G181100	2.0961	1.6098
TraesCS3B01G182100	-0.64966	-0.52739
TraesCS3B01G185400	-0.69607	-0.60549
TraesCS3B01G191600	0.72494	0.88511
TraesCS3B01G194100	1.2456	1.7196
TraesCS3B01G197400	1.4828	1.1626
TraesCS3B01G197500	-0.58503	-0.4609
TraesCS3B01G199100	-2.7461	-1.2823
TraesCS3B01G200200	1.4835	1.8599
TraesCS3B01G212600	0.81696	0.61726
TraesCS3B01G214400	-0.66632	-0.67074
TraesCS3B01G216100	-0.78734	-0.61577
TraesCS3B01G217100	5.2155	5.2111
TraesCS3B01G218900	-0.67954	-0.69269
TraesCS3B01G219900	-0.50765	-0.39278
TraesCS3B01G220900	1.562	1.5555
TraesCS3B01G221500	-1.1378	-1.2585
TraesCS3B01G222900	0.67101	0.50887
TraesCS3B01G224800	-0.66334	-0.4431
TraesCS3B01G225600	-1.5542	-1.1127
TraesCS3B01G225800	-0.59301	-0.59058
[truncated: 3,331 more rows]

## Sheet: Table S3 DEG SS
Supplemental Table 3 A total of 3199 common significantly differentially expressed genes in both "CK_vs_S52" and "CK_vs_S66"
	CK_vs_S52	CK_vs_S66
Gene_id	Log2FoldChange	Log2FoldChange
TraesCS1A01G126900	-0.54484	-0.8787
TraesCS1A01G127900	0.53067	0.91517
TraesCS1A01G128300	0.79227	0.93488
TraesCS1A01G128600	-0.5966	-1.0364
TraesCS1A01G133500	-0.65513	-1.607
TraesCS1A01G136900	-0.8827	-1.0662
TraesCS1A01G139500	0.58614	0.81581
TraesCS1A01G141700	0.71926	1.2886
TraesCS1A01G143300	0.58883	-0.73394
TraesCS1A01G143900	-0.72756	-2.0696
TraesCS1A01G144800	-2.9372	-2.6716
TraesCS1A01G147500	0.70585	0.97927
TraesCS1A01G149700	1.837	1.8686
TraesCS1A01G152200	0.57037	0.9368
TraesCS1A01G153300	-0.52288	-0.5249
TraesCS1A01G153600	1.0457	1.1585
TraesCS1A01G153900	0.53048	0.85115
TraesCS1A01G156100	1.4225	1.7271
TraesCS1A01G156500	0.90553	1.4412
TraesCS1A01G158500	-0.96361	-1.757
TraesCS1A01G163400	-1.056	-2.6394
TraesCS1A01G164200	0.4316	0.46723
TraesCS1A01G166900	0.55345	0.70685
TraesCS1A01G169000	1.0324	1.7581
TraesCS1A01G173400	-0.37739	-1.4747
TraesCS1A01G173500	1.1071	1.5598
TraesCS1A01G177100	-3.8301	-1.4819
TraesCS1A01G182700	0.52937	0.59389
TraesCS1A01G184400	-1.699	-2.0067
TraesCS1A01G190500	0.9396	1.1502
TraesCS1A01G193300	0.51368	0.74262
TraesCS1A01G195700	1.8512	2.4252
TraesCS1A01G202000	#NAME?	-5.2377
TraesCS1A01G203000	0.41896	0.5433
TraesCS1A01G205800	0.58832	0.81908
TraesCS1A01G206700	0.7173	0.73754
TraesCS1A01G210300	-0.97511	-1.3783
TraesCS1A01G210600	0.72841	0.96905
TraesCS1A01G211000	-2.8797	-1.4887
TraesCS1A01G212800	0.56237	0.67145
TraesCS1A01G213000	-0.91502	-0.78218
TraesCS1A01G213400	0.4746	0.64354
TraesCS1A01G218900	0.4657	0.87632
TraesCS1A01G221900	0.63909	0.90943
TraesCS1A01G222800	-0.68502	-1.2292
TraesCS1A01G223700	0.678	1.0784
TraesCS1A01G230500	2.0159	2.7096
TraesCS1A01G234200	0.52083	0.46313
TraesCS1A01G234900	0.55131	0.61624
TraesCS1A01G236400	1.2585	1.2486
TraesCS1A01G236500	0.62785	1.6618
TraesCS1A01G241700	-2.563	-2.409
TraesCS1A01G244700	-0.6378	-1.4482
TraesCS1A01G245000	0.59473	0.59477
TraesCS1A01G248800	1.0386	1.5439
TraesCS1A01G257900	-0.85704	-0.82728
TraesCS1A01G264100	0.92466	1.2185
TraesCS1A01G267800	1.7414	2.6015
TraesCS1A01G268700	-2.0942	-3.0762
TraesCS1A01G269600	1.0329	1.0403
TraesCS1A01G277500	-0.67299	-1.1204
TraesCS1A01G279800	0.5573	0.74161
TraesCS1A01G280300	4.6899	4.0118
TraesCS1A01G283800	0.39188	0.4283
TraesCS1A01G286200	0.70575	1.0709
TraesCS1A01G288600	0.75904	0.81327
TraesCS1A01G289700	3.1166	2.7792
TraesCS1A01G289900	-1.552	-7.0849
TraesCS1A01G290200	1.2802	-3.6509
TraesCS1A01G298700	0.64747	0.82856
TraesCS1A01G302400	-1.3413	-1.4356
TraesCS1A01G306200	0.36298	0.48811
TraesCS1A01G307800	-1.2159	-1.0095
TraesCS1A01G308000	1.399	2.5832
TraesCS1A01G308100	0.9195	1.3437
TraesCS1A01G308200	6.9165	6.9075
TraesCS1A01G308500	-1.866	-2.3062
TraesCS1A01G310700	1.1129	0.95317
TraesCS1A01G325500	0.77582	1.2053
TraesCS1A01G334100	1.0592	1.5284
TraesCS1A01G338900	0.65748	0.63051
TraesCS1A01G347400	-1.9146	-1.599
TraesCS1A01G354000	1.2047	2.1869
TraesCS1A01G354700	-0.50926	-1.0969
TraesCS1A01G357300	1.3463	2.159
TraesCS1A01G357900	1.0466	0.40221
TraesCS1A01G360300	-0.82568	-0.9635
TraesCS1A01G362700	-1.3097	-2.074
TraesCS1A01G374200	-2.0244	-3.1696
TraesCS1A01G374800	0.90937	1.2655
TraesCS1A01G379300	-0.86756	-1.3729
TraesCS1A01G381800	-1.3015	-1.9785
TraesCS1A01G387700	0.97973	0.57559
TraesCS1A01G389500	0.44246	1.1786
TraesCS1A01G394900	1.5707	1.9765
TraesCS1A01G395600	0.39715	0.57484
TraesCS1A01G396200	-1.8452	-3.0213
TraesCS1A01G398300	1.5841	1.0342
TraesCS1A01G399600	0.82913	1.0715
TraesCS1A01G420500	0.48795	0.39449
TraesCS1A01G421500	Inf	Inf
TraesCS1A01G422400	0.95959	1.0458
TraesCS1A01G433400	-1.0819	-2.4412
TraesCS1A01G439500	0.94435	1.1523
TraesCS1A01G439600	-1.5199	-1.2614
TraesCS1A01G440200	0.55635	0.50484
TraesCS1A01G442400	0.60762	0.61387
TraesCS1B01G000600	-3.3723	-3.3852
TraesCS1B01G002000	0.61855	0.78841
TraesCS1B01G007600	2.9303	4.6845
TraesCS1B01G008200	0.65278	1.3768
TraesCS1B01G017800	-0.42483	-1.4506
TraesCS1B01G019100	0.7789	1.4557
TraesCS1B01G030000	0.91312	1.1684
TraesCS1B01G031100	-0.85905	-1.0662
TraesCS1B01G038700	-2.0849	#NAME?
TraesCS1B01G044200	1.2416	1.0397
TraesCS1B01G048300	1.0606	1.7284
TraesCS1B01G049900	1.6793	1.6834
TraesCS1B01G057800	0.52843	0.47046
TraesCS1B01G060100	0.59181	0.70971
TraesCS1B01G065700	-2.1754	-2.421
TraesCS1B01G065900	0.56332	0.59245
TraesCS1B01G072200	-1.1775	-1.1004
TraesCS1B01G077300	-2.0196	-5.2369
TraesCS1B01G081600	2.5132	2.1374
TraesCS1B01G084700	2.0551	1.7359
TraesCS1B01G085800	-0.73934	-1.2351
TraesCS1B01G086600	0.4589	0.45067
TraesCS1B01G088400	#NAME?	-2.3495
TraesCS1B01G093700	-2.0707	-3.0512
TraesCS1B01G094500	3.2601	3.615
TraesCS1B01G095200	0.55504	0.68017
TraesCS1B01G097700	0.79405	0.98961
TraesCS1B01G098600	0.78822	2.0893
TraesCS1B01G117600	6.0419	6.7016
TraesCS1B01G117900	0.51854	0.42696
TraesCS1B01G123100	0.78595	1.0619
TraesCS1B01G128100	0.85817	0.99514
TraesCS1B01G129600	0.6948	0.92561
TraesCS1B01G130300	1.0378	1.4778
TraesCS1B01G131300	0.61416	0.80247
TraesCS1B01G132800	1.1981	1.3141
TraesCS1B01G133100	-0.65963	-0.8533
TraesCS1B01G134900	-0.95097	-1.43
TraesCS1B01G138300	0.88652	1.5482
TraesCS1B01G144000	0.57798	0.65884
TraesCS1B01G145200	-1.2517	-1.185
TraesCS1B01G146100	-0.60097	-0.79316
TraesCS1B01G146900	1.0574	1.375
TraesCS1B01G147700	-0.87454	-0.88848
TraesCS1B01G152500	0.92666	1.1812
TraesCS1B01G158100	-2.1165	-1.8573
TraesCS1B01G165500	-1.0117	-2.7126
TraesCS1B01G165800	-0.7365	-1.0744
TraesCS1B01G169400	-1.0783	-1.1805
TraesCS1B01G171000	-1.9854	-3.0089
TraesCS1B01G171200	0.68816	0.87236
TraesCS1B01G171400	0.80128	1.4985
TraesCS1B01G175000	0.86364	1.0982
TraesCS1B01G177500	0.85599	1.2071
TraesCS1B01G181000	0.76242	0.82654
TraesCS1B01G184000	-2.1637	-1.2086
TraesCS1B01G187900	0.8811	1.5345
TraesCS1B01G188500	-1.7133	-1.5019
TraesCS1B01G190900	0.82097	1.4045
TraesCS1B01G191100	-0.51459	-0.89368
TraesCS1B01G196200	-1.216	-0.90692
TraesCS1B01G196500	-0.91557	-1.0388
TraesCS1B01G196700	0.76757	1.0701
TraesCS1B01G200000	0.42467	0.9047
TraesCS1B01G203500	1.3591	1.5347
TraesCS1B01G205800	1.9816	2.3261
TraesCS1B01G205900	0.43661	0.54339
TraesCS1B01G206100	-1.0955	-1.4285
TraesCS1B01G208100	0.46165	0.54836
TraesCS1B01G208500	-0.5188	-1.0806
TraesCS1B01G213800	1.1325	2.4574
TraesCS1B01G217000	0.49717	0.6126
TraesCS1B01G220300	0.59528	0.76039
TraesCS1B01G225000	-2.6315	-2.1151
TraesCS1B01G226300	0.54533	0.78296
TraesCS1B01G226800	0.85375	0.89346
TraesCS1B01G230300	-0.73785	-0.95016
TraesCS1B01G236600	0.80712	0.79551
TraesCS1B01G237000	0.6102	0.9723
TraesCS1B01G237300	-0.57781	-1.3735
TraesCS1B01G238600	0.53969	0.49538
TraesCS1B01G241100	1.1659	1.524
TraesCS1B01G242500	1.0392	1.435
TraesCS1B01G247700	1.1893	1.392
TraesCS1B01G249300	0.72771	0.72712
TraesCS1B01G251800	-2.0073	-2.3279
TraesCS1B01G251900	-1.3765	-1.4773
TraesCS1B01G256200	0.51916	0.44453
TraesCS1B01G259500	1.0792	1.3579
TraesCS1B01G268300	-0.74581	-0.6023
TraesCS1B01G268700	0.58814	0.5998
TraesCS1B01G269800	1.109	1.183
TraesCS1B01G272700	-1.6877	-1.7326
TraesCS1B01G274400	0.92077	1.3259
TraesCS1B01G274800	1.0054	1.5172
TraesCS1B01G278200	1.2074	1.5855
TraesCS1B01G278600	-2.6729	-1.4827
TraesCS1B01G279000	-3.1527	-2.3936
TraesCS1B01G283200	-0.91034	-1.0874
TraesCS1B01G287000	0.81655	0.90808
TraesCS1B01G288800	0.73038	0.51133
TraesCS1B01G290700	0.53244	0.85455
TraesCS1B01G293700	2.062	2.2369
TraesCS1B01G297000	0.82013	1.0445
TraesCS1B01G297700	-1.4892	-1.7039
TraesCS1B01G298400	1.276	1.6139
TraesCS1B01G308300	0.73578	1.1242
TraesCS1B01G308600	1.3047	1.7205
TraesCS1B01G317000	0.40672	0.35687
TraesCS1B01G318700	1.1158	1.5499
TraesCS1B01G335000	-1.3395	-1.4994
TraesCS1B01G342600	0.51853	0.74526
TraesCS1B01G350500	2.2517	3.5427
TraesCS1B01G352300	-1.537	-2.7359
TraesCS1B01G354200	1.122	1.4212
TraesCS1B01G357600	2.851	3.8208
TraesCS1B01G360500	-3.943	-2.1572
TraesCS1B01G362900	-1.4098	-2.1126
TraesCS1B01G367100	-0.54849	-0.91097
TraesCS1B01G368000	1.7832	2.5987
TraesCS1B01G378000	-2.0969	-2.3427
TraesCS1B01G379200	-0.85603	-1.6315
TraesCS1B01G379800	-1.3271	-1.0479
TraesCS1B01G382200	-1.6186	-1.9475
TraesCS1B01G382500	1.7502	1.441
TraesCS1B01G385000	3.8388	4.5134
TraesCS1B01G385100	4.3615	3.9456
TraesCS1B01G389600	0.94452	1.7437
TraesCS1B01G389900	Inf	Inf
TraesCS1B01G404200	-1.206	-1.1571
TraesCS1B01G409600	1.7035	2.318
TraesCS1B01G415400	-0.81452	-1.02
TraesCS1B01G423200	1.4807	2.3214
TraesCS1B01G424100	0.7582	0.97396
TraesCS1B01G424400	0.61754	0.72254
TraesCS1B01G425200	1.1909	1.1527
TraesCS1B01G438800	1.1112	1.7692
TraesCS1B01G443600	-3.9486	-5.3402
TraesCS1B01G447600	0.54154	0.81029
TraesCS1B01G454900	3.162	2.5271
TraesCS1B01G456400	5.2488	6.0315
TraesCS1B01G465700	-0.92944	-1.0176
TraesCS1B01G465800	-0.76721	-0.96739
TraesCS1B01G470800	-2.5253	-5.0276
TraesCS1B01G474800	0.89506	0.92587
TraesCS1B01G476500	0.54505	0.51282
TraesCS1D01G004900	0.62288	0.81486
TraesCS1D01G005400	0.4672	1.1148
TraesCS1D01G010500	-0.73347	-0.65617
TraesCS1D01G022900	1.3976	1.2723
TraesCS1D01G023300	-2.1483	-2.258
TraesCS1D01G026400	-1.063	-1.0981
TraesCS1D01G029900	-1.826	-1.5926
TraesCS1D01G030500	-2.3866	-2.532
TraesCS1D01G031700	1.5908	1.4798
TraesCS1D01G032700	#NAME?	#NAME?
TraesCS1D01G036800	-5.4555	-3.2355
TraesCS1D01G037900	-1.3526	-2.6805
TraesCS1D01G039500	1.0936	0.83238
TraesCS1D01G040100	-3.6614	-4.5853
TraesCS1D01G042100	-1.867	-2.4785
TraesCS1D01G045100	0.68735	0.72629
TraesCS1D01G046000	0.95228	0.51774
TraesCS1D01G046400	0.36324	0.57934
TraesCS1D01G051300	-1.3054	-2.0427
TraesCS1D01G051900	0.64047	0.85076
TraesCS1D01G055100	0.55274	0.79473
TraesCS1D01G066700	0.86781	1.2283
TraesCS1D01G074800	Inf	Inf
TraesCS1D01G079300	1.224	1.6263
TraesCS1D01G081400	1.0478	1.5397
TraesCS1D01G088300	0.65472	0.8655
TraesCS1D01G088700	-1.9999	-0.83964
TraesCS1D01G090600	1.0616	1.5269
TraesCS1D01G092400	Inf	Inf
TraesCS1D01G102600	-1.3742	-1.357
TraesCS1D01G103800	0.41568	0.85173
TraesCS1D01G106400	-2.3386	-1.7869
TraesCS1D01G109600	0.39107	0.65771
TraesCS1D01G109700	0.45802	0.62607
TraesCS1D01G111600	#NAME?	#NAME?
TraesCS1D01G114200	0.71748	1.1283
TraesCS1D01G115900	0.7658	1.0828
TraesCS1D01G120500	-2.224	-0.82766
TraesCS1D01G122500	0.67162	0.7787
TraesCS1D01G124400	-0.65023	-1.311
TraesCS1D01G124700	0.95396	1.378
TraesCS1D01G125600	-0.66769	-0.7021
TraesCS1D01G131500	0.52125	0.72647
TraesCS1D01G131800	-0.77402	-1.5229
TraesCS1D01G132200	0.55625	0.83308
TraesCS1D01G138200	-3.1686	#NAME?
TraesCS1D01G140600	-1.9415	-2.5977
TraesCS1D01G141700	-1.8491	-2.3521
TraesCS1D01G142100	0.57123	-0.89762
TraesCS1D01G145100	-0.69583	-1.3121
TraesCS1D01G146900	1.3017	1.541
TraesCS1D01G149100	0.59508	0.91155
TraesCS1D01G151800	-0.78082	-0.78516
TraesCS1D01G152000	0.77306	1.2424
TraesCS1D01G155800	-1.2129	-2.2398
TraesCS1D01G156200	0.76141	1.0166
TraesCS1D01G159600	0.51717	0.86528
TraesCS1D01G159900	3.4368	2.5733
TraesCS1D01G160000	-0.85081	-1.3698
TraesCS1D01G164600	-1.4834	-2.1235
TraesCS1D01G164800	0.43631	0.55788
TraesCS1D01G169200	-1.1532	-1.4426
TraesCS1D01G173700	-1.2025	-1.0959
TraesCS1D01G174000	0.68818	1.034
TraesCS1D01G176000	-6.3658	#NAME?
TraesCS1D01G176100	0.81775	1.2266
TraesCS1D01G185000	0.63835	0.66708
TraesCS1D01G187600	-1.2232	-1.2667
TraesCS1D01G188500	-1.6431	-1.464
TraesCS1D01G196400	1.1543	1.2169
TraesCS1D01G198600	0.71516	1.1896
TraesCS1D01G204200	0.64462	1.1166
TraesCS1D01G213900	0.44575	0.48893
TraesCS1D01G214300	-2.5305	-2.5309
TraesCS1D01G215700	0.41748	0.64808
TraesCS1D01G215800	-1.8794	-2.1215
TraesCS1D01G219000	-0.44722	-0.9607
TraesCS1D01G220900	#NAME?	#NAME?
TraesCS1D01G221400	0.66202	0.73184
TraesCS1D01G221700	0.80802	1.427
TraesCS1D01G223600	0.62407	0.59316
TraesCS1D01G223900	0.85955	1.1474
TraesCS1D01G224400	-0.53402	-1.5449
TraesCS1D01G228700	3.3926	3.1026
TraesCS1D01G231700	1.2877	2.1826
TraesCS1D01G239800	-2.1747	-1.713
TraesCS1D01G241100	3.1116	3.9625
TraesCS1D01G243500	-3.3156	-5.0005
TraesCS1D01G246200	0.41207	0.31067
TraesCS1D01G256800	-2.442	-2.4623
TraesCS1D01G257500	0.60973	0.44617
TraesCS1D01G264700	-1.7922	-2.6133
TraesCS1D01G266500	0.79838	1.293
TraesCS1D01G267400	1.2461	1.7451
TraesCS1D01G275800	0.36612	0.34354
TraesCS1D01G277900	-1.2998	-2.8399
TraesCS1D01G282400	0.76393	1.6388
TraesCS1D01G283800	-0.51638	-0.93453
TraesCS1D01G287300	-0.78896	-1.1228
TraesCS1D01G292600	0.84201	1.1763
TraesCS1D01G293200	1.0825	1.4574
TraesCS1D01G301300	0.7485	0.84703
TraesCS1D01G305900	0.32711	0.25238
TraesCS1D01G306300	Inf	Inf
TraesCS1D01G307400	2.3068	2.7877
TraesCS1D01G308200	1.8989	1.2329
TraesCS1D01G309200	-1.2337	-3.8946
TraesCS1D01G314900	0.74222	1.0859
TraesCS1D01G316800	3.3009	4.0401
TraesCS1D01G319400	-1.8172	-2.3323
TraesCS1D01G322000	-1.3651	-2.736
TraesCS1D01G322300	-1.3828	-1.1226
TraesCS1D01G323100	-1.0206	-1.4505
TraesCS1D01G323500	1.0596	1.5771
TraesCS1D01G327200	0.87041	1.0618
TraesCS1D01G327300	4.2692	4.4408
TraesCS1D01G331000	-1.2838	-1.715
TraesCS1D01G331300	0.52335	0.86043
TraesCS1D01G332600	-2.5158	-3.8807
TraesCS1D01G336400	0.49604	0.5459
TraesCS1D01G348400	1.2904	1.6613
TraesCS1D01G350400	-1.4979	-0.98889
TraesCS1D01G354900	0.61683	1.1206
TraesCS1D01G355800	-0.67114	-1.1456
TraesCS1D01G358400	0.82755	1.1048
TraesCS1D01G364000	2.2258	2.5983
TraesCS1D01G364800	0.65002	-0.55035
TraesCS1D01G365700	-1.2495	-1.4134
TraesCS1D01G367600	-0.8535	-1.4103
TraesCS1D01G368700	-0.68914	-1.1054
TraesCS1D01G372100	-1.883	-1.8914
TraesCS1D01G374500	#NAME?	#NAME?
TraesCS1D01G386500	-0.98019	-1.5999
TraesCS1D01G396400	-1.5662	-1.5826
TraesCS1D01G397600	0.78384	1.4053
TraesCS1D01G397700	-2.2336	-3.0253
TraesCS1D01G403100	1.6357	1.993
TraesCS1D01G403300	0.61586	0.88134
TraesCS1D01G407700	-2.5635	-2.6506
TraesCS1D01G413700	0.55227	0.61212
TraesCS1D01G418700	-3.0657	-2.6496
TraesCS1D01G421000	-1.7636	-2.1388
TraesCS1D01G421300	0.59467	0.63956
TraesCS1D01G424800	1.3395	1.2292
TraesCS1D01G434400	-0.72368	-1.2575
TraesCS1D01G435200	-1.6592	-2.7272
TraesCS1D01G437000	#NAME?	-3.0408
TraesCS1D01G442600	Inf	Inf
TraesCS1D01G443000	-1.0532	-2.1602
TraesCS1D01G444900	-1.3293	-1.7672
TraesCS1D01G446900	0.68984	0.8063
TraesCS1D01G450200	0.61832	0.8252
TraesCS1D01G451700	-0.81367	-1.3093
TraesCS1D01G453100	-0.76923	-0.94872
TraesCS1D01G454400	-0.46237	-1.1412
TraesCS2A01G002500	0.64082	0.84716
TraesCS2A01G005000	1.0018	0.85149
TraesCS2A01G010100	-0.42161	-1.0698
TraesCS2A01G022700	-1.1524	-1.3132
TraesCS2A01G026500	3.4888	4.1691
TraesCS2A01G029800	0.65674	0.8567
TraesCS2A01G030200	1.1374	1.5897
TraesCS2A01G032600	0.52633	0.68054
TraesCS2A01G033500	-1.2894	-1.7648
TraesCS2A01G052400	1.4661	1.7695
TraesCS2A01G064200	-1.5873	-1.8734
TraesCS2A01G064600	0.83097	0.82072
TraesCS2A01G064700	0.5768	0.70002
TraesCS2A01G065100	0.50822	0.639
TraesCS2A01G067000	-2.9935	-4.1851
TraesCS2A01G069500	0.50864	0.64579
TraesCS2A01G071100	-0.89071	-1.5139
TraesCS2A01G071600	#NAME?	#NAME?
TraesCS2A01G072500	0.53342	0.75349
TraesCS2A01G075000	#NAME?	#NAME?
TraesCS2A01G076300	-3.3022	-3.584
TraesCS2A01G087000	1.397	1.9075
TraesCS2A01G088000	0.84284	1.25
TraesCS2A01G091000	Inf	Inf
TraesCS2A01G101100	1.4484	1.6149
TraesCS2A01G102600	-0.66914	-0.83873
TraesCS2A01G109700	0.77211	0.81976
TraesCS2A01G111600	0.44993	0.42121
TraesCS2A01G112700	-1.0554	-1.7049
TraesCS2A01G113200	0.84071	1.2309
TraesCS2A01G113900	0.85799	1.3877
TraesCS2A01G117000	0.45434	0.45195
TraesCS2A01G117800	1.0189	1.167
TraesCS2A01G119400	-0.6794	-1.9302
TraesCS2A01G120900	1.48	2.0743
TraesCS2A01G122000	-0.90749	-1.6757
TraesCS2A01G124800	-1.8853	-1.5276
TraesCS2A01G125500	-0.70122	-1.9299
TraesCS2A01G126100	-0.88903	-0.92349
TraesCS2A01G128400	0.5644	0.69783
TraesCS2A01G128900	1.7534	2.3221
TraesCS2A01G136100	1.5162	1.7346
TraesCS2A01G138100	0.99214	1.1009
TraesCS2A01G141100	1.1804	1.368
TraesCS2A01G142500	1.1435	1.9261
TraesCS2A01G147500	0.72002	1.3135
TraesCS2A01G160200	0.73562	1.3462
TraesCS2A01G162600	-1.0113	-0.9899
TraesCS2A01G162900	-1.157	-1.4824
TraesCS2A01G170000	0.85767	1.1631
TraesCS2A01G172100	-1.0301	-1.5105
TraesCS2A01G177700	-1.6939	-1.5676
TraesCS2A01G182900	1.3141	1.3809
TraesCS2A01G185700	-0.4848	-0.70207
TraesCS2A01G187600	1.6183	2.4229
TraesCS2A01G188900	1.4142	2.2632
TraesCS2A01G192900	0.5529	0.76253
TraesCS2A01G197800	0.35907	0.51936
TraesCS2A01G199500	-3.238	-3.1232
TraesCS2A01G201600	-0.99113	-1.8203
TraesCS2A01G202900	0.55963	0.40283
TraesCS2A01G203600	0.70455	0.86219
TraesCS2A01G203700	-1.0338	-1.4953
TraesCS2A01G207000	-0.57873	-0.4872
TraesCS2A01G209100	0.35901	0.46107
TraesCS2A01G215100	-1.6128	-3.0041
TraesCS2A01G221200	-1.1105	-1.1726
TraesCS2A01G224200	0.6727	0.80012
TraesCS2A01G233500	-2.1518	-3.4542
TraesCS2A01G234500	1.2081	1.1477
TraesCS2A01G238900	0.47713	1.1821
TraesCS2A01G246000	-0.91194	-1.5644
TraesCS2A01G246100	0.91674	0.8624
TraesCS2A01G246200	-0.87056	-1.0568
TraesCS2A01G246800	0.54176	0.56555
TraesCS2A01G248300	0.5599	0.82332
TraesCS2A01G248400	1.1594	1.3222
TraesCS2A01G254100	-1.7987	-2.4182
TraesCS2A01G257000	0.54281	0.57391
TraesCS2A01G260400	0.51648	0.6892
TraesCS2A01G264800	-0.47584	-1.2979
TraesCS2A01G268300	-1.0078	-1.907
TraesCS2A01G268700	-0.73961	-1.3708
TraesCS2A01G270700	0.50021	0.82302
TraesCS2A01G272000	-1.4463	-1.244
TraesCS2A01G274000	-1.4387	-1.7845
TraesCS2A01G280400	0.54412	0.55678
TraesCS2A01G287700	-4.121	-4.5022
TraesCS2A01G290600	-1.7993	-2.2811
TraesCS2A01G294400	-0.93699	-2.085
TraesCS2A01G294500	-4.2057	-4.5825
TraesCS2A01G295600	-0.61243	-0.78096
TraesCS2A01G296000	-0.54093	-1.3293
TraesCS2A01G300100	0.82202	1.1387
TraesCS2A01G303500	0.57487	0.53646
TraesCS2A01G304100	0.63196	0.9269
TraesCS2A01G306700	#NAME?	-4.3399
TraesCS2A01G308200	0.80082	0.97484
TraesCS2A01G308800	0.76718	0.90952
TraesCS2A01G310500	1.2278	1.9868
TraesCS2A01G312600	-1.6603	-2.5277
TraesCS2A01G314800	-0.70453	-1.1229
TraesCS2A01G320300	1.4525	2.5779
TraesCS2A01G328600	-1.2787	-1.3986
TraesCS2A01G335800	3.693	4.8384
TraesCS2A01G339100	-2.8485	-7.1474
TraesCS2A01G340000	0.36166	0.36601
TraesCS2A01G342100	-3.0095	-2.4109
TraesCS2A01G342900	-2.0443	-1.8228
TraesCS2A01G346200	-1.7967	-2.8531
TraesCS2A01G347600	0.91889	1.7523
TraesCS2A01G353500	-1.3019	-1.4761
TraesCS2A01G356300	0.50903	0.57117
TraesCS2A01G359400	-1.4194	-2.3955
TraesCS2A01G373600	-3.2055	-2.9811
TraesCS2A01G376600	-1.2448	-1.3814
TraesCS2A01G377800	-1.0687	-1.7436
TraesCS2A01G378000	1.3811	1.3461
TraesCS2A01G384400	1.5181	1.3974
TraesCS2A01G388500	-4.2863	-3.8967
TraesCS2A01G391600	-1.9739	-2.13
TraesCS2A01G391700	0.76519	0.92677
TraesCS2A01G401500	0.88993	1.0532
TraesCS2A01G403800	-1.2544	-0.90123
TraesCS2A01G404900	0.6894	1.1754
TraesCS2A01G413700	-2.3639	-3.8145
TraesCS2A01G421400	1.0459	1.3116
TraesCS2A01G425000	-5.4667	-4.4005
TraesCS2A01G427000	0.99024	1.7381
TraesCS2A01G432800	3.0417	2.3362
TraesCS2A01G436800	0.70354	1.1502
TraesCS2A01G437900	1.2239	1.149
TraesCS2A01G446500	0.91027	0.86235
TraesCS2A01G447200	Inf	Inf
TraesCS2A01G455100	-0.85241	-0.74608
TraesCS2A01G457600	0.68648	0.7953
TraesCS2A01G459000	-1.4862	-1.6072
TraesCS2A01G459600	-0.7152	-1.4963
TraesCS2A01G460400	0.37973	0.66452
TraesCS2A01G468200	-2.6917	-2.4516
TraesCS2A01G472700	1.5434	1.6243
TraesCS2A01G473800	-1.8451	-3.5718
TraesCS2A01G478600	1.1697	1.2659
TraesCS2A01G497500	-2.9121	-2.6458
TraesCS2A01G501200	-1.3318	-2.0004
TraesCS2A01G503200	0.61802	0.73888
TraesCS2A01G507500	0.75251	1.4274
TraesCS2A01G508500	5.767	5.3712
TraesCS2A01G514400	0.5243	0.98958
TraesCS2A01G517900	-1.3742	-4.0894
TraesCS2A01G527600	0.51305	0.71345
TraesCS2A01G531500	-4.4272	#NAME?
TraesCS2A01G537900	1.5942	2.4701
TraesCS2A01G544700	-1.9493	-2.8309
TraesCS2A01G547900	1.0428	1.1654
TraesCS2A01G550000	Inf	Inf
TraesCS2A01G555400	1.1815	1.1018
TraesCS2A01G556200	0.78992	1.0625
TraesCS2A01G557900	-2.5627	-2.8325
TraesCS2A01G559500	-1.3531	-1.2722
TraesCS2A01G566000	#NAME?	#NAME?
TraesCS2A01G577000	1.1405	2.1798
TraesCS2A01G583700	1.6756	2.2778
TraesCS2A01G585800	#NAME?	-4.4283
TraesCS2A01G591700	-2.3464	-4.5223
TraesCS2B01G015500	0.73239	0.87525
TraesCS2B01G018500	-5.431	#NAME?
TraesCS2B01G030700	0.5453	0.7509
TraesCS2B01G031800	-1.0258	-1.2017
TraesCS2B01G041800	-1.368	-1.0073
TraesCS2B01G044700	0.7685	1.5187
TraesCS2B01G045700	1.0279	1.3445
TraesCS2B01G047400	3.3286	3.0522
TraesCS2B01G048400	-3.0525	-3.5606
TraesCS2B01G053700	0.80246	1.0387
TraesCS2B01G058000	-1.0591	-2.2332
TraesCS2B01G076800	0.79769	0.94049
TraesCS2B01G076900	0.91286	0.88527
TraesCS2B01G077300	0.56417	0.62583
TraesCS2B01G080400	1.3896	1.6147
TraesCS2B01G082700	0.56964	0.65003
TraesCS2B01G086200	-4.544	-1.9389
TraesCS2B01G087800	Inf	Inf
TraesCS2B01G096600	-0.88912	-0.83614
TraesCS2B01G100300	0.99232	2.1566
TraesCS2B01G102500	0.57017	1.0393
TraesCS2B01G108000	-1.1067	-1.3389
TraesCS2B01G113400	#NAME?	#NAME?
TraesCS2B01G115700	4.2642	4.7154
TraesCS2B01G119700	-0.69569	-0.85353
TraesCS2B01G123400	2.21	2.7255
TraesCS2B01G127700	0.96076	1.1931
TraesCS2B01G139100	-1.7019	-1.9059
TraesCS2B01G139600	Inf	Inf
TraesCS2B01G141900	0.99271	1.5454
TraesCS2B01G144300	0.66199	1.2166
TraesCS2B01G145800	-1.905	-4.8813
TraesCS2B01G147700	-0.57323	-1.0356
TraesCS2B01G148000	-1.0863	-1.9529
TraesCS2B01G148600	0.79144	1.2132
TraesCS2B01G150500	0.58575	0.60094
TraesCS2B01G152300	1.585	3.1326
TraesCS2B01G159500	0.84964	0.76118
TraesCS2B01G160100	2.3712	2.4602
TraesCS2B01G160700	0.59096	0.93746
TraesCS2B01G169700	0.59839	0.87316
TraesCS2B01G172600	-2.1634	-3.0405
TraesCS2B01G172900	0.71012	1.0651
TraesCS2B01G174600	-1.4792	-1.3202
TraesCS2B01G181100	1.0956	0.69211
TraesCS2B01G182700	-3.2833	-4.8358
TraesCS2B01G182800	0.72435	1.2648
TraesCS2B01G183500	-0.49523	-0.833
TraesCS2B01G186500	0.91172	1.1314
TraesCS2B01G186600	-2.9855	#NAME?
TraesCS2B01G188800	0.78775	0.8373
TraesCS2B01G191900	1.7575	1.6868
TraesCS2B01G193000	-1.1866	0.76737
TraesCS2B01G199200	#NAME?	#NAME?
TraesCS2B01G199800	-1.0836	-3.1241
TraesCS2B01G201500	1.1237	1.3524
TraesCS2B01G201800	-1.2147	-2.3884
TraesCS2B01G204700	-1.2193	-0.98933
TraesCS2B01G210700	0.57939	0.77993
TraesCS2B01G211900	#NAME?	#NAME?
TraesCS2B01G219100	-1.1904	-1.9672
TraesCS2B01G221600	-0.4153	-0.73143
TraesCS2B01G224500	-0.78035	-1.0706
TraesCS2B01G225200	0.51898	0.63387
TraesCS2B01G225800	0.4443	0.4094
TraesCS2B01G226800	-1.8191	-2.1871
TraesCS2B01G228700	-1.0517	-1.0968
TraesCS2B01G229400	-2.0352	-3.9886
TraesCS2B01G230700	-3.4814	-3.4009
TraesCS2B01G231000	-1.0366	-1.4899
TraesCS2B01G235700	1.2516	1.2997
TraesCS2B01G236500	#NAME?	-4.4381
TraesCS2B01G237200	0.45217	0.49999
TraesCS2B01G238300	-4.6644	-2.7161
TraesCS2B01G246000	-1.0265	-1.3494
TraesCS2B01G246900	-0.86258	-0.91479
TraesCS2B01G247200	1.1754	1.3805
TraesCS2B01G247500	-1.0329	-0.96537
TraesCS2B01G251300	1.6962	3.1343
TraesCS2B01G256300	-1.8978	-3.2031
TraesCS2B01G257200	0.38934	0.5306
TraesCS2B01G261500	0.81862	1.0593
TraesCS2B01G262200	0.52415	0.55698
TraesCS2B01G262600	-1.158	-1.343
TraesCS2B01G263000	0.57432	0.54354
TraesCS2B01G263500	0.34296	0.44587
TraesCS2B01G264100	-1.202	-2.4617
TraesCS2B01G266600	-4.7584	-7.178
TraesCS2B01G266700	-1.2314	-2.9044
TraesCS2B01G266900	1.5473	1.8924
TraesCS2B01G268800	1.2548	1.0468
TraesCS2B01G268900	0.74966	1.0049
TraesCS2B01G270400	0.80172	1.0375
TraesCS2B01G271400	2.2103	1.7996
TraesCS2B01G274400	0.39943	0.63042
TraesCS2B01G277300	-0.82349	-1.3176
TraesCS2B01G279700	#NAME?	-4.8404
TraesCS2B01G281600	0.75773	0.8877
TraesCS2B01G286400	-2.375	-2.2789
TraesCS2B01G287500	-0.7008	-1.25
TraesCS2B01G290200	-0.88256	-1.7731
TraesCS2B01G291200	0.50914	0.62958
TraesCS2B01G296400	-1.2723	-1.1492
TraesCS2B01G300200	-0.5328	-0.90554
TraesCS2B01G308200	0.82128	0.96756
TraesCS2B01G310800	-0.81002	-1.1769
TraesCS2B01G310900	-1.2449	-1.6678
TraesCS2B01G312400	-1.0146	-1.5157
TraesCS2B01G315000	1.7716	1.6805
TraesCS2B01G316400	0.61628	0.99415
TraesCS2B01G320100	0.61945	0.81297
TraesCS2B01G320300	-1.7197	-2.1579
TraesCS2B01G320800	0.5876	0.64514
TraesCS2B01G321500	1.0315	1.1464
TraesCS2B01G322000	-1.0258	-1.1432
TraesCS2B01G324200	2.4154	2.2491
TraesCS2B01G325600	0.5098	0.72377
TraesCS2B01G326400	0.39196	0.68779
TraesCS2B01G332400	0.99192	0.77576
TraesCS2B01G350500	0.92231	1.1206
TraesCS2B01G359000	-1.6908	-2.7178
TraesCS2B01G364800	1.0495	1.149
TraesCS2B01G365500	1.0119	0.95174
TraesCS2B01G366600	0.93055	1.1761
TraesCS2B01G366800	0.84091	0.87672
TraesCS2B01G367700	1.2416	1.7447
TraesCS2B01G368000	0.81289	0.83517
TraesCS2B01G371400	-1.1102	-1.2183
TraesCS2B01G371800	-1.0192	-1.2183
TraesCS2B01G372500	-4.1327	-3.1176
TraesCS2B01G385700	-0.9797	-0.99004
TraesCS2B01G394800	-0.88794	-0.97541
TraesCS2B01G395900	0.79195	0.88995
TraesCS2B01G396300	-1.0519	-1.055
TraesCS2B01G397800	0.66266	0.99142
TraesCS2B01G404900	0.46016	0.6018
TraesCS2B01G408500	0.40697	0.46089
TraesCS2B01G410100	-1.4293	-3.1226
TraesCS2B01G419300	-1.9902	-1.7356
TraesCS2B01G421200	0.52768	0.68983
TraesCS2B01G424200	-3.3862	-2.7172
TraesCS2B01G424800	1.4469	1.6992
TraesCS2B01G432000	2.5622	4.4795
TraesCS2B01G432500	-3.4024	-4.0028
TraesCS2B01G435400	-0.63596	-1.0339
TraesCS2B01G451800	Inf	Inf
TraesCS2B01G454500	0.63663	0.73579
TraesCS2B01G468100	-2.6439	-2.6316
TraesCS2B01G477600	1.0505	1.5954
TraesCS2B01G480000	0.54325	0.4493
TraesCS2B01G480200	1.1064	0.92115
TraesCS2B01G497300	2.9894	4.2572
TraesCS2B01G499100	-3.8473	-3.6409
TraesCS2B01G501200	0.69497	0.58572
TraesCS2B01G504600	0.82103	1.134
TraesCS2B01G510800	1.1644	1.0169
TraesCS2B01G514000	#NAME?	#NAME?
TraesCS2B01G531200	0.61563	0.6628
TraesCS2B01G532300	-1.6563	-1.8293
TraesCS2B01G533900	0.64833	1.366
TraesCS2B01G540200	Inf	Inf
TraesCS2B01G542000	-0.65941	-1.0936
TraesCS2B01G542200	0.76001	1.177
TraesCS2B01G546500	-1.8587	-3.8458
TraesCS2B01G549500	-1.1421	-2.4037
TraesCS2B01G550200	-2.2118	-2.4735
TraesCS2B01G550700	-1.4185	-1.9884
TraesCS2B01G553600	-1.2961	-1.6272
TraesCS2B01G556100	-1.0085	-1.6908
TraesCS2B01G569400	0.96985	1.0997
TraesCS2B01G572000	Inf	Inf
TraesCS2B01G575000	-3.2604	-4.1917
TraesCS2B01G578800	-0.47442	-0.85726
TraesCS2B01G580400	Inf	Inf
TraesCS2B01G584000	-2.077	-1.4896
TraesCS2B01G585100	0.84146	1.4696
TraesCS2B01G586500	0.78633	1.058
TraesCS2B01G592400	-0.80696	-1.4003
TraesCS2B01G602900	1.6489	1.6827
TraesCS2B01G603000	-1.9814	0.82898
TraesCS2B01G612300	-0.81715	-0.51851
TraesCS2D01G001300	0.80057	1.4686
TraesCS2D01G006400	#NAME?	#NAME?
TraesCS2D01G007100	0.70952	0.91592
TraesCS2D01G017700	1.2781	1.2738
TraesCS2D01G019700	3.8958	4.7246
TraesCS2D01G019800	2.6873	3.6045
TraesCS2D01G022900	0.47849	0.37844
TraesCS2D01G023900	-0.97505	-1.1033
TraesCS2D01G061700	-1.5857	-1.9717
TraesCS2D01G062500	-1.7784	-1.5509
TraesCS2D01G063200	0.51519	0.66312
TraesCS2D01G069500	0.54509	0.80454
TraesCS2D01G071500	0.62756	0.72525
TraesCS2D01G084300	1.1469	1.4044
TraesCS2D01G085100	0.54879	0.99307
TraesCS2D01G087900	0.43327	0.57782
TraesCS2D01G092500	-1.0856	-0.98083
TraesCS2D01G097200	-0.7285	-0.87442
TraesCS2D01G098100	1.5494	2.067
TraesCS2D01G106400	2.2034	2.652
TraesCS2D01G107000	Inf	Inf
TraesCS2D01G109900	0.71295	0.44447
TraesCS2D01G113200	-1.1553	-1.5126
TraesCS2D01G113300	2.6311	3.4316
TraesCS2D01G115300	2.7813	2.924
TraesCS2D01G117200	0.79027	1.1728
TraesCS2D01G120400	-0.73242	-1.8286
TraesCS2D01G124700	-0.75862	-1.598
TraesCS2D01G127700	-2.0448	-2.7354
TraesCS2D01G130200	-1.195	-1.0334
TraesCS2D01G130900	0.75149	0.69756
TraesCS2D01G131300	1.2611	1.5415
TraesCS2D01G131500	2.8626	2.7792
TraesCS2D01G132200	1.0366	2.4305
TraesCS2D01G133900	-0.92524	-1.7381
TraesCS2D01G138100	0.73567	0.70046
TraesCS2D01G141500	-0.87724	-1.8369
TraesCS2D01G144500	1.3731	1.5028
TraesCS2D01G151700	-2.9379	-3.1269
TraesCS2D01G151900	-1.6953	-2.6447
TraesCS2D01G160700	0.93748	0.89766
TraesCS2D01G167600	0.84086	1.0065
TraesCS2D01G169800	-0.84243	-2.3101
TraesCS2D01G179600	-1.024	-1.2661
TraesCS2D01G180100	-1.8251	-4.4742
TraesCS2D01G180700	-2.351	-2.4365
TraesCS2D01G182800	-1.3829	-1.6192
TraesCS2D01G185000	0.66517	0.84269
TraesCS2D01G188400	-0.67048	-0.82652
TraesCS2D01G193100	#NAME?	-5.2421
TraesCS2D01G194000	-0.81182	-2.4854
TraesCS2D01G199500	-1.2206	-2.6639
TraesCS2D01G200300	1.5033	2.1575
TraesCS2D01G200400	0.58113	0.86988
TraesCS2D01G202900	-1.7605	-3.0535
TraesCS2D01G212100	0.49868	0.7777
TraesCS2D01G212300	-2.2726	-3.867
TraesCS2D01G215300	0.44706	0.53694
TraesCS2D01G217900	-1.5724	-1.1574
TraesCS2D01G218000	0.38524	0.39181
TraesCS2D01G223300	2.0113	2.3952
TraesCS2D01G225500	#NAME?	#NAME?
TraesCS2D01G226600	0.6997	0.62998
TraesCS2D01G228000	-0.73571	-0.93081
TraesCS2D01G228200	#NAME?	-4.4739
TraesCS2D01G230500	0.59246	0.67221
TraesCS2D01G230700	0.69882	0.80009
TraesCS2D01G230900	-1.8424	-1.6869
TraesCS2D01G231900	0.5111	0.67028
TraesCS2D01G233300	0.58475	0.33478
TraesCS2D01G238100	0.4244	0.57679
TraesCS2D01G238600	-0.83613	-1.6968
TraesCS2D01G238700	-1.4195	-1.4387
TraesCS2D01G239800	0.52891	0.69481
TraesCS2D01G241300	0.5008	0.38948
TraesCS2D01G246700	0.83181	1.2433
TraesCS2D01G246800	0.75507	1.4975
TraesCS2D01G248500	0.47988	0.70468
TraesCS2D01G248900	0.84244	0.943
TraesCS2D01G250000	0.73491	0.86773
TraesCS2D01G250100	1.1353	1.0653
TraesCS2D01G253600	-1.0945	-2.4139
TraesCS2D01G259200	-0.54126	-1.3187
TraesCS2D01G259500	-1.0297	-1.3324
TraesCS2D01G263300	0.7405	1.0601
TraesCS2D01G263800	-0.68477	-0.86596
TraesCS2D01G271800	-1.7759	-1.4213
TraesCS2D01G272500	1.0182	1.4512
TraesCS2D01G272600	-1.7006	-1.5932
TraesCS2D01G273000	-0.69124	-0.83269
TraesCS2D01G273100	0.67298	0.65291
TraesCS2D01G273700	0.86167	0.73557
TraesCS2D01G283300	0.60222	0.42517
TraesCS2D01G288400	0.57482	1.9496
TraesCS2D01G293900	-0.4578	-1.3164
TraesCS2D01G302000	1.1647	1.6649
TraesCS2D01G302700	0.96068	1.4655
TraesCS2D01G304900	-1.2184	-3.4104
TraesCS2D01G307000	0.69322	0.92148
TraesCS2D01G307800	1.2858	1.5859
TraesCS2D01G308800	1.8332	2.0597
TraesCS2D01G309000	-1.3607	-1.4756
TraesCS2D01G311500	-1.4124	-2.3588
TraesCS2D01G313000	-1.0479	-1.738
TraesCS2D01G316200	-2.1204	-5.2663
TraesCS2D01G328100	-1.387	-1.3529
TraesCS2D01G338500	-3.9716	-1.8246
TraesCS2D01G340700	0.85212	0.35036
TraesCS2D01G342900	1.0527	2.4298
TraesCS2D01G345900	-2.2354	-2.0686
TraesCS2D01G348000	0.5784	0.78119
TraesCS2D01G348200	0.96065	0.97314
TraesCS2D01G350600	-1.2223	-1.7011
TraesCS2D01G352100	-1.3795	-2.2566
TraesCS2D01G357300	Inf	Inf
TraesCS2D01G365100	-3.2173	-1.5053
TraesCS2D01G374200	-1.3122	-1.8465
TraesCS2D01G376000	-1.2606	-1.4003
TraesCS2D01G376100	-1.6346	-2.7216
TraesCS2D01G378200	0.88619	0.77852
TraesCS2D01G378700	-1.7172	-4.1751
TraesCS2D01G388500	1.5575	2.4699
TraesCS2D01G394500	-0.92571	-1.2518
TraesCS2D01G394800	0.95343	1.1625
TraesCS2D01G398700	0.45898	0.81192
TraesCS2D01G398800	1.1318	1.2874
TraesCS2D01G399400	1.301	0.9875
TraesCS2D01G407700	0.54932	0.67435
TraesCS2D01G410900	-1.9269	-1.9794
TraesCS2D01G415800	-1.2859	-1.2477
TraesCS2D01G417100	0.74998	1.1324
TraesCS2D01G423400	-1.3638	-1.8338
TraesCS2D01G424100	-4.1329	-3.171
TraesCS2D01G425100	0.76782	1.2166
TraesCS2D01G431400	4.1894	5.0669
TraesCS2D01G433100	0.44977	0.83407
TraesCS2D01G438000	2.2231	2.6983
TraesCS2D01G443100	-0.99882	-1.313
TraesCS2D01G443700	0.87597	1.5751
TraesCS2D01G447500	0.68461	-0.61644
TraesCS2D01G448500	-1.1363	-1.1488
TraesCS2D01G453800	-1.1719	-1.8454
TraesCS2D01G455000	-1.215	-0.68159
TraesCS2D01G458300	0.80139	0.67533
TraesCS2D01G459900	-0.86042	-0.74973
TraesCS2D01G460600	0.68581	0.72818
TraesCS2D01G464300	0.73248	0.92765
TraesCS2D01G464700	1.6147	2.0879
TraesCS2D01G466200	Inf	Inf
TraesCS2D01G473300	-2.2977	#NAME?
TraesCS2D01G475300	#NAME?	#NAME?
TraesCS2D01G477900	1.3128	1.7012
TraesCS2D01G491600	0.85575	1.1031
TraesCS2D01G501700	-1.2265	-1.6713
TraesCS2D01G504000	0.79537	0.74416
TraesCS2D01G507900	0.99417	1.6499
TraesCS2D01G519500	-1.0614	-2.8581
TraesCS2D01G522500	-2.6575	-4.0878
TraesCS2D01G528500	-1.5488	-4.3725
TraesCS2D01G528800	-1.4816	-2.2457
TraesCS2D01G530600	-4.5696	-3.4889
TraesCS2D01G549000	0.70236	0.86003
TraesCS2D01G549400	0.92846	0.57512
TraesCS2D01G553300	-2.1523	-2.8834
TraesCS2D01G553800	-1.4683	-2.0756
TraesCS2D01G559100	1.6554	1.1481
TraesCS2D01G560200	-2.1101	-2.1806
TraesCS2D01G562500	-2.7241	-1.5931
TraesCS2D01G571000	-2.9295	-5.1481
TraesCS2D01G573300	-1.1979	-1.5344
TraesCS2D01G576000	0.72296	-1.4432
TraesCS2D01G576800	0.76311	0.96069
TraesCS2D01G581700	1.5097	2.0698
TraesCS2D01G581800	1.9677	2.9433
TraesCS2D01G583100	-2.5825	-4.0895
TraesCS2D01G599400	-2.5912	-3.1648
TraesCS3A01G000600	-2.616	-2.6745
TraesCS3A01G003800	0.47284	0.98168
TraesCS3A01G007300	-0.77409	-1.5073
TraesCS3A01G013500	5.1498	5.7261
TraesCS3A01G018500	0.70459	0.70518
TraesCS3A01G022500	0.58318	0.66134
TraesCS3A01G024900	0.8182	1.0216
TraesCS3A01G028200	#NAME?	#NAME?
TraesCS3A01G034600	1.0842	1.368
TraesCS3A01G034900	3.2214	4.4524
TraesCS3A01G041200	-0.63226	-0.84745
TraesCS3A01G041800	-2.0565	-4.2237
TraesCS3A01G056400	-1.7364	-1.1989
TraesCS3A01G057000	-1.8747	-1.9953
TraesCS3A01G064400	0.87904	1.1983
TraesCS3A01G069200	0.88675	1.3203
TraesCS3A01G073400	0.469	0.2857
TraesCS3A01G075800	Inf	Inf
TraesCS3A01G076200	-1.834	-2.3249
TraesCS3A01G078200	-0.72628	-1.215
TraesCS3A01G079400	-0.64091	-0.96038
TraesCS3A01G084300	1.0326	1.0656
TraesCS3A01G086200	-1.246	-0.99024
TraesCS3A01G087400	0.87202	1.5072
TraesCS3A01G095200	0.98989	1.2248
TraesCS3A01G095300	0.74946	1.3616
TraesCS3A01G099000	1.4559	2.5396
TraesCS3A01G103000	1.1799	1.7063
TraesCS3A01G104100	-2.9797	-2.5438
TraesCS3A01G105100	-1.3872	-1.1545
TraesCS3A01G105800	1.1647	1.3124
TraesCS3A01G105900	-1.7452	-2.7956
TraesCS3A01G108800	-2.8129	-2.3744
TraesCS3A01G109500	1.6133	1.8118
TraesCS3A01G109900	0.40733	0.6404
TraesCS3A01G112800	-1.8007	-1.4199
TraesCS3A01G120100	1.4088	2.2705
TraesCS3A01G120300	-2.0161	-1.5036
TraesCS3A01G127200	0.95272	0.97489
TraesCS3A01G132200	0.9723	0.95633
TraesCS3A01G133100	-1.9148	-1.8149
TraesCS3A01G139000	1.4659	1.4634
TraesCS3A01G143500	0.63224	0.68275
TraesCS3A01G143800	0.81399	1.0611
TraesCS3A01G144800	-2.4089	-1.6984
TraesCS3A01G145900	-1.4785	-1.9176
TraesCS3A01G155400	0.60412	0.87213
TraesCS3A01G158100	-5.4325	-5.3917
TraesCS3A01G158500	-0.97864	-1.0769
TraesCS3A01G161000	-0.55951	-0.44642
TraesCS3A01G164200	0.48605	0.71849
TraesCS3A01G171300	-2.2333	-3.066
TraesCS3A01G172000	-0.8183	-1.2967
TraesCS3A01G181100	0.73572	0.8534
TraesCS3A01G182200	-0.55971	-1.1635
TraesCS3A01G184800	-3.8166	-2.6332
TraesCS3A01G185300	0.47557	0.92385
TraesCS3A01G189000	-1.321	-1.4215
TraesCS3A01G194300	-0.71629	-0.8491
TraesCS3A01G194600	-0.8072	-0.58362
TraesCS3A01G199100	0.43202	0.39903
TraesCS3A01G201000	0.57801	0.85304
TraesCS3A01G201200	0.50709	0.77647
TraesCS3A01G205800	-2.2899	-1.8868
TraesCS3A01G206000	-1.3727	-1.7459
TraesCS3A01G209300	-1.2064	-2.0877
TraesCS3A01G210400	0.39768	0.30977
TraesCS3A01G211400	-1.0969	-1.1731
TraesCS3A01G212000	-1.1145	-1.472
TraesCS3A01G212300	4.1274	4.1386
TraesCS3A01G212900	-0.68085	-0.90799
TraesCS3A01G214000	-2.0525	-3.9291
TraesCS3A01G215200	-0.82728	-1.5978
TraesCS3A01G222700	-1.3428	-5.0836
TraesCS3A01G224200	0.91296	1.2821
TraesCS3A01G227900	0.55569	1.1677
TraesCS3A01G228000	0.61495	0.70135
TraesCS3A01G228800	0.43542	0.31627
TraesCS3A01G229300	1.6527	2.0398
TraesCS3A01G229400	1.0249	0.89725
TraesCS3A01G231400	-1.313	-2.262
TraesCS3A01G232700	-0.3941	-0.42052
TraesCS3A01G241300	-1.3219	-2.7551
TraesCS3A01G242200	0.56848	0.81677
TraesCS3A01G242400	0.99832	0.96868
TraesCS3A01G245700	0.52289	0.7364
TraesCS3A01G246900	0.69569	1.0511
TraesCS3A01G251100	1.1406	1.2532
TraesCS3A01G252500	2.2833	2.8081
TraesCS3A01G252800	0.81352	0.934
TraesCS3A01G255000	1.0704	1.3608
TraesCS3A01G258700	0.95658	1.2663
TraesCS3A01G259600	1.0595	0.86571
TraesCS3A01G260700	-1.7969	-1.7271
TraesCS3A01G261200	0.44094	0.55934
TraesCS3A01G261700	2.3658	3.2955
TraesCS3A01G273500	1.3662	1.4255
TraesCS3A01G273700	-1.9501	-1.6396
TraesCS3A01G277200	0.5824	1.3319
TraesCS3A01G281200	-1.4972	-2.0231
TraesCS3A01G283600	-0.5414	-2.0156
TraesCS3A01G284800	0.89655	0.62958
TraesCS3A01G291600	-0.61901	-0.61418
TraesCS3A01G296500	-1.4506	-1.8209
TraesCS3A01G297300	Inf	Inf
TraesCS3A01G300400	2.1713	3.0041
TraesCS3A01G300800	0.56334	0.74278
TraesCS3A01G301600	-1.638	-2.1413
TraesCS3A01G303600	1.4063	1.6979
TraesCS3A01G304300	-1.1413	-1.9307
TraesCS3A01G312500	-1.9799	-3.087
TraesCS3A01G315700	5.2807	6.0159
TraesCS3A01G317700	0.72768	0.71582
TraesCS3A01G319800	0.64517	1.3845
TraesCS3A01G321300	0.73479	0.8449
TraesCS3A01G323100	0.58891	0.79218
TraesCS3A01G326500	-1.4238	-1.8682
TraesCS3A01G326700	1.2832	1.6217
TraesCS3A01G336600	0.88803	1.337
TraesCS3A01G337900	-2.0954	-2.1768
TraesCS3A01G342800	0.52417	0.77412
TraesCS3A01G347300	1.9923	1.8717
TraesCS3A01G349000	-2.4086	-1.7491
TraesCS3A01G350900	-1.3544	-1.711
TraesCS3A01G351400	1.951	2.1099
TraesCS3A01G353800	0.60867	0.94717
TraesCS3A01G356500	1.4635	1.7616
TraesCS3A01G360000	-1.6326	-2.1065
TraesCS3A01G370000	0.87294	0.96973
TraesCS3A01G375000	-5.1857	-2.9372
TraesCS3A01G377300	0.4119	0.71704
TraesCS3A01G381900	0.65624	1.175
TraesCS3A01G383700	0.81943	1.0177
TraesCS3A01G389100	-0.99259	-1.5858
TraesCS3A01G391000	1.1556	1.4246
TraesCS3A01G394500	-5.3219	-2.2898
TraesCS3A01G396300	0.51632	1.0676
TraesCS3A01G398600	-0.59779	-0.67609
TraesCS3A01G407200	-2.8946	-3.4006
TraesCS3A01G415900	-0.9539	-0.62744
TraesCS3A01G421600	-0.89751	-0.91551
TraesCS3A01G423700	-4.5189	-4.7419
TraesCS3A01G426400	-2.6578	-5.6724
TraesCS3A01G426600	-2.2763	-3.7238
TraesCS3A01G429800	-0.8691	-1.1099
TraesCS3A01G429900	-2.688	-2.1334
TraesCS3A01G431700	-0.90327	-1.0487
TraesCS3A01G441500	0.71227	1.0551
TraesCS3A01G442000	0.37169	0.3973
TraesCS3A01G442200	4.1065	5.0988
TraesCS3A01G449700	5.4284	5.96
TraesCS3A01G459100	0.41491	0.78492
TraesCS3A01G463500	0.6587	1.3574
TraesCS3A01G467100	0.91516	1.2144
TraesCS3A01G487500	2.0707	1.8695
TraesCS3A01G488800	-2.1945	-2.3974
TraesCS3A01G501600	4.0916	9.3853
TraesCS3A01G503300	0.60271	0.71697
TraesCS3A01G512900	1.3725	1.4472
TraesCS3A01G513100	-1.9764	-2.7117
TraesCS3A01G517700	0.69912	0.65913
TraesCS3A01G521300	1.3938	1.3596
TraesCS3A01G538000	1.1216	1.4519
TraesCS3A01G538400	-2.575	-2.0141
TraesCS3B01G001600	#NAME?	#NAME?
TraesCS3B01G005900	0.60403	0.8664
TraesCS3B01G006200	1.8553	3.0416
TraesCS3B01G012700	2.4671	3.4245
TraesCS3B01G017400	-2.6237	-2.4121
TraesCS3B01G028500	Inf	Inf
TraesCS3B01G032400	-2.1433	-2.3399
TraesCS3B01G034500	0.61077	1.086
TraesCS3B01G035900	-1.235	-2.1663
TraesCS3B01G040900	1.3001	1.6024
TraesCS3B01G045400	-2.0348	-2.4656
TraesCS3B01G049500	2.0663	1.8197
TraesCS3B01G062600	-9.7974	-8.0907
TraesCS3B01G063600	-3.1975	-4.0104
TraesCS3B01G064000	-3.8653	-3.7663
TraesCS3B01G064100	-3.3275	-4.2176
TraesCS3B01G065200	0.36032	0.54951
TraesCS3B01G081500	-0.96192	0.67377
TraesCS3B01G087600	0.67403	0.72652
TraesCS3B01G088900	0.8374	1.0182
TraesCS3B01G090100	-3.1191	-3.0513
TraesCS3B01G093300	0.4448	1.6559
TraesCS3B01G100100	-3.7297	-2.6368
TraesCS3B01G102800	0.71078	0.93202
TraesCS3B01G103200	1.0574	0.99404
TraesCS3B01G104200	-1.8239	-1.8012
TraesCS3B01G105600	0.6746	1.3382
TraesCS3B01G107500	-4.2257	-3.8962
TraesCS3B01G108200	-3.8268	-4.7592
TraesCS3B01G109200	1.6338	2.0147
TraesCS3B01G112100	0.78027	1.1798
TraesCS3B01G114200	1.2387	1.3334
TraesCS3B01G123600	-0.84504	-0.87571
TraesCS3B01G127800	-1.5664	-2.3652
TraesCS3B01G128700	5.0418	6.8344
TraesCS3B01G146600	0.44979	0.80953
TraesCS3B01G149300	0.52944	0.6133
TraesCS3B01G153900	-1.0972	-4.641
TraesCS3B01G154900	-1.6591	-2.8213
TraesCS3B01G156100	Inf	Inf
TraesCS3B01G158900	-4.2208	-1.8763
TraesCS3B01G168000	-2.2605	-4.223
TraesCS3B01G212900	-1.3046	-1.2077
TraesCS3B01G215900	0.6398	0.78835
TraesCS3B01G216900	1.0095	1.1813
TraesCS3B01G219400	-1.6471	-4.1969
TraesCS3B01G219800	-0.55164	-0.59451
TraesCS3B01G222400	-1.5567	-1.9339
TraesCS3B01G224400	0.57148	0.60274
TraesCS3B01G226400	0.48113	0.64251
TraesCS3B01G229200	0.80558	1.217
TraesCS3B01G230600	-0.59706	-0.58081
TraesCS3B01G232100	0.9574	0.54604
TraesCS3B01G238400	1.3784	1.4928
TraesCS3B01G239500	-0.50946	-1.1772
TraesCS3B01G239700	0.50586	0.70712
TraesCS3B01G241600	1.5945	2.1264
TraesCS3B01G242400	-0.8328	-1.806
TraesCS3B01G243000	-1.1982	-1.2596
TraesCS3B01G243200	-1.0282	-1.5054
TraesCS3B01G245400	0.7429	1.7331
TraesCS3B01G246000	-2.562	-7.1457
TraesCS3B01G252400	-0.91094	-2.2885
TraesCS3B01G254100	0.57101	0.78995
TraesCS3B01G254600	-0.75676	-0.76957
TraesCS3B01G255600	Inf	Inf
TraesCS3B01G255800	0.46508	0.43452
TraesCS3B01G256600	0.80648	1.2697
TraesCS3B01G266100	0.77633	0.66939
TraesCS3B01G270300	0.886	1.1021
TraesCS3B01G274900	4.1079	3.8194
TraesCS3B01G276900	1.3432	1.6971
TraesCS3B01G277200	0.67122	0.75682
TraesCS3B01G277500	0.57201	1.2498
TraesCS3B01G280100	-1.1467	-1.862
TraesCS3B01G284200	4.2663	4.1823
TraesCS3B01G284300	-0.60173	-1.0284
TraesCS3B01G284600	1.0147	1.2511
TraesCS3B01G287000	0.94179	1.4982
TraesCS3B01G292000	1.0917	0.92526
TraesCS3B01G298400	-1.8423	-2.8402
TraesCS3B01G302100	-1.0614	-0.62585
TraesCS3B01G303700	-2.2713	-2.5892
TraesCS3B01G314900	-0.82127	-2.051
TraesCS3B01G320200	0.95376	0.77549
TraesCS3B01G327200	-1.2317	-2.0896
TraesCS3B01G337600	0.91924	1.0784
TraesCS3B01G343500	-1.5608	-1.9258
TraesCS3B01G345900	0.44251	0.87659
TraesCS3B01G347500	0.84611	1.1756
TraesCS3B01G353800	-1.0383	-1.3715
TraesCS3B01G355800	-1.523	-1.5904
TraesCS3B01G356700	1.8279	2.1346
TraesCS3B01G357200	0.41222	0.65037
TraesCS3B01G357400	0.97539	1.8415
TraesCS3B01G360400	1.3839	1.0972
TraesCS3B01G360700	-1.1926	-2.4161
TraesCS3B01G361000	-1.3283	-1.4332
TraesCS3B01G361500	3.7593	3.5909
TraesCS3B01G363500	-2.3121	-3.7512
TraesCS3B01G367600	0.79453	1.1527
TraesCS3B01G370900	-0.35532	-0.66524
TraesCS3B01G373000	0.29679	0.47034
TraesCS3B01G374300	0.72395	0.68498
TraesCS3B01G375000	0.4722	0.80952
TraesCS3B01G377100	1.3419	1.2831
TraesCS3B01G391300	-0.75379	-1.1213
TraesCS3B01G399300	-3.2345	-4.5493
TraesCS3B01G407700	1.834	2.6044
TraesCS3B01G413400	3.2323	3.9003
TraesCS3B01G416100	0.73567	1.1484
TraesCS3B01G422800	2.0564	2.7154
TraesCS3B01G432300	3.0592	3.1879
TraesCS3B01G432900	-2.7602	-1.9275
TraesCS3B01G433900	5.6623	6.5762
TraesCS3B01G434200	2.2948	3.7666
TraesCS3B01G434400	3.7377	2.9678
TraesCS3B01G438900	-4.1985	-5.1311
TraesCS3B01G441000	-2.1645	-1.7057
TraesCS3B01G451800	-1.4334	-1.1434
TraesCS3B01G453500	-2.1302	-2.6943
TraesCS3B01G462800	-1.8683	-3.2282
TraesCS3B01G466000	-1.3007	-2.8344
TraesCS3B01G467500	0.92828	1.0051
TraesCS3B01G467700	-0.54384	-0.81223
TraesCS3B01G467900	-3.7311	-2.8269
TraesCS3B01G468800	1.8782	1.9999
TraesCS3B01G475800	0.49484	0.4041
TraesCS3B01G477300	-1.9236	-3.871
TraesCS3B01G486000	-1.0311	-1.469
TraesCS3B01G486800	3.3139	3.8267
TraesCS3B01G489500	-1.5094	-3.142
TraesCS3B01G490700	-3.3648	-3.339
TraesCS3B01G512500	0.93297	0.9663
TraesCS3B01G525300	1.8719	3.1881
TraesCS3B01G526500	#NAME?	#NAME?
TraesCS3B01G543900	0.68111	1.0987
TraesCS3B01G552300	0.94491	1.0498
TraesCS3B01G556300	3.6866	2.7114
TraesCS3B01G558300	0.45857	0.54955
TraesCS3B01G559400	-0.80592	-1.1342
TraesCS3B01G565800	0.70237	1.4129
TraesCS3B01G566700	0.96801	1.2896
TraesCS3B01G568500	-2.2973	-3.4873
TraesCS3B01G569800	-1.5426	-2.1173
TraesCS3B01G571400	0.64539	1.1539
TraesCS3B01G585300	0.75824	0.72295
TraesCS3B01G592300	0.5715	1.0036
TraesCS3B01G592800	-2.017	-1.4123
TraesCS3D01G003800	-0.55416	-1.4698
TraesCS3D01G020200	-0.48886	-0.83877
TraesCS3D01G020600	2.0369	1.678
TraesCS3D01G020700	1.4466	1.0661
TraesCS3D01G025300	-2.0908	-1.502
TraesCS3D01G030600	1.2333	1.9395
TraesCS3D01G032000	0.51935	0.9413
TraesCS3D01G033600	3.5985	2.8348
TraesCS3D01G037200	0.89714	1.0618
TraesCS3D01G047100	1.6986	2.2548
TraesCS3D01G053600	0.49156	0.57659
TraesCS3D01G056500	0.46842	0.99971
TraesCS3D01G060600	-1.2107	-1.6569
TraesCS3D01G063800	0.91464	1.9022
TraesCS3D01G065800	-1.503	-1.1291
TraesCS3D01G070200	0.52619	0.46366
TraesCS3D01G079800	-0.57819	-0.60651
TraesCS3D01G080100	0.8601	1.1836
TraesCS3D01G083800	0.69448	0.77732
TraesCS3D01G107900	1.5666	2.7993
TraesCS3D01G108000	0.92757	0.8205
TraesCS3D01G108300	-1.3892	-2.119
TraesCS3D01G109800	-2.6813	-1.226
TraesCS3D01G111300	2.0886	3.0007
TraesCS3D01G112400	0.76295	0.64149
TraesCS3D01G117300	2.4502	2.226
TraesCS3D01G118600	2.8015	2.6433
TraesCS3D01G118700	1.4484	0.97107
TraesCS3D01G126200	1.0508	1.2086
TraesCS3D01G128600	0.47903	0.40572
TraesCS3D01G131100	0.67006	0.57621
TraesCS3D01G136800	-2.056	-4.7274
TraesCS3D01G137700	-3.2477	-3.4938
TraesCS3D01G137800	-2.4844	-2.7365
TraesCS3D01G139300	1.1874	1.3382
TraesCS3D01G139800	1.3084	1.1537
TraesCS3D01G140700	1.1926	1.913
TraesCS3D01G141300	-1.2051	-3.448
TraesCS3D01G148100	-1.4978	-1.1963
TraesCS3D01G149300	-1.354	-1.8367
TraesCS3D01G151500	-2.692	-3.764
TraesCS3D01G152000	-4.9483	#NAME?
TraesCS3D01G159100	-1.0939	-1.0377
TraesCS3D01G164500	0.41316	0.67042
TraesCS3D01G171500	-2.6085	-2.5288
TraesCS3D01G176800	-0.99343	-1.7883
TraesCS3D01G177600	0.77124	1.1848
TraesCS3D01G180500	0.61964	0.81966
TraesCS3D01G186800	#NAME?	#NAME?
TraesCS3D01G190300	0.55164	1.0281
TraesCS3D01G191200	0.70161	0.72843
TraesCS3D01G191800	-0.60806	-1.1105
TraesCS3D01G195800	-0.84867	-0.73421
TraesCS3D01G200300	-1.2708	-2.2913
TraesCS3D01G201000	0.65768	0.79606
TraesCS3D01G202800	0.60084	0.81334
TraesCS3D01G204000	0.45529	0.68563
TraesCS3D01G204400	0.52451	0.48851
TraesCS3D01G205500	-0.66499	-0.9128
TraesCS3D01G209800	-2.9956	-4.9315
TraesCS3D01G211400	0.80594	1.2714
TraesCS3D01G212400	0.68009	0.99278
TraesCS3D01G213100	0.3971	0.59376
TraesCS3D01G213200	0.55065	0.44523
TraesCS3D01G215300	-1.0473	-2.7688
TraesCS3D01G216000	0.5414	0.43321
TraesCS3D01G219200	1.2545	2.9466
TraesCS3D01G219400	-3.4784	#NAME?
TraesCS3D01G225600	0.66202	0.87073
TraesCS3D01G226000	-1.1485	-1.6598
TraesCS3D01G228400	0.62393	1.1684
TraesCS3D01G228800	-0.64976	-0.86416
TraesCS3D01G229400	0.59287	0.69968
TraesCS3D01G233700	-1.4625	-2.3042
TraesCS3D01G236200	-0.63856	-0.46268
TraesCS3D01G242300	1.0179	1.128
TraesCS3D01G243800	-0.36746	-0.96392
TraesCS3D01G245800	0.50684	0.79965
TraesCS3D01G245900	0.71819	0.8556
TraesCS3D01G246500	0.52242	0.67706
TraesCS3D01G248400	0.66245	1.0654
TraesCS3D01G248700	0.93377	1.4198
TraesCS3D01G251500	1.5561	1.525
TraesCS3D01G253500	1.1752	1.6321
TraesCS3D01G253900	-3.6973	#NAME?
TraesCS3D01G259600	1.9449	1.558
TraesCS3D01G260200	1.5018	1.5714
TraesCS3D01G262600	0.72872	0.61398
TraesCS3D01G268200	-4.376	-1.8285
TraesCS3D01G273800	-1.0337	-1.8129
TraesCS3D01G278000	1.268	2.0201
TraesCS3D01G281100	-1.4373	-1.9837
TraesCS3D01G283500	-0.38093	-1.0864
TraesCS3D01G288200	#NAME?	#NAME?
TraesCS3D01G296600	2.3601	2.0311
TraesCS3D01G298200	1.9048	2.3835
TraesCS3D01G299200	1.1514	1.887
TraesCS3D01G299700	0.47445	0.54396
TraesCS3D01G301000	0.69011	0.57737
TraesCS3D01G306600	-2.7289	-3.0709
TraesCS3D01G307700	-1.4054	-2.0357
TraesCS3D01G309500	Inf	Inf
TraesCS3D01G312800	0.97644	1.2493
TraesCS3D01G312900	0.78108	0.80596
TraesCS3D01G315100	0.68437	1.0654
TraesCS3D01G317400	1.1004	0.75029
TraesCS3D01G319900	-1.1238	-1.0532
TraesCS3D01G323000	-5.1302	-3.4503
TraesCS3D01G323800	1.2063	1.3303
TraesCS3D01G326700	0.65426	1.0077
TraesCS3D01G326900	-1.9962	-3.974
TraesCS3D01G328000	-1.4367	-1.4565
TraesCS3D01G329500	0.94395	1.1045
TraesCS3D01G329900	-1.5268	-2.0933
TraesCS3D01G341000	1.2963	1.7059
TraesCS3D01G342900	-2.6666	-2.3176
TraesCS3D01G352800	-0.69621	-1.334
TraesCS3D01G353800	5.0109	4.1122
TraesCS3D01G354000	2.5637	2.896
TraesCS3D01G356600	0.78616	0.65003
TraesCS3D01G358800	-1.2889	-2.5041
TraesCS3D01G360100	1.0782	0.96893
TraesCS3D01G365200	#NAME?	#NAME?
TraesCS3D01G371400	-1.2982	-0.90245
TraesCS3D01G375200	-0.78978	-1.5199
TraesCS3D01G376800	0.95125	1.1644
TraesCS3D01G377100	0.57862	1.0826
TraesCS3D01G380200	-3.0638	-2.6371
TraesCS3D01G385700	#NAME?	#NAME?
TraesCS3D01G388700	0.92213	1.2678
TraesCS3D01G390300	0.60874	0.88779
TraesCS3D01G391300	0.86058	1.1172
TraesCS3D01G392300	0.7592	0.90275
TraesCS3D01G402500	-1.2601	-2.613
TraesCS3D01G403100	1.0732	1.1346
TraesCS3D01G413800	-1.2942	-1.6813
TraesCS3D01G421100	-2.371	-3.9107
TraesCS3D01G421500	-2.1892	-3.183
TraesCS3D01G425300	-2.0141	-1.254
TraesCS3D01G426800	0.44657	0.49274
TraesCS3D01G431900	Inf	Inf
TraesCS3D01G432500	-1.1877	-1.1259
TraesCS3D01G434300	0.9606	1.7342
TraesCS3D01G434700	0.56856	0.40982
TraesCS3D01G436100	-1.3328	-2.6558
TraesCS3D01G438800	0.57645	1.2547
TraesCS3D01G440500	0.9955	-2.8075
TraesCS3D01G446800	1.4892	1.1839
TraesCS3D01G451200	1.7804	3.3002
TraesCS3D01G475800	2.2631	2.8852
TraesCS3D01G480100	-0.54295	-4.2301
TraesCS3D01G490000	0.70552	1.0829
TraesCS3D01G496200	#NAME?	#NAME?
TraesCS3D01G499300	-3.1191	-2.5511
TraesCS3D01G505500	-4.3668	#NAME?
TraesCS3D01G508800	1.3464	1.5961
TraesCS3D01G513800	-2.3852	-2.4226
TraesCS3D01G530500	-1.4713	-1.6598
TraesCS3D01G535600	-1.011	-1.4235
TraesCS3D01G540500	-2.6782	-2.0018
TraesCS4A01G000400	-4.3792	-2.848
TraesCS4A01G002400	0.5858	0.64467
TraesCS4A01G002700	1.2302	1.6395
TraesCS4A01G003600	1.3433	1.661
TraesCS4A01G005500	-1.4043	-5.3127
TraesCS4A01G015800	-0.89746	-0.945
TraesCS4A01G016200	1.0736	1.6276
TraesCS4A01G017400	1.3686	1.7715
TraesCS4A01G017800	-3.203	-4.1672
TraesCS4A01G020400	-0.65333	-1.4483
TraesCS4A01G021600	-1.3799	-3.8361
TraesCS4A01G022000	0.39662	0.42194
TraesCS4A01G029800	0.41689	0.79811
TraesCS4A01G030400	-1.0027	-0.73537
TraesCS4A01G036000	0.99076	1.477
TraesCS4A01G036200	1.3814	1.4748
TraesCS4A01G041600	-0.75461	-0.72068
TraesCS4A01G043600	-0.68448	-1.6923
TraesCS4A01G045700	-1.4275	-2.8929
TraesCS4A01G046600	-1.2652	-2.0892
TraesCS4A01G049500	0.74581	0.80893
TraesCS4A01G054800	-0.50141	-1.2218
TraesCS4A01G060300	0.52994	1.0073
TraesCS4A01G061000	1.2641	2.1146
TraesCS4A01G062300	-1.0427	-2.1898
TraesCS4A01G065300	-1.8739	-2.9132
TraesCS4A01G065900	#NAME?	-4.6975
TraesCS4A01G071400	0.53116	0.69166
TraesCS4A01G072400	1.1267	1.2392
TraesCS4A01G073300	#NAME?	#NAME?
TraesCS4A01G073800	0.74422	0.8946
TraesCS4A01G077200	0.50282	0.50602
TraesCS4A01G080200	-1.5256	-2.7063
TraesCS4A01G081100	0.57832	0.59368
TraesCS4A01G086000	-1.0311	-1.1634
TraesCS4A01G086500	0.80028	1.0493
TraesCS4A01G086600	0.49884	0.63477
TraesCS4A01G093800	1.0064	1.2232
TraesCS4A01G096500	0.86629	2.1127
TraesCS4A01G098000	-2.4481	-2.2379
TraesCS4A01G099200	0.56243	0.61835
TraesCS4A01G099400	0.56441	0.67589
TraesCS4A01G100800	-2.0638	-4.0436
TraesCS4A01G101500	-1.5902	-2.7445
TraesCS4A01G102200	-0.57383	-0.53795
TraesCS4A01G102600	2.7272	2.5142
TraesCS4A01G102700	0.38265	0.6103
TraesCS4A01G105000	0.60273	0.98482
TraesCS4A01G107600	-0.46369	-0.88673
TraesCS4A01G107700	-0.53871	-0.93507
TraesCS4A01G110100	1.278	1.6955
TraesCS4A01G112000	0.89949	1.1032
TraesCS4A01G114100	-0.38478	-0.94974
TraesCS4A01G119200	-0.48892	-1.5373
TraesCS4A01G119700	-0.50119	-0.78168
TraesCS4A01G129000	0.69083	1.2522
TraesCS4A01G134100	-1.9518	-1.5728
TraesCS4A01G138800	-0.86395	-1.4236
TraesCS4A01G145400	1.9069	1.9969
TraesCS4A01G148200	-1.2163	-0.94614
TraesCS4A01G149100	-1.4163	-1.2694
TraesCS4A01G154000	-1.2347	-3.3366
TraesCS4A01G157600	1.017	0.9635
TraesCS4A01G158000	-0.96057	-1.9124
TraesCS4A01G165700	-1.7416	-3.8806
TraesCS4A01G167400	-0.84694	-0.79653
TraesCS4A01G169200	0.50996	0.56487
TraesCS4A01G171500	1.9649	2.5681
TraesCS4A01G173700	4.7495	6.1348
TraesCS4A01G180000	1.2293	1.7635
TraesCS4A01G184100	-2.2334	-3.1349
TraesCS4A01G184900	0.89084	1.38
TraesCS4A01G194700	0.90346	0.85156
TraesCS4A01G197600	-0.95683	-1.2663
TraesCS4A01G199100	2.8653	3.952
TraesCS4A01G201000	0.80379	0.72384
TraesCS4A01G203900	-0.84597	-1.6069
TraesCS4A01G206900	0.41786	0.58943
TraesCS4A01G215300	-1.0718	-0.90855
TraesCS4A01G221400	0.42867	0.75277
TraesCS4A01G222600	Inf	Inf
TraesCS4A01G234300	-3.9031	-3.5704
TraesCS4A01G241100	-0.91415	-0.63342
TraesCS4A01G242500	-3.7369	-3.8089
TraesCS4A01G243100	0.71109	0.78667
TraesCS4A01G245100	-0.8423	-5.3368
TraesCS4A01G249600	0.84187	0.88599
TraesCS4A01G251200	1.3445	0.92437
TraesCS4A01G257100	1.3243	1.4552
TraesCS4A01G258100	-3.115	-1.8285
TraesCS4A01G258200	0.90765	0.77401
TraesCS4A01G262600	0.68779	0.62961
TraesCS4A01G263100	0.51818	0.60671
TraesCS4A01G263900	0.69645	1.1235
TraesCS4A01G268800	1.3257	1.6639
TraesCS4A01G269900	-2.4467	-3.1102
TraesCS4A01G274700	0.59059	1.3022
TraesCS4A01G276400	-0.57916	-1.4483
TraesCS4A01G276900	0.69588	1.0444
TraesCS4A01G278700	-4.3368	-3.081
TraesCS4A01G279800	1.6179	2.1352
TraesCS4A01G290600	0.73229	1.2718
TraesCS4A01G297300	0.92061	1.0663
TraesCS4A01G298100	#NAME?	-3.3504
TraesCS4A01G298600	-5.1729	-2.9023
TraesCS4A01G304400	-2.6208	-1.9221
TraesCS4A01G304600	#NAME?	-3.0722
TraesCS4A01G315500	-0.50381	-0.85331
TraesCS4A01G315700	-1.4931	-2.1501
TraesCS4A01G320100	0.94101	1.1522
TraesCS4A01G326800	0.69005	0.8191
TraesCS4A01G329600	0.35646	0.4232
TraesCS4A01G330400	-0.81493	-0.96485
TraesCS4A01G334800	-1.1954	-1.2544
TraesCS4A01G341100	1.0155	0.53084
TraesCS4A01G342800	-1.7822	-2.3361
TraesCS4A01G347000	-7.3671	#NAME?
TraesCS4A01G349300	-1.3813	-1.3072
TraesCS4A01G355100	-2.3831	-1.9072
TraesCS4A01G358100	0.71429	0.7039
TraesCS4A01G359200	-1.2031	-1.0434
TraesCS4A01G368800	-1.3208	-2.7225
TraesCS4A01G370000	-1.4539	-2.0694
TraesCS4A01G371600	0.62063	0.77222
TraesCS4A01G376000	-1.8738	-2.6984
TraesCS4A01G392700	Inf	Inf
TraesCS4A01G397900	2.9718	2.6118
TraesCS4A01G406500	-1.0828	-1.1249
TraesCS4A01G406900	0.95643	1.9209
TraesCS4A01G418600	5.171	4.588
TraesCS4A01G425300	1.3634	0.90285
TraesCS4A01G432400	-0.92531	-0.80531
TraesCS4A01G434000	-1.3008	-2.3197
TraesCS4A01G437500	3.0544	4.3216
TraesCS4A01G457700	-0.71894	-1.0535
TraesCS4A01G459300	0.55713	0.67041
TraesCS4A01G459600	8.299	9.2431
TraesCS4A01G471500	-2.4442	-4.0269
TraesCS4A01G481400	0.72619	0.60793
TraesCS4A01G498700	0.58826	0.66903
TraesCS4B01G000900	0.95402	0.68884
TraesCS4B01G003000	-0.94764	-0.72396
TraesCS4B01G007100	0.56246	0.70322
TraesCS4B01G012000	0.50316	0.53067
TraesCS4B01G012100	1.0388	1.4072
TraesCS4B01G014500	-1.8095	-1.8832
TraesCS4B01G015100	-0.96498	-1.7399
TraesCS4B01G018500	#NAME?	#NAME?
TraesCS4B01G038500	-2.0046	-1.7689
TraesCS4B01G045400	1.2685	1.5006
TraesCS4B01G049900	-2.5491	-3.64
TraesCS4B01G054000	-1.6017	-1.3194
TraesCS4B01G055200	2.2592	2.7745
TraesCS4B01G056200	0.72484	0.66608
TraesCS4B01G057300	0.67203	0.5086
TraesCS4B01G066800	-1.2322	-3.6932
TraesCS4B01G070400	6.1293	5.0031
TraesCS4B01G070900	-0.69586	-0.80386
TraesCS4B01G072000	0.43111	0.54119
TraesCS4B01G077400	-0.73685	-1.7212
TraesCS4B01G101900	0.58043	0.78237
TraesCS4B01G104100	Inf	Inf
TraesCS4B01G104300	0.57121	0.68683
TraesCS4B01G104700	0.87408	1.3059
TraesCS4B01G110500	0.50835	0.58211
TraesCS4B01G110600	-1.1048	-1.5907
TraesCS4B01G112200	-1.9672	-2.5103
TraesCS4B01G112700	-0.83828	-0.89519
TraesCS4B01G116300	Inf	Inf
TraesCS4B01G119100	-1.3357	-2.7845
TraesCS4B01G120600	0.706	0.65767
TraesCS4B01G121400	-0.91178	-0.77651
TraesCS4B01G127400	0.73822	1.6736
TraesCS4B01G133700	0.77583	1.2885
TraesCS4B01G142100	Inf	Inf
TraesCS4B01G149900	1.7499	1.6942
TraesCS4B01G156100	0.72549	1.0705
TraesCS4B01G156900	-1.2938	-2.1172
TraesCS4B01G158200	-1.8759	-2.3214
TraesCS4B01G163700	0.58998	0.94878
TraesCS4B01G167100	-4.9508	-2.9736
TraesCS4B01G170500	0.74072	1.5432
TraesCS4B01G170700	1.2765	1.8053
TraesCS4B01G172600	-0.82696	-0.96152
TraesCS4B01G175700	0.61118	0.88547
TraesCS4B01G177100	-4.0607	-3.978
TraesCS4B01G179700	-1.4722	-1.783
TraesCS4B01G179800	-3.1514	-2.1854
TraesCS4B01G182200	-2.0152	-3.3305
TraesCS4B01G184000	0.90882	1.4524
TraesCS4B01G187600	-1.4505	-3.9986
TraesCS4B01G187900	-1.6839	-1.7515
TraesCS4B01G190000	-0.40415	-1.0556
TraesCS4B01G194000	1.7169	1.9415
TraesCS4B01G196800	-0.48467	-1.0059
TraesCS4B01G197900	-0.96278	-0.97277
TraesCS4B01G199000	0.69875	0.69828
TraesCS4B01G203100	#NAME?	-4.9618
TraesCS4B01G203800	-1.6364	-4.2785
TraesCS4B01G206600	-1.5844	-1.5485
TraesCS4B01G209200	-0.82476	-1.207
TraesCS4B01G210600	1.1032	1.5748
TraesCS4B01G211600	-1.7837	-1.4046
TraesCS4B01G212400	2.0073	3.4957
TraesCS4B01G217000	-1.1481	-1.6063
TraesCS4B01G222700	0.39203	0.43901
TraesCS4B01G224500	-0.99932	-2.4291
TraesCS4B01G228400	-0.46031	-1.0047
TraesCS4B01G229300	0.71379	0.52926
TraesCS4B01G232900	-1.2661	-1.3719
TraesCS4B01G233400	0.4948	0.38087
TraesCS4B01G234600	-2.7628	-2.8974
TraesCS4B01G235100	-1.2018	-1.175
TraesCS4B01G240800	0.63969	0.81532
TraesCS4B01G242200	-0.50526	-2.3815
TraesCS4B01G243900	0.85387	0.8977
TraesCS4B01G245500	-0.86238	-1.4939
TraesCS4B01G251600	0.84761	1.2119
TraesCS4B01G259500	0.58211	0.4462
TraesCS4B01G260200	0.67303	0.91875
TraesCS4B01G262900	-5.305	-7.2752
TraesCS4B01G272000	0.80702	1.2009
TraesCS4B01G275000	0.74338	0.73055
TraesCS4B01G275400	1.0826	1.23
TraesCS4B01G276100	2.1589	2.7428
TraesCS4B01G278100	-1.4647	-1.3212
TraesCS4B01G281200	-3.8648	-2.3484
TraesCS4B01G281400	0.40861	0.33116
TraesCS4B01G287400	-4.7526	-2.9936
TraesCS4B01G288200	-0.83345	-1.5221
TraesCS4B01G297500	-4.173	-3.7052
TraesCS4B01G299100	-0.81649	-1.2381
TraesCS4B01G302500	0.8292	1.0971
TraesCS4B01G304300	0.79306	1.1362
TraesCS4B01G306400	0.88903	1.3096
TraesCS4B01G311100	0.57246	0.61132
TraesCS4B01G312300	1.9041	1.8849
TraesCS4B01G317800	-1.8429	-1.9105
TraesCS4B01G319100	0.59094	0.7672
TraesCS4B01G324000	-2.2323	-2.7206
TraesCS4B01G326400	-1.3386	-1.341
TraesCS4B01G339500	-0.65122	-0.94741
TraesCS4B01G341600	2.0387	2.3004
TraesCS4B01G344600	-1.0895	-1.632
TraesCS4B01G346100	1.546	2.1992
TraesCS4B01G348600	-1.5067	-6.4968
TraesCS4B01G359300	1.5334	1.6556
TraesCS4B01G364200	0.5732	0.57529
TraesCS4B01G364800	-0.48487	-0.52951
TraesCS4B01G364900	-2.399	-2.5601
TraesCS4B01G371900	-0.81697	-1.3024
TraesCS4B01G375100	0.40394	0.43892
TraesCS4B01G380400	-1.2561	-1.0442
TraesCS4B01G395800	0.60023	1.1209
TraesCS4B01G395900	0.6844	0.72213
TraesCS4D01G000500	0.8046	0.63214
TraesCS4D01G001600	-2.5232	-4.2495
TraesCS4D01G003600	-1.3645	-1.4264
TraesCS4D01G007900	-1.79	-3.3966
TraesCS4D01G013100	-3.5529	-3.7825
TraesCS4D01G013900	-3.0298	-2.3578
TraesCS4D01G014400	0.53474	0.71687
TraesCS4D01G020200	0.92769	1.4451
TraesCS4D01G022400	-1.9916	-2.2344
TraesCS4D01G025300	-1.3017	-2.1899
TraesCS4D01G032800	-2.3355	-4.1661
TraesCS4D01G034600	-0.79382	-1.7951
TraesCS4D01G036200	0.47263	1.2122
TraesCS4D01G041700	-1.9459	-3.2808
TraesCS4D01G044800	3.0712	3.0868
TraesCS4D01G045200	-1.1213	-2.1208
TraesCS4D01G050300	#NAME?	#NAME?
TraesCS4D01G051200	-3.0967	-4.0535
TraesCS4D01G054300	1.2136	1.2863
TraesCS4D01G056300	0.76397	0.91892
TraesCS4D01G057600	1.3086	1.1876
TraesCS4D01G065700	-1.8323	-4.1254
TraesCS4D01G067300	-2.2	-2.1396
TraesCS4D01G068100	-1.0848	-2.3094
TraesCS4D01G069200	3.0618	2.7369
TraesCS4D01G070700	0.50327	0.55887
TraesCS4D01G072800	-2.6747	-1.8599
TraesCS4D01G076000	-1.2699	-1.9237
TraesCS4D01G083400	1.4133	2.2498
TraesCS4D01G091300	0.54027	0.88712
TraesCS4D01G095400	0.63434	1.1573
TraesCS4D01G098500	0.48835	0.69729
TraesCS4D01G102300	0.57729	0.76615
TraesCS4D01G102700	0.88237	1.4008
TraesCS4D01G104900	0.53443	1.0452
TraesCS4D01G108200	0.40785	0.45703
TraesCS4D01G109500	-1.1112	-1.4387
TraesCS4D01G115500	#NAME?	-5.3018
TraesCS4D01G119600	-1.2912	-1.2644
TraesCS4D01G119900	1.0411	2.6652
TraesCS4D01G120600	0.95103	1.2256
TraesCS4D01G123000	-1.6156	-1.2768
TraesCS4D01G126200	0.71823	0.97589
TraesCS4D01G128700	0.73898	1.3288
TraesCS4D01G131600	0.47905	0.47501
TraesCS4D01G132500	0.82829	1.3351
TraesCS4D01G132800	-2.8146	-3.5558
TraesCS4D01G145100	0.38025	0.40961
TraesCS4D01G146700	-1.9945	-1.9778
TraesCS4D01G147300	4.7443	4.6004
TraesCS4D01G147700	0.5014	0.73403
TraesCS4D01G148300	-1.1831	-1.8118
TraesCS4D01G154400	-1.1854	-1.9192
TraesCS4D01G157300	-0.5526	-0.82718
TraesCS4D01G164500	#NAME?	#NAME?
TraesCS4D01G166200	-1.9636	-1.8193
TraesCS4D01G166300	0.91447	1.115
TraesCS4D01G166400	0.52072	0.36958
TraesCS4D01G169100	-0.90231	-0.91145
TraesCS4D01G171900	-2.8695	-2.6247
TraesCS4D01G172600	0.86327	1.748
TraesCS4D01G175200	-1.6886	-3.0024
TraesCS4D01G177000	0.37215	0.55257
TraesCS4D01G178700	0.66922	0.82401
TraesCS4D01G181400	-0.87478	-2.3425
TraesCS4D01G183600	-3.3039	-3.6544
TraesCS4D01G184800	-1.6258	-1.4993
TraesCS4D01G185100	0.86454	1.5791
TraesCS4D01G186700	-0.52984	-1.3164
TraesCS4D01G189300	-0.97968	-1.6161
TraesCS4D01G193200	-3.3707	-3.2099
TraesCS4D01G194900	2.0955	1.9755
TraesCS4D01G197100	-0.43108	-0.71
TraesCS4D01G197500	1.0701	3.2944
TraesCS4D01G199700	-1.5828	-1.424
TraesCS4D01G203800	2.9585	-2.6521
TraesCS4D01G204000	-2.2901	-3.445
TraesCS4D01G207700	0.84788	0.53074
TraesCS4D01G211300	1.1346	1.5789
TraesCS4D01G211700	-2.9824	-2.0684
TraesCS4D01G213400	1.6384	2.982
TraesCS4D01G214000	0.64355	0.70046
TraesCS4D01G214400	1.092	1.9355
TraesCS4D01G217300	-0.95041	-2.4233
TraesCS4D01G217400	-1.6397	-0.97491
TraesCS4D01G218100	0.61849	0.63573
TraesCS4D01G221900	Inf	Inf
TraesCS4D01G222500	1.3793	2.3439
TraesCS4D01G222900	-2.1106	-2.5544
TraesCS4D01G223300	0.52235	0.43161
TraesCS4D01G228100	0.48826	0.47756
TraesCS4D01G229200	1.286	1.8594
TraesCS4D01G232700	0.87227	0.46557
TraesCS4D01G234300	-0.42654	-0.89492
TraesCS4D01G234500	0.45065	0.44762
TraesCS4D01G240600	0.81095	1.1691
TraesCS4D01G242200	#NAME?	-5.138
TraesCS4D01G245000	1.0876	1.4695
TraesCS4D01G246600	1.0892	0.84438
TraesCS4D01G247500	0.4295	0.43098
TraesCS4D01G250400	-1.2109	-1.6613
TraesCS4D01G254000	-2.8596	-3.0838
TraesCS4D01G254100	0.76404	0.65634
TraesCS4D01G256800	-1.468	-1.6529
TraesCS4D01G264300	-0.79433	-1.461
TraesCS4D01G266700	-0.95702	-1.7958
TraesCS4D01G267000	0.71734	0.87294
TraesCS4D01G272100	-5.6076	-3.8961
TraesCS4D01G272400	1.2337	1.3468
TraesCS4D01G277000	-3.7819	-2.4982
TraesCS4D01G277400	-0.60754	-0.80824
TraesCS4D01G279900	-2.5433	-5.607
TraesCS4D01G280500	-2.3346	-2.5625
TraesCS4D01G282600	0.83758	0.56807
TraesCS4D01G286700	1.1559	1.7564
TraesCS4D01G287000	-0.81635	-1.1653
TraesCS4D01G290600	#NAME?	-3.9356
TraesCS4D01G296400	-4.3703	-3.1916
TraesCS4D01G298100	-0.65536	-0.70764
TraesCS4D01G300200	-1.3896	-2.009
TraesCS4D01G301000	0.84275	1.2711
TraesCS4D01G301800	-4.4394	-2.1293
TraesCS4D01G315600	0.60468	0.77349
TraesCS4D01G320900	-3.0845	-2.3485
TraesCS4D01G325700	-2.2715	1.5111
TraesCS4D01G328000	-0.63925	-1.0762
TraesCS4D01G331300	0.76085	1.1005
TraesCS4D01G335700	-0.46392	-1.2703
TraesCS4D01G336400	-0.91363	-1.9861
TraesCS4D01G337500	#NAME?	#NAME?
TraesCS4D01G343400	-0.66349	-1.1463
TraesCS4D01G346600	0.59619	0.66278
TraesCS4D01G348300	-0.76896	-1.2714
TraesCS4D01G359000	-1.255	-2.9372
TraesCS4D01G363400	-1.2533	-2.1225
TraesCS4D01G365600	-0.52616	-0.78333
TraesCS5A01G000600	0.52031	0.61358
TraesCS5A01G010200	0.74603	0.80814
TraesCS5A01G014600	0.73125	0.86644
TraesCS5A01G023600	2.3982	3.317
TraesCS5A01G024400	1.1571	3.0617
TraesCS5A01G027200	0.95274	0.77857
TraesCS5A01G030400	-0.85176	-0.82933
TraesCS5A01G040600	-0.7084	-1.3701
TraesCS5A01G043200	-3.8114	-3.6575
TraesCS5A01G044600	-2.0861	-1.8098
TraesCS5A01G046100	0.39517	0.64344
TraesCS5A01G051800	0.56674	0.66035
TraesCS5A01G054500	-0.95941	-1.4039
TraesCS5A01G058100	0.39896	0.58778
TraesCS5A01G059600	0.79923	0.92187
TraesCS5A01G061000	0.56903	0.72789
TraesCS5A01G063200	0.60507	0.74586
TraesCS5A01G064300	4.0425	5.3246
TraesCS5A01G064400	0.86039	0.62937
TraesCS5A01G071800	0.60804	1.4252
TraesCS5A01G082300	-1.5072	-1.3611
TraesCS5A01G085800	0.48904	0.50625
TraesCS5A01G085900	1.0107	1.2215
TraesCS5A01G087200	-5.0676	-3.463
TraesCS5A01G087700	-0.52135	-0.52368
TraesCS5A01G088100	0.56307	0.55741
TraesCS5A01G091800	0.58378	0.69335
TraesCS5A01G093200	-0.83743	-1.3274
TraesCS5A01G094300	0.48164	0.60437
TraesCS5A01G097100	0.8234	0.82679
TraesCS5A01G099700	#NAME?	#NAME?
TraesCS5A01G099800	0.91872	0.79837
TraesCS5A01G101900	-0.79506	-1.8974
TraesCS5A01G105100	#NAME?	#NAME?
TraesCS5A01G106400	0.87822	1.025
TraesCS5A01G108000	-3.1875	-3.077
TraesCS5A01G110300	-1.1696	-1.7432
TraesCS5A01G112900	0.78013	0.69798
TraesCS5A01G118300	-0.84027	-1.1996
TraesCS5A01G118600	0.3269	0.41124
TraesCS5A01G119600	-0.86552	-0.74279
TraesCS5A01G121600	0.76535	0.82702
TraesCS5A01G122200	-1.2392	-2.1754
TraesCS5A01G122900	0.51588	0.58744
TraesCS5A01G126000	-2.0568	-1.5769
TraesCS5A01G126100	1.3843	1.951
TraesCS5A01G126900	1.603	2.8233
TraesCS5A01G129500	2.677	3.4238
TraesCS5A01G136100	1.0624	1.444
TraesCS5A01G136200	0.69225	0.53898
TraesCS5A01G137800	-0.93899	-1.4269
TraesCS5A01G138100	-1.3141	-1.902
TraesCS5A01G138200	-1.7816	-1.5822
TraesCS5A01G140600	-0.84827	-0.81221
TraesCS5A01G140800	-2.2077	-2.71
TraesCS5A01G149200	0.41316	0.46056
TraesCS5A01G153500	0.40301	0.33289
TraesCS5A01G155500	-2.8159	-2.0382
TraesCS5A01G156500	0.71978	1.1217
TraesCS5A01G159100	-0.81544	-1.2526
TraesCS5A01G160900	-0.73522	-1.2946
TraesCS5A01G166200	1.1902	1.1199
TraesCS5A01G169000	0.58496	0.65405
TraesCS5A01G169600	0.42569	0.99411
TraesCS5A01G170000	0.3954	0.87813
TraesCS5A01G171800	0.82336	1.0088
TraesCS5A01G173300	0.84848	1.1257
TraesCS5A01G175200	-1.8763	-4.5869
TraesCS5A01G175600	0.6782	0.69516
TraesCS5A01G176000	0.97934	1.4692
TraesCS5A01G185400	#NAME?	-5.3463
TraesCS5A01G188700	1.1295	1.205
TraesCS5A01G190000	-1.57	-1.8654
TraesCS5A01G193200	1.2575	1.0649
TraesCS5A01G193500	1.0416	0.58301
TraesCS5A01G203800	-1.6659	-1.9755
TraesCS5A01G204600	1.1593	0.9374
TraesCS5A01G205000	0.54267	0.68224
TraesCS5A01G214000	-2.6614	-2.6303
TraesCS5A01G215900	-0.72083	-0.91652
TraesCS5A01G218100	-3.8972	-2.8227
TraesCS5A01G221100	-1.8001	-1.8465
TraesCS5A01G232000	-0.84308	-0.83807
TraesCS5A01G234300	-1.367	-1.7115
TraesCS5A01G235800	-1.3955	-3.1028
TraesCS5A01G238800	-2.3054	-3.0236
TraesCS5A01G242100	-1.5919	-1.8185
TraesCS5A01G258200	-3.0171	-2.3838
TraesCS5A01G265700	0.76595	0.95224
TraesCS5A01G267800	1.7815	2.2226
TraesCS5A01G272400	-1.153	-1.0518
TraesCS5A01G276000	-1.1151	-1.6223
TraesCS5A01G276500	3.5306	3.6824
TraesCS5A01G276800	-0.94081	-1.3258
TraesCS5A01G279400	-0.62854	-1.0043
TraesCS5A01G286900	Inf	Inf
TraesCS5A01G288400	-0.60775	-1.1421
TraesCS5A01G289300	0.56843	0.67884
TraesCS5A01G292400	0.61001	0.83188
TraesCS5A01G296400	0.53703	0.78499
TraesCS5A01G301800	0.83699	0.94953
TraesCS5A01G316500	1.1302	1.2085
TraesCS5A01G319900	0.7906	1.0704
TraesCS5A01G321400	2.0247	2.3765
TraesCS5A01G323500	-0.93754	-0.86926
TraesCS5A01G324300	2.6507	2.576
TraesCS5A01G330400	0.44838	0.41751
TraesCS5A01G330900	-4.4798	#NAME?
TraesCS5A01G331500	-1.451	-2.0945
TraesCS5A01G335700	#NAME?	#NAME?
TraesCS5A01G338700	-4.2603	-3.9118
TraesCS5A01G340400	0.81272	1.206
TraesCS5A01G348100	#NAME?	#NAME?
TraesCS5A01G357200	-0.7444	-1.2872
TraesCS5A01G357300	0.87883	2.1968
TraesCS5A01G360200	0.45956	0.64633
TraesCS5A01G360900	-0.88595	-1.4436
TraesCS5A01G363500	2.5907	3.4299
TraesCS5A01G364900	0.4447	0.41783
TraesCS5A01G366700	0.78854	0.75991
TraesCS5A01G366900	1.1918	1.8044
TraesCS5A01G370100	-0.72482	-1.1539
TraesCS5A01G371800	1.279	2.1433
TraesCS5A01G376700	1.0087	1.3696
TraesCS5A01G380900	1.7548	1.9593
TraesCS5A01G383000	0.66838	0.51953
TraesCS5A01G383300	1.213	1.8396
TraesCS5A01G389800	-0.97003	-0.8322
TraesCS5A01G390300	0.53858	0.66203
TraesCS5A01G390700	1.0472	0.70351
TraesCS5A01G392300	1.4872	1.7407
TraesCS5A01G401600	0.52895	0.56
TraesCS5A01G403000	-1.9402	-3.1428
TraesCS5A01G407700	-1.21	-3.0209
TraesCS5A01G408000	-2.8326	-3.677
TraesCS5A01G408400	0.84988	0.44434
TraesCS5A01G408500	-1.104	-1.2742
TraesCS5A01G411200	0.67791	0.87993
TraesCS5A01G417000	-2.242	-2.8867
TraesCS5A01G424400	-1.2319	-2.8138
TraesCS5A01G426400	0.72112	0.77515
TraesCS5A01G428700	-1.3491	-1.262
TraesCS5A01G431200	-0.52278	-0.74864
TraesCS5A01G434400	0.83008	1.1203
TraesCS5A01G439300	-1.0177	-1.4041
TraesCS5A01G441100	5.771	5.3745
TraesCS5A01G448100	-0.95991	-1.223
TraesCS5A01G456000	-0.56306	-0.81582
TraesCS5A01G460800	2.8063	3.2769
TraesCS5A01G461400	1.1908	1.0229
TraesCS5A01G463400	2.0694	2.9083
TraesCS5A01G466800	-1.5224	-2.3205
TraesCS5A01G472300	4.1249	4.446
TraesCS5A01G475200	#NAME?	-4.7484
TraesCS5A01G480500	0.74227	0.63777
TraesCS5A01G483400	-1.5913	-1.4709
TraesCS5A01G487100	-4.7375	-5.6984
TraesCS5A01G489800	-0.69724	-0.80332
TraesCS5A01G494200	1.3257	1.7401
TraesCS5A01G497800	0.6795	0.85525
TraesCS5A01G501700	-0.99807	-1.5749
TraesCS5A01G502500	-1.3252	-2.3708
TraesCS5A01G509200	-0.68975	-1.6605
TraesCS5A01G510900	-2.4159	-3.3836
TraesCS5A01G513900	#NAME?	-4.7566
TraesCS5A01G514700	-1.9782	-1.8905
TraesCS5A01G518800	-4.9737	-3.1662
TraesCS5A01G521200	1.0284	1.3089
TraesCS5A01G522600	1.0142	1.4402
TraesCS5A01G524800	#NAME?	#NAME?
TraesCS5A01G525000	0.53065	0.91104
TraesCS5A01G530000	0.9429	0.9483
TraesCS5A01G532500	0.41453	0.40759
TraesCS5A01G542400	-1.0636	-0.73922
TraesCS5A01G545800	#NAME?	-5.0532
TraesCS5A01G554200	Inf	Inf
TraesCS5A01G556500	1.0188	1.1951
TraesCS5A01G557100	-2.1997	-2.7804
TraesCS5A01G557400	0.75765	1.0553
TraesCS5B01G013100	-1.9319	-2.2578
TraesCS5B01G013900	0.47979	0.4717
TraesCS5B01G026400	1.5359	1.0986
TraesCS5B01G055400	-1.4114	-1.4574
TraesCS5B01G057800	0.56301	0.67186
TraesCS5B01G058500	-2.847	-3.0385
TraesCS5B01G066700	1.1054	0.88619
TraesCS5B01G069000	-0.98718	-2.0227
TraesCS5B01G069500	4.4628	4.0356
TraesCS5B01G070000	0.87613	0.88249
TraesCS5B01G076600	-2.3415	-3.4191
TraesCS5B01G080300	0.91542	1.328
TraesCS5B01G080400	1.7002	1.89
TraesCS5B01G082500	1.4058	1.5329
TraesCS5B01G084700	0.97494	0.85007
TraesCS5B01G087500	0.72716	0.83858
TraesCS5B01G091600	0.58269	0.83515
TraesCS5B01G091700	0.78113	0.895
TraesCS5B01G093200	0.66611	0.76097
TraesCS5B01G094300	-0.50858	-0.56035
TraesCS5B01G094600	#NAME?	-4.9596
TraesCS5B01G108900	0.9497	1.0856
TraesCS5B01G109100	0.46252	0.65957
TraesCS5B01G111200	-0.35266	-0.78026
[truncated: 1,202 more rows]

## Sheet: Table S4 DAM RR
Supplemental Table 4 A total of 81 species of specific metabolites in "CK_vs_R40" and "CK_vs_R64"
Index	Compounds	Class	CK_vs_S52	CK_vs_S66	CK_vs_R40	CK_vs_R64	CK-1	CK-2	CK-3	S52-1	S52-2	S52-3	S66-1	S66-2	S66-3	R40-1	R40-2	R40-3	R64-1	R64-2	R64-3
Tri11	Histamine	Amino acid derivatives	-	-	+	+	2480000	2160000	2340000	855000	1010000	1170000	851000	799000	842000	211000	216000	194000	300000	234000	219000
Tri16	4-(Aminomethyl)-5-(hydroxymethyl)-2-methylpyridin-3-ol	Others	-	-	+	-	2670000	2460000	2350000	1880000	2090000	2180000	1350000	1530000	1350000	603000	531000	589000	946000	823000	862000
Tri66	β-Nicotinamide mononucleotide	Nucleotide and its derivates	-	-	+	-	69200	71500	105000	392000	256000	185000	284000	242000	309000	474000	503000	260000	170000	168000	217000
Tri74	iP7G	Nucleotide and its derivates	-	-	+	-	959000	698000	856000	429000	329000	377000	329000	310000	304000	4540000	3990000	3410000	1360000	1360000	1430000
Tri167	N-hydroxy tryptamine	Tryptamine derivatives	-	-	+	+	59000000	56600000	53000000	217000000	227000000	246000000	186000000	196000000	183000000	483000000	494000000	495000000	535000000	492000000	511000000
Tri170	5-Hydroxy-L-tryptophan	Amino acid derivatives	-	-	+	+	4300000	4430000	4560000	1660000	2060000	1970000	3890000	4290000	3990000	993000	957000	1010000	895000	823000	916000
Tri171	serotonin	Tryptamine derivatives	-	-	+	+	70900000	68600000	65800000	228000000	260000000	291000000	217000000	218000000	217000000	526000000	518000000	529000000	540000000	524000000	521000000
Tri176	Kinetin 9-riboside	Phytohormones	-	-	+	+	8890000	9990000	10200000	6400000	5290000	4580000	7190000	10000000	8080000	2270000	2400000	2110000	2450000	2430000	2530000
Tri196	L-Kynurenine	Amino acid derivatives	-	-	-	+	2940000	2790000	2750000	2790000	3230000	3110000	4060000	4490000	4270000	966000	877000	896000	752000	766000	725000
Tri200	Nicotinic acid-hexoside	Nicotinic acid derivatives	-	-	+	-	3360000	3170000	3080000	1770000	2140000	2270000	7780000	8250000	7400000	13700000	12600000	12800000	8190000	7850000	7990000
Tri202	N'-Formylkynurenine	Amino acid derivatives	-	-	-	+	3700000	3250000	3210000	3430000	3680000	3480000	5120000	5900000	5520000	1210000	1170000	1170000	923000	852000	825000
Tri203	Thymidine	Nucleotide and its derivates	-	-	+	+	525000	454000	531000	2060000	1830000	1760000	1820000	2360000	1810000	2840000	2590000	2830000	1890000	1800000	1850000
Tri220	Pantothenol	Alcohols and polyols	-	-	+	+	144000	201000	428000	108000	99200	108000	26300	51000	132000	53100	54400	44800	53300	35800	45800
Tri234	10-Formyl-THF	Others	-	-	+	+	41000000	40200000	40800000	13000000	8830000	9030000	17900000	17600000	16500000	7740000	7910000	7460000	10100000	10600000	10900000
Tri245	Indole	Indole derivatives	-	-	+	+	188000000	176000000	179000000	52400000	55800000	60700000	129000000	130000000	131000000	34200000	31900000	32900000	29000000	30100000	29600000
Tri247	Methoxyindoleacetic acid	Indole derivatives	-	-	+	+	231000000	234000000	229000000	66900000	65200000	71100000	141000000	152000000	142000000	36500000	37100000	35900000	40600000	37100000	39000000
Tri261	Luteolin 6-C-hexoside 8-C-hexosyl-O-hexoside	Flavone C-glycosides	-	-	+	+	9	53800	80000	54900	47400	9	17500	9	13100	613000	532000	637000	305000	263000	305000
Tri300	Coumaroyl choline	Cholines	-	-	+	+	7020000	5990000	6370000	13600000	16400000	17300000	16000000	15200000	16100000	52600000	48600000	53600000	25700000	25100000	24300000
Tri314	N-Sinapoyl agmatine	Phenolamides	-	-	+	-	34300000	29400000	33800000	9860000	12600000	15800000	9450000	8410000	8440000	5660000	5330000	5580000	13700000	13900000	14300000
Tri364	Syringetin 3-O-hexoside	Flavonol	-	-	+	+	4620000	4940000	5210000	2360000	2210000	2430000	3470000	3400000	3450000	1150000	1090000	1100000	1160000	1190000	1140000
Tri381	Limocitrin O-hexoside	Flavone	-	-	+	+	5210000	4780000	5170000	2460000	2390000	2390000	3880000	3760000	3700000	1160000	1120000	1120000	1200000	1180000	1230000
Tri421	Nicotinic Acid Methyl Ester (Methyl Nicotinate)	Vitamins	-	-	+	+	630000	587000	620000	487000	560000	604000	1310000	1310000	1230000	11400000	10100000	11700000	4710000	4420000	4320000
Tri457	methylQuercetin O-hexoside	Flavonol	-	-	-	+	122000	104000	151000	106000	124000	156000	98400	97700	91300	376000	239000	316000	419000	447000	512000
Tri458	O-Feruloyl 4-hydroxylcoumarin	Coumarins	-	-	+	+	5710000	5130000	5830000	19200000	19600000	20300000	6660000	6440000	7100000	26100000	25600000	24200000	21500000	20500000	22700000
Tri462	6-C-hexosyl-apigenin O-feruloylhexoside	Flavone C-glycosides	-	-	+	+	1020000	1140000	1150000	2300000	2710000	2940000	511000	401000	308000	4670000	4750000	5550000	6050000	5520000	5230000
Tri467	C-hexosyl-apigenin O-p-coumaroylhexoside	Flavone C-glycosides	-	-	+	+	358000	362000	418000	766000	807000	770000	214000	149000	204000	1570000	1680000	1880000	2130000	1900000	1940000
Tri487	Ferulic acid	Hydroxycinnamoyl derivatives	-	-	-	+	556000	573000	575000	1320000	1310000	1400000	1630000	1690000	1530000	1760000	1700000	1880000	2160000	2210000	2000000
Tri495	Hesperetin 7-O-neohesperidoside (Neohesperidin)	Flavanone	-	-	-	+	119000	159000	121000	251000	374000	384000	215000	229000	225000	419000	406000	567000	583000	500000	465000
Tri534	C-hexosyl-luteolin O-sinapic acid	Flavone C-glycosides	-	-	+	+	1090000	1160000	1110000	1990000	2120000	2070000	1130000	1020000	984000	6120000	5950000	7380000	6030000	5690000	6220000
Tri563	Luteolin O-sinapoylhexoside	Flavone	-	-	+	+	1740000	1460000	1700000	2680000	2860000	3020000	1680000	1630000	1630000	8880000	8770000	10600000	8300000	8470000	8340000
Tri579	2'-Hydroxygenistein	Isoflavone	-	-	-	+	46700	107000	99000	181000	178000	139000	204000	133000	172000	192000	267000	381000	308000	286000	387000
Tri598	Luteolin	Flavone	-	-	-	+	63300	125000	108000	198000	196000	148000	229000	153000	217000	206000	260000	439000	364000	346000	411000
Tri691	Azoxystrobin acid	Others	-	-	-	+	8230000	8380000	6540000	8000000	6050000	1980000	7660000	2410000	8960000	5980000	9240000	5910000	1420000	1340000	3450000
Tri721	MAG (18:4) isomer3	Lipids_Glycerolipids	-	-	+	+	311000	363000	306000	1090000	1370000	1360000	980000	1070000	965000	2060000	1730000	1910000	1350000	1150000	1110000
Tri724	DGMG (18:2) isomer1	Lipids_Glycerolipids	-	-	+	-	3070000	3460000	3240000	5060000	4380000	5430000	7440000	6440000	5860000	17900000	20400000	20600000	11000000	9880000	10700000
Tri730	DGMG (18:2) isomer3	Lipids_Glycerolipids	-	-	+	+	482000	439000	382000	427000	388000	470000	860000	712000	760000	4850000	5230000	6200000	2400000	2690000	2480000
Tri740	MAG (18:3) isomer3	Lipids_Glycerolipids	-	-	+	+	39000000	35600000	35400000	65100000	65500000	80700000	44000000	41100000	39100000	221000000	197000000	220000000	164000000	148000000	145000000
Tri743	MAG (18:1) isomer1	Lipids_Glycerolipids	-	-	+	+	249000	266000	265000	655000	560000	668000	893000	871000	789000	4310000	4340000	4550000	2450000	2020000	2190000
Tri747	MAG (18:1) isomer2	Lipids_Glycerolipids	-	-	+	+	244000	263000	230000	630000	543000	658000	932000	869000	806000	4170000	4210000	4240000	2340000	2090000	1990000
Tri750	LysoPC 18:0 (2n isomer)	Lipids_Glycerophospholipids	-	-	+	+	2240000	2160000	2130000	7810000	7880000	8820000	4840000	5080000	4480000	19200000	19000000	17700000	12500000	11500000	11300000
Tri752	LysoPC 20:4	Lipids_Glycerophospholipids	-	-	+	+	25500000	23900000	23100000	66700000	61700000	68800000	42200000	40200000	40200000	144000000	143000000	143000000	119000000	104000000	98900000
Tri756	MGMG (18:2) isomer2	Lipids_Glycerolipids	-	-	+	-	3920000	3130000	3060000	5330000	4800000	6170000	3230000	2850000	3000000	13300000	13900000	14000000	12800000	11700000	11700000
Tri758	MGMG (18:2) isomer1	Lipids_Glycerolipids	-	-	+	+	1700000	1510000	1540000	1650000	1670000	2430000	1480000	1250000	1330000	19700000	18800000	21200000	13000000	11500000	11500000
Tri760	PC 16:1/14:1	Lipids_Glycerophospholipids	-	-	+	-	3120000	2370000	2360000	2010000	3510000	3690000	5060000	5160000	4880000	1160000	9	1210000	1830000	1630000	1880000
Tri766	LysoPC 20:1 (2n isomer)	Lipids_Glycerophospholipids	-	-	+	+	334000	321000	312000	1380000	1230000	1390000	1160000	1010000	1090000	3020000	2820000	3380000	1860000	1460000	1560000
Tri771	MAG (18:2)	Lipids_Glycerolipids	-	-	+	+	6050000	6290000	6410000	10800000	13400000	14000000	11400000	9900000	10400000	41800000	30500000	39300000	34600000	28700000	26900000
Tri786	trans,trans-Muconic acid	Organic acids	-	-	+	-	1410000	1480000	1400000	2280000	2320000	2140000	2530000	2370000	2560000	8380000	8500000	8600000	2690000	2800000	2720000
Tri792	L-(+)-Arginine	Amino acids	-	-	+	-	8240000	8840000	8640000	15200000	14300000	14500000	4580000	4540000	4450000	2080000	2180000	2240000	6320000	6680000	6890000
Tri802	L-Glutamine O-hexside	Amino acid derivatives	-	-	+	-	713000	655000	666000	167000	165000	335000	411000	467000	452000	167000	149000	165000	268000	323000	326000
Tri946	O-p-coumaroyl-O-salicyloyl quinic acid	Quinate and its derivatives	-	-	+	+	19100	14800	20600	8880	14200	10300	12900	16500	19800	9	9	9	9	9	9
Tri982	4-Oxopentanoate	Organic acids	-	-	+	-	32400	30500	28900	85600	86800	87000	93600	96900	104000	213000	186000	182000	106000	105000	114000
Tri993	2–furanoic acid	Organic acids	-	-	+	+	3980000	3410000	3230000	707000	905000	1020000	2220000	1950000	2130000	455000	401000	387000	522000	479000	457000
Tri995	5-O-p-coumaroyl quinic acid O-hexoside	Quinate and its derivatives	-	-	+	+	33900	23900	31600	52400	69700	71500	107000	100000	100000	220000	207000	196000	167000	168000	153000
Tri1004	Hesperetin O-hexosyl-O-hexoside	Flavanone	-	-	-	+	60700	58600	72600	65200	68200	68400	80300	80700	83500	50200	47700	50900	40700	43900	9
Tri1020	L-Tryptophan	Amino acids	-	-	+	+	356000000	345000000	339000000	119000000	130000000	138000000	222000000	233000000	228000000	70700000	67000000	70100000	74400000	73200000	71700000
Tri1028	Luteolin O-hexosyl-O-hexosyl-O-hexoside	Flavone	-	-	+	+	25400	28400	9	32500	37500	37800	9	12700	9	307000	312000	351000	183000	181000	198000
Tri1032	Acacetin O-acetyl hexoside	Flavone	-	-	+	+	47600	50200	67700	108000	133000	121000	99100	95200	90800	268000	243000	289000	212000	234000	223000
Tri1033	Benzoylformic acid	Organic acids	-	-	+	-	96100	96900	102000	102000	120000	108000	171000	161000	181000	804000	786000	791000	319000	311000	299000
Tri1048	Coniferin	Hydroxycinnamoyl derivatives	-	-	+	+	748000	784000	1170000	315000	176000	342000	529000	309000	364000	4210000	3740000	4240000	3200000	3150000	3510000
Tri1055	1-O-p-Coumaroyl quinic acid	Quinate and its derivatives	-	-	-	+	107000	81100	89400	74600	50400	55500	114000	191000	168000	321000	358000	292000	292000	418000	364000
Tri1087	5-O-p-Coumaroylquinic acid	Quinate and its derivatives	-	-	+	+	30300	37700	29400	40700	43800	53800	47000	41900	45300	198000	218000	190000	142000	159000	134000
Tri1091	Epigallate catechin gallate (EGCG)	Catechin derivatives	-	-	+	-	9	9	9	9	9	9	9	9	9	9	2860000	9	9	9	9
Tri1100	O-p-Coumaroyl quinic acid O-rutinoside derivative	Quinate and its derivatives	-	-	+	-	212000	147000	205000	43500	73000	126000	117000	145000	131000	62300	9	63100	72200	83000	80300
Tri1110	p-Coumaryl alcohol	Hydroxycinnamoyl derivatives	-	-	+	+	253000	240000	241000	323000	364000	371000	476000	473000	470000	10800000	11400000	11700000	6910000	6710000	6620000
Tri1122	Chlorogenic acid methyl ester	Quinate and its derivatives	-	-	-	+	74300	85800	63200	86800	109000	144000	60600	59300	53000	273000	271000	285000	299000	292000	274000
Tri1142	Luteolin 7-O-glucoside (Cynaroside)	Flavone	-	-	+	+	211000	404000	193000	1140000	981000	1230000	215000	244000	242000	1330000	1640000	1490000	1160000	1100000	1160000
Tri1156	Coniferyl alcohol	Hydroxycinnamoyl derivatives	-	-	+	+	80500	88100	83700	76800	80900	88900	62200	58200	61700	762000	769000	739000	546000	535000	619000
Tri1174	Chrysoeriol 7-O-rutinoside	Flavone	-	-	-	+	962000	978000	883000	2430000	2320000	9	1150000	1050000	1080000	3680000	3480000	3570000	3370000	3460000	3480000
Tri1178	Apigenin 7-O-neohesperidoside (Rhoifolin)	Flavone	-	-	+	+	479000	506000	491000	1810000	1790000	9	703000	658000	719000	2830000	3050000	3050000	2600000	2670000	2670000
Tri1184	Chrysoeriol O-rhamnosyl-O-glucuronic acid	Flavone	-	-	+	+	9	9	27500	29600	38700	9	9	9	9	40300	47200	47000	59900	58600	56700
Tri1187	Dihydroquercetin (Taxifolin)	Flavonol	-	-	+	-	35500	43400	47200	49700	56300	54200	44900	40300	42300	9	9	14900	26500	15700	20600
Tri1208	7-hydroxycoumarin-beta-rhamnoside	Coumarins	-	-	+	-	124000	111000	120000	104000	87300	103000	101000	87200	73600	33600	9	32500	49700	50800	29400
Tri1210	4-Hydroxy-7-methoxycoumarin-beta-rhamnoside	Coumarins	-	-	+	+	67200	58500	58500	59100	78900	70100	77700	81900	80900	370000	382000	387000	302000	426000	404000
Tri1224	Formononetin 7-O-glucoside (Ononin)	Isoflavone	-	-	+	+	378000	322000	256000	69200	147000	146000	807000	531000	787000	63400	46800	36300	62900	49500	53500
Tri1242	Disinapoyl hexoside	Hydroxycinnamoyl derivatives	-	-	-	+	230000	233000	234000	554000	606000	9	486000	492000	517000	644000	681000	655000	864000	828000	832000
Tri1254	Gibberellin A20	Phytohormones	-	-	-	+	24300	24300	22500	11300	19200	25500	34700	28300	31200	12900	11400	14500	9760	5700	9
Tri1260	Acetyl-eriodictyol O-hexoside	Flavone	-	-	+	-	1220000	1050000	1110000	679000	900000	1140000	770000	670000	772000	294000	241000	263000	380000	360000	326000
Tri1268	Pinoresinol	Hydroxycinnamoyl derivatives	-	-	+	+	36800	36800	35500	32800	37000	45900	27100	22900	28600	172000	195000	190000	168000	156000	156000
Tri1271	3,4-Dimethoxycinnamic acid	Hydroxycinnamoyl derivatives	-	-	+	-	247000	222000	227000	365000	368000	339000	376000	372000	367000	1420000	1380000	1570000	838000	818000	783000
Tri1337	13-HOTrE(r)	Lipids_Fatty acids	-	-	-	+	1230000	1950000	4180000	858000	407000	377000	725000	356000	1590000	1630000	4150000	914000	301000	324000	846000
Tri1346	LysoPE 18:1 (2n isomer)	Lipids_Glycerophospholipids	-	-	+	+	4020000	4000000	4150000	16700000	15600000	19300000	15400000	15300000	14700000	37700000	36000000	35500000	22900000	21300000	19500000
"+" refers to significantly differentially accumulated metabolite comparing with CK treatment.

## Sheet: Table S5 DAM SS
Supplemental Table 5 A total of 81 species of specific metabolites in "CK_vs_S52" and "CK_vs_S66"
Index	Compounds	Class	CK_vs_S52	CK_vs_S66	CK_vs_R40	CK_vs_R64	CK-1	CK-2	CK-3	S52-1	S52-2	S52-3	S66-1	S66-2	S66-3	R40-1	R40-2	R40-3	R64-1	R64-2	R64-3
Tri2	Spermidine	Phenolamides	+	+	-	-	203000	82600	141000	1010000	2620000	3920000	1200000	1750000	1670000	112000	155000	170000	139000	201000	171000
Tri10	1,5-Diaminopentane	Phenolamides	+	-	-	-	161000	148000	143000	879000	1160000	1300000	327000	324000	337000	284000	271000	221000	245000	192000	198000
Tri12	Agmatine	Phenolamides	+	+	-	-	111000	129000	134000	4180000	4880000	5000000	547000	808000	632000	105000	120000	107000	252000	195000	220000
Tri15	Methionine sulfoxide	Amino acid derivatives	+	-	-	-	2460000	2230000	2370000	9	9	9	1760000	1540000	1620000	1000000	924000	1010000	1290000	1310000	1390000
Tri19	3-N-Methyl-L-histidine	Amino acid derivatives	-	+	-	-	190000	171000	164000	85700	85900	110000	11300	51200	47100	57000	43700	50200	103000	91100	85800
Tri23	L-Glutamine	Amino acids	-	+	-	-	91400000	86900000	86500000	85100000	90800000	87000000	22200000	22000000	22200000	23300000	22600000	23200000	54300000	49900000	49900000
Tri24	Diethanolamine	Others	+	-	-	-	73600	108000	143000	1230000	788000	596000	223000	164000	163000	294000	187000	133000	347000	262000	343000
Tri45	Lysine butyrate	Amino acid derivatives	-	+	-	-	262000000	275000000	276000000	199000000	208000000	227000000	40800000	38200000	35800000	74700000	65600000	72400000	244000000	206000000	235000000
Tri55	γ-aminobutyric acid	Organic acids	+	-	-	-	785000	884000	839000	3760000	4330000	4860000	3200000	2410000	2770000	2040000	1970000	2010000	1750000	1630000	1720000
Tri62	CYS-GLY	Amino acid derivatives	-	+	-	-	22200	28800	25800	20600	9350	12600	9	4550	10000	22200	7500	16500	31800	20400	22500
Tri63	Aspartic acid di-O-glucoside	Amino acid derivatives	+	+	-	-	7430000	8830000	9870000	616000	623000	644000	573000	430000	521000	5690000	5060000	4250000	3830000	4700000	5000000
Tri72	5-Aminovaleric acid	Amino acid derivatives	-	+	-	-	217000	182000	229000	716000	827000	950000	1150000	1180000	1130000	782000	638000	668000	303000	290000	352000
Tri120	3,4-Dihydroxy-DL-phenylalanine	Amino acid derivatives	+	+	-	-	687000	892000	930000	341000	9	9	283000	299000	9	316000	212000	233000	244000	204000	244000
Tri139	S-(methyl)glutathione	Amino acid derivatives	+	-	-	-	187000	183000	148000	810000	853000	616000	427000	485000	479000	450000	383000	427000	538000	521000	493000
Tri151	S-(5'-Adenosy)-L-homocysteine	Amino acid derivatives	-	+	-	-	2960000	2550000	2810000	8250000	9720000	9020000	14000000	13800000	13800000	10300000	9130000	9560000	5780000	6680000	6450000
Tri168	Thymine	Nucleotide and its derivates	+	+	-	-	2790000	2560000	2630000	11300000	12600000	11800000	11500000	11500000	12200000	5490000	5140000	5280000	2670000	3060000	2780000
Tri185	3-Methylxanthine	Nucleotide and its derivates	-	+	-	-	152000	166000	148000	78900	105000	101000	77300	88000	9	204000	173000	180000	204000	213000	222000
Tri211	2-(dimethylamino)guanosine	Nucleotide and its derivates	+	-	-	-	1120000	1110000	1040000	5540000	6480000	7100000	3520000	3260000	2980000	2710000	2480000	2860000	1970000	1730000	1750000
Tri216	N-p-Coumaroyl putrescine	Phenolamides	+	-	-	-	21400000	19100000	17600000	84500000	94500000	102000000	15000000	14700000	13400000	18900000	17300000	18800000	32700000	30500000	30500000
Tri217	N'-p-Coumaroyl putrescine	Phenolamides	+	-	-	-	21300000	19800000	17900000	83100000	88900000	96000000	16100000	16400000	14700000	21200000	20000000	20400000	33300000	31300000	32200000
Tri227	trans-Zeatin (tZ)	Phytohormones	+	-	-	-	61200	76500	71200	273000	300000	341000	163000	156000	154000	61800	50100	49700	51200	33800	41700
Tri283	Epigallocatechin (EGC)	Catechin derivatives	+	+	-	-	238000	180000	181000	39300	9	49000	9	40000	38700	159000	4100000	217000	108000	158000	186000
Tri292	N-Feruloyl spermidine	Phenolamides	-	+	-	-	23700000	22700000	22600000	14600000	16200000	16700000	3070000	3090000	3120000	12400000	11500000	12100000	47800000	47600000	48200000
Tri315	3-O-Feruloyl quinic acid	Quinate and its derivatives	+	-	-	-	52300000	52100000	51900000	6880000	6620000	6400000	14300000	16300000	17500000	17000000	17300000	16600000	23100000	24800000	23200000
Tri322	Anisic acid O-feruloyl hexoside	Others	-	+	-	-	123000	102000	96700	228000	201000	213000	77200	9	74800	494000	311000	360000	396000	315000	303000
Tri361	Biotin	Vitamins	+	-	-	-	190000	185000	242000	9	9	9	161000	197000	156000	217000	238000	261000	208000	238000	230000
Tri431	Phellodensin F	Others	-	+	-	-	944000	758000	839000	293000	283000	310000	115000	82900	90500	1220000	1100000	1070000	1630000	1660000	1590000
Tri440	5-Methoxy-N,N-dimethyltryptamine	Tryptamine derivatives	-	+	-	-	171000	154000	164000	112000	77800	113000	38500	33700	33600	274000	231000	251000	272000	306000	352000
Tri513	Tricin O-glucuronic acid	Flavone	+	-	-	-	357000	346000	375000	9	9	9	1380000	1170000	1030000	112000	116000	225000	164000	156000	162000
Tri520	Tricin 4'-O-(β-guaiacylglyceryl) ether-O-rutinoside	Flavonolignan	-	+	-	-	226000	262000	181000	79400	108000	82800	60800	29900	50200	102000	110000	119000	264000	272000	226000
Tri569	N-Acetyl tryptamine	Phenolamides	-	+	-	-	1410000	1210000	1320000	4830000	5830000	5940000	8110000	7660000	7940000	2410000	2060000	2250000	1870000	1790000	1650000
Tri573	3’,4’,5’-Tricetin O-rutinoside	Flavone	-	+	-	-	20900000	18700000	18500000	9950000	12100000	12700000	327000	374000	379000	12400000	10700000	11200000	30000000	28100000	26100000
Tri616	3-Indolepropionic acid	Indole derivatives	+	-	-	-	233000	204000	228000	9	9	9	56900	64500	62400	113000	107000	89800	122000	118000	99200
Tri632	Apigenin	Flavone	-	+	-	-	195000	283000	281000	840000	789000	758000	1740000	1440000	1570000	477000	601000	1060000	757000	687000	745000
Tri680	4-oxo-9Z,11Z,13E,15E-octadecatetraenoic acid	Lipids_Fatty acids	+	-	-	-	852000	716000	687000	3600000	4870000	4400000	2110000	2290000	1880000	1560000	1370000	1500000	1810000	1620000	1580000
Tri700	MAG (18:4) isomer2	Lipids_Glycerolipids	+	-	-	-	72000	69600	80600	381000	558000	592000	210000	219000	226000	221000	232000	272000	212000	181000	194000
Tri716	LysoPE 14:0	Lipids_Glycerophospholipids	+	+	-	-	234000	216000	211000	776000	1110000	1130000	2110000	2100000	2170000	606000	552000	686000	572000	567000	541000
Tri718	LysoPC 15:1	Lipids_Glycerophospholipids	+	+	-	-	177000	154000	173000	941000	1660000	1570000	758000	756000	770000	400000	448000	443000	555000	456000	500000
Tri754	LysoPE 18:0 (2n isomer)	Lipids_Glycerophospholipids	+	+	-	-	15000	11700	12700	44300	63600	71900	120000	109000	117000	35500	37200	51600	32400	26800	33500
Tri784	Guanidineacetic acid	Amino acid derivatives	+	-	-	-	32400	23900	27800	116000	126000	127000	76900	107000	73000	60100	56800	61800	60400	46700	48100
Tri796	L-Glutamic acid O-glucoside	Amino acid derivatives	+	-	-	-	604000	528000	683000	44200	43100	59500	147000	183000	177000	163000	165000	156000	200000	230000	237000
Tri807	D(+)-Melezitose O-rhamnoside	Carbohydrates	+	+	-	-	161000	162000	174000	9	9	9	9	47100	44400	482000	506000	487000	9	356000	351000
Tri808	Anthranilate O-hexosyl-O-hexoside	Benzoic acid derivatives	+	+	-	-	2860000	2700000	2680000	148000	162000	217000	155000	195000	166000	1880000	1870000	2150000	1700000	1930000	1630000
Tri811	trans-4-Hydroxy-L-proline	Amino acid derivatives	+	-	-	-	11200	5070	2700	32700	27600	23200	17100	13200	14700	3380	5190	3380	13000	8080	8690
Tri821	2-Aminoethanesulfinic acid	Organic acids	+	+	-	-	9	9370	8620	16900	16000	13200	32400	27000	24000	13700	13800	10800	8280	9	12000
Tri822	D(+)-Glucose	Carbohydrates	+	-	-	-	1710000	1750000	1820000	341000	358000	379000	998000	891000	893000	2690000	2640000	2700000	1800000	1950000	1980000
Tri833	H-HomoArg-OH	Amino acid derivatives	+	+	-	-	41000	48300	39100	336000	396000	499000	295000	274000	259000	116000	135000	118000	96700	112000	125000
Tri835	L-Cysteine	Amino acids	+	-	-	-	55900	53500	49200	269000	225000	325000	21800	18900	11100	50000	63000	34700	30300	32000	38100
Tri836	D-(+)-Sucrose	Carbohydrates	+	-	-	-	14600000	13500000	13700000	1660000	2230000	2300000	3990000	3790000	4080000	17800000	18300000	19000000	11900000	14200000	14000000
Tri840	D(+)-Melezitose	Carbohydrates	+	+	-	-	176000	154000	169000	3300	7000	9	28900	19900	35000	617000	637000	591000	347000	363000	391000
Tri881	A-Ketoglutaric acid	Organic acids	+	-	-	-	221000	166000	205000	849000	1270000	1160000	684000	656000	685000	462000	539000	428000	268000	326000	371000
Tri889	L-Pipecolic acid	Amino acid derivatives	+	-	-	-	163000	188000	165000	701000	802000	760000	534000	480000	487000	88400	104000	105000	176000	164000	200000
Tri902	N-Acetylaspartate	Amino acid derivatives	+	-	-	-	76200	73400	77400	350000	407000	451000	174000	151000	145000	62100	72300	47500	59200	53100	57700
Tri907	N-acetylglycine	Amino acid derivatives	+	+	-	-	30100	25700	21900	255000	353000	302000	103000	95600	115000	81300	58700	68900	59500	42700	57000
Tri908	β-Pseudouridine	Nucleotide and its derivates	+	-	-	-	30800	25500	30700	168000	207000	205000	64100	85500	93100	30500	42300	24600	32800	23000	36800
Tri910	N-Acetylthreonine	Amino acid derivatives	+	+	-	-	108000	106000	117000	943000	1060000	1290000	546000	573000	555000	268000	270000	249000	170000	187000	163000
Tri917	Uridine 5'-monophosphate	Nucleotide and its derivates	+	+	-	-	287000	268000	303000	1330000	1470000	1620000	1380000	1320000	1420000	344000	332000	378000	253000	281000	317000
Tri924	(-)-Sinigrin hydrate	Others	+	-	-	-	8510	14800	19000	72100	58600	55900	30200	29500	31300	16400	16300	17100	17200	20200	28300
Tri925	N-Propionylglycine	Amino acid derivatives	+	-	-	-	10300000	9500000	9620000	2050000	2030000	2200000	5950000	5500000	6010000	6840000	8510000	7780000	8350000	7980000	4480000
Tri950	α-Hydroxyisobutyric acid	Organic acids	+	+	-	-	110000	91800	105000	425000	560000	597000	547000	502000	508000	152000	144000	165000	105000	98700	96300
Tri951	2-Hydroxybutanoic acid	Organic acids	+	+	-	-	441000	402000	430000	1700000	2220000	2380000	2120000	2100000	2120000	653000	594000	627000	430000	400000	394000
Tri953	2'-Deoxyinosine	Nucleotide and its derivates	-	+	-	-	14000	16200	18000	31300	28100	33800	9	23100	9	31100	29100	29900	17500	16600	13900
Tri956	Citraconic acid	Organic acids	+	-	-	-	15500000	16300000	16400000	986000	607000	677000	13000000	7500000	6280000	17100000	6110000	17700000	8830000	16900000	7970000
Tri971	2,5-dihydroxy benzoic acid O-hexside	Benzoic acid derivatives	-	+	-	-	35700000	20200000	30200000	11400000	13100000	15100000	6560000	6130000	5820000	30200000	25600000	29200000	32600000	30700000	33600000
Tri1006	2-Hydroxy-2-methyl butyric acid	Organic acids	+	+	-	-	5490	9	4980	18500	20500	19500	20300	15500	18100	5060	9	9	9	3500	9
Tri1011	1-O-Caffeoyl quinic acid	Quinate and its derivatives	+	+	-	-	1860000	2900000	1030000	217000	351000	344000	270000	613000	343000	1240000	1400000	1260000	809000	2110000	971000
Tri1019	3-O-p-coumaroyl quinic acid O-hexoside	Quinate and its derivatives	-	+	-	-	18100000	16200000	13800000	5770000	5010000	5240000	1430000	1980000	1850000	8110000	6550000	7380000	13600000	13200000	12700000
Tri1035	Neochlorogenic acid (5-O-Caffeoylquinic acid)	Quinate and its derivatives	+	+	-	-	1630000	2580000	953000	182000	294000	289000	200000	498000	256000	908000	1120000	972000	713000	1680000	714000
Tri1040	5-hydroxyhexanoic acid	Organic acids	-	+	-	-	1110000	947000	954000	3060000	3480000	4840000	9790000	8420000	10300000	2920000	2830000	3010000	1950000	1890000	1990000
Tri1046	Esculin (6,7-Dihydroxycoumarin-6-glucoside)	Coumarins	+	-	-	-	9	9	9	26600	46400	57600	9	9	9	9	9	9	9	9	9
Tri1047	N-Isovaleroylglycine	Amino acid derivatives	+	+	-	-	9	9	4840	22600	27800	38500	15400	19300	14900	9	9	9	9	9	9
Tri1049	2-Isopropylmalate	Organic acids	-	+	-	-	12500000	11500000	11700000	40500000	50100000	64800000	133000000	134000000	129000000	43300000	43600000	47500000	26600000	25500000	25200000
Tri1078	1-O-beta-D-Glucopyranosyl sinapate	Hydroxycinnamoyl derivatives	-	+	-	-	7180000	7410000	6950000	12500000	12700000	13500000	33200000	33600000	34700000	19200000	18600000	18600000	18100000	17200000	16500000
Tri1130	Apigenin O-hexosyl-O-rutinoside	Flavone	-	+	-	-	49500000	74200	90800	186000	216000	137000	109000	103000	9	264000	288000	284000	252000	288000	269000
Tri1150	Acetyl tryptophan	Amino acid derivatives	+	-	-	-	27500000	25200000	26800000	2050000	2450000	3430000	11100000	11800000	11300000	7420000	7080000	7220000	9380000	8530000	8530000
Tri1159	L-Cysteinyl-L-leucylglycyl-L-alanylglycylglycyl-L-alanylglycyl-L-cysteine	Amino acid derivatives	-	+	-	-	9	2180000	2210000	703000	851000	9	5070000	4840000	4680000	669000	643000	673000	631000	593000	622000
Tri1280	Tricin O-malonyl rhamnoside	Flavone	-	+	-	-	1290000	1500000	1500000	876000	932000	1010000	302000	272000	272000	750000	801000	778000	1500000	1360000	1380000
Tri1282	Tricin O-malonyl shikimic acid	Flavone	-	+	-	-	46000	67400	73600	28000	47600	38700	14600	9650	7020	34400	35700	48000	35800	91700	72500
Tri1292	Tricin 4'-O-β-guaiacylglycerol	Flavonolignan	-	+	-	-	43100000	45500000	45900000	37700000	39500000	43200000	9830000	8450000	9650000	46800000	49600000	54800000	85900000	87500000	89500000
Tri1300	Tricin O-oxalic acid O-coumaroyl shikimic acid	Flavone	-	+	-	-	2110000	2180000	2140000	969000	1030000	1060000	217000	152000	196000	1560000	1680000	1830000	9	3300000	3300000
Tri1301	Tricin O-eudesmic acid	Flavone	-	+	-	-	12000000	12700000	13000000	4040000	4320000	4410000	1390000	1270000	1340000	5590000	6030000	7210000	9770000	10200000	10800000
"+" refers to significantly differentially accumulated metabolite comparing with CK treatment.
